# Supplementary material for: Association Between rs12037447, rs146732504, rs151078858, rs55723436, and rs6094136 Polymorphisms and Kawasaki Disease in the Population of Polish Children
Source: Front Pediatr. 2021 Feb 22;9:624798. doi: 10.3389/fped.2021.624798 (PMC7937642; doi:10.3389/fped.2021.624798)
Supplement: Supplementary file 2 [file Table_1.xlsx]

## Sheet: Arkusz1
CHR	SNP	POSITION	A1	F_A	F_U	A2	CHISQ	P	OR	SE	L95	U95	BONF	FDR_BH
1	rs12037447	208605593	G	0.02521	0.002965	A	34.16	5.066 x 10-9	8.697	0.4459	3.629	20.84	0.0008329	0.0008329
6	rs146732504	168434704	A	0.01681	0.001494	C	29.93	4.474 x 10-8	11.42	0.5629	3.79	34.43	0.007354	0.003677
11	rs151078858	48177395	T	0.02101	0.002637	C	26.42	2.745 x 10-7	8.116	0.4854	3.134	21.01	0.04513	0.009211
22	rs55723436	24718408	A	0.03361	0.006177	G	26.39	2.796 x 10-7	5.596	0.3778	2.669	11.74	0.04596	0.009211
20	rs6094136	35854009	G	0.01681	0.001693	A	26.32	2.892 x 10-7	10.08	0.5567	3.385	30.01	0.04755	0.009211
2	rs139662037	227731962	C	0.01261	9.883E-4	T	26.03	3.362 x 10-7	12.9	0.6488	3.618	46.03	0.05527	0.009211
11	rs7124405	70891161	T	0.5294	0.3713	C	24.9	6.027 x 10-7	1.905	0.1312	1.473	2.463	0.09908	0.01345
7	rs2662865	85463717	G	0.07203	0.02245	A	24.74	6.545 x 10-7	3.38	0.2599	2.031	5.625	0.1076	0.01345
9	rs202207863	107289385	T	0.01261	0.001071	C	24.06	9.338 x 10-7	11.91	0.6439	3.372	42.07	0.1535	0.01706
6	rs9267431	31478951	A	0.2227	0.1194	G	23.08	1.552 x 10-6	2.113	0.1591	1.547	2.886	0.2551	0.02207
2	rs12477499	189833034	G	0.02101	0.002965	A	23.02	1.605 x 10-6	7.215	0.4818	2.806	18.55	0.2638	0.02207
4	rs148434007	185012401	T	0.01271	0.001153	C	22.55	2.05 x 10-6	11.15	0.6396	3.183	39.07	0.3371	0.02207
18	rs201067154	43535154	A	0.01681	0.001961	G	22.52	2.082 x 10-6	8.699	0.5495	2.963	25.54	0.3422	0.02207
4	rs1013532	27157313	A	0.08824	0.03246	G	22.41	2.206 x 10-6	2.885	0.2342	1.823	4.565	0.3627	0.02207
12	rs117650853	107360943	A	0.01261	0.001153	G	22.32	2.303 x 10-6	11.06	0.6396	3.157	38.74	0.3785	0.02207
12	rs201236531	60169242	A	0.01261	0.001153	G	22.32	2.308 x 10-6	11.06	0.6396	3.157	38.73	0.3794	0.02207
9	rs117223361	140450082	A	0.01261	0.001155	G	22.28	2.351 x 10-6	11.04	0.6396	3.152	38.68	0.3865	0.02207
10	rs148004684	101639978	T	0.01261	0.001157	C	22.23	2.417 x 10-6	11.02	0.6396	3.146	38.61	0.3973	0.02207
3	rs7624610	128417293	T	0.05556	0.2049	G	22.02	2.693 x 10-6	0.2282	0.3439	0.1163	0.4478	0.4428	0.0233
1	rs144242373	7724562	T	0.02521	0.004365	C	21.38	3.758 x 10-6	5.899	0.4358	2.511	13.86	0.6178	0.03089
4	rs146152443	39450118	G	0.01261	0.001236	A	20.78	5.153 x 10-6	10.32	0.6359	2.967	35.88	0.8472	0.04034
18	rs5022001	10979948	A	0.06303	0.02025	C	20.68	5.436 x 10-6	3.254	0.2745	1.9	5.573	0.8937	0.04062
20	rs7264677	40712091	T	0.05462	0.01656	C	19.91	8.13 x 10-6	3.432	0.294	1.929	6.106	1	0.05687
1	rs11206687	56401121	T	0.4034	0.273	C	19.87	8.302 x 10-6	1.8	0.1337	1.385	2.339	1	0.05687
10	rs143109144	98006765	G	0.02101	0.003378	C	19.59	9.578 x 10-6	6.332	0.4783	2.48	16.17	1	0.05999
3	rs6779229	131690374	G	0.01261	0.001318	T	19.41	1.056 x 10-5	9.675	0.6326	2.8	33.43	1	0.05999
11	rs117367252	27148885	A	0.01261	0.001318	G	19.41	1.056 x 10-5	9.675	0.6326	2.8	33.43	1	0.05999
3	rs143979580	52505935	G	0.01261	0.001318	A	19.4	1.058 x 10-5	9.673	0.6326	2.8	33.42	1	0.05999
15	rs182970297	99670566	G	0.01261	0.001318	A	19.4	1.058 x 10-5	9.673	0.6326	2.8	33.42	1	0.05999
4	rs138933625	57314612	G	0.04274	0.01125	C	19.33	1.101 x 10-5	3.923	0.3354	2.033	7.57	1	0.06035
9	rs2011851	73442413	T	0.3992	0.2711	C	19.24	1.155 x 10-5	1.786	0.134	1.374	2.323	1	0.06125
7	rs7809786	75730804	C	0.03782	0.00942	T	19.05	1.275 x 10-5	4.133	0.3528	2.07	8.253	1	0.06552
19	rs146121969	16884122	A	0.02941	0.006342	G	18.44	1.758 x 10-5	4.748	0.4003	2.167	10.41	1	0.08757
8	rs6985590	28339521	T	0.4202	0.2926	C	18.26	1.924 x 10-5	1.752	0.1329	1.35	2.273	1	0.09029
14	rs12435266	61652860	T	0.2227	0.3564	C	18.25	1.94 x 10-5	0.5174	0.1569	0.3804	0.7038	1	0.09029
14	rs200352133	100728688	G	0.01261	0.001401	A	18.16	2.028 x 10-5	9.102	0.6297	2.649	31.27	1	0.09029
1	rs149911255	220232191	A	0.01261	0.001401	G	18.16	2.032 x 10-5	9.101	0.6297	2.649	31.26	1	0.09029
13	rs9583589	111871770	A	0.1933	0.1068	G	18.04	2.159 x 10-5	2.003	0.1668	1.445	2.778	1	0.09157
2	rs55799208	218999982	A	0.01261	0.001409	G	18.03	2.172 x 10-5	9.05	0.6297	2.634	31.09	1	0.09157
5	rs139195027	140811030	T	0.01261	0.001424	C	17.62	2.691 x 10-5	8.952	0.6326	2.591	30.93	1	0.1087
4	rs61361928	69962375	C	0.02542	0.005082	T	17.59	2.742 x 10-5	5.107	0.433	2.186	11.93	1	0.1087
17	rs3744075	37074932	T	0.07203	0.0268	C	17.55	2.795 x 10-5	2.819	0.2584	1.699	4.678	1	0.1087
5	rs9314038	163929870	G	0.2731	0.4076	A	17.52	2.85 x 10-5	0.5461	0.1466	0.4097	0.728	1	0.1087
16	rs141532757	66436722	A	0.01681	0.00246	G	17.48	2.909 x 10-5	6.933	0.5386	2.412	19.92	1	0.1087
10	rs3001861	52429450	T	0.2328	0.1368	C	17.4	3.025 x 10-5	1.914	0.1583	1.404	2.611	1	0.1091
17	rs115111915	27401010	A	0.03361	0.008236	G	17.38	3.054 x 10-5	4.189	0.3734	2.015	8.708	1	0.1091
14	rs137867108	23467700	A	0.02101	0.003748	T	17.1	3.547 x 10-5	5.705	0.476	2.244	14.5	1	0.1195
10	rs10883953	105724329	T	0.5672	0.433	C	17.1	3.555 x 10-5	1.716	0.1321	1.325	2.223	1	0.1195
11	rs9704794	35394729	A	0.3193	0.2088	G	17.07	3.603 x 10-5	1.778	0.1411	1.348	2.344	1	0.1195
1	rs200737782	155178993	C	0.01261	0.001482	G	17.05	3.635 x 10-5	8.599	0.6271	2.516	29.39	1	0.1195
1	rs144416050	31897639	T	0.01681	0.002554	C	16.82	4.114 x 10-5	6.677	0.5354	2.338	19.07	1	0.131
3	rs11928535	137818099	A	0.2815	0.1784	G	16.78	4.208 x 10-5	1.805	0.1461	1.355	2.403	1	0.131
11	rs4506683	70906073	A	0.2731	0.1716	G	16.75	4.253 x 10-5	1.813	0.1475	1.358	2.421	1	0.131
1	rs2700335	96158128	T	0.2017	0.327	C	16.73	4.303 x 10-5	0.5198	0.1627	0.3779	0.7151	1	0.131
8	rs7011172	144312990	G	0.1471	0.2646	A	16.58	4.675 x 10-5	0.4793	0.1846	0.3338	0.6882	1	0.1362
5	rs4916731	87135072	G	0.01261	0.001517	T	16.56	4.716 x 10-5	8.401	0.6271	2.458	28.72	1	0.1362
7	rs147895540	62736908	A	0.1218	0.05867	G	16.53	4.793 x 10-5	2.226	0.202	1.498	3.307	1	0.1362
15	rs11635054	51237910	C	0.1218	0.0586	T	16.51	4.832 x 10-5	2.229	0.2024	1.499	3.314	1	0.1362
3	rs9790068	105911052	G	0.4286	0.3058	A	16.49	4.895 x 10-5	1.702	0.1325	1.313	2.207	1	0.1362
15	rs149154554	22869996	G	0.05882	0.02052	A	16.46	4.97 x 10-5	2.983	0.2828	1.714	5.193	1	0.1362
8	rs7003452	35021424	A	0.5546	0.4238	G	16.34	5.287 x 10-5	1.693	0.1317	1.308	2.192	1	0.1396
1	rs11206690	56407227	G	0.2479	0.1524	A	16.32	5.337 x 10-5	1.833	0.1522	1.36	2.471	1	0.1396
3	rs17290219	150881774	C	0.1795	0.09909	A	16.32	5.351 x 10-5	1.989	0.1734	1.416	2.794	1	0.1396
1	rs695051	86501618	G	0.2672	0.3977	A	16.19	5.738 x 10-5	0.5523	0.1496	0.4119	0.7405	1	0.1474
3	rs1838554	105927328	A	0.3445	0.233	G	16.15	5.855 x 10-5	1.73	0.1381	1.32	2.268	1	0.1481
18	rs140750904	28972253	A	0.01261	0.001565	G	16.04	6.206 x 10-5	8.145	0.6247	2.394	27.71	1	0.1525
19	rs147606182	16045531	T	0.01261	0.001565	C	16.04	6.217 x 10-5	8.144	0.6247	2.394	27.71	1	0.1525
2	rs6732511	75839733	T	0.2227	0.1332	C	16.0	6.343 x 10-5	1.864	0.1581	1.367	2.541	1	0.1533
11	rs11232123	80130893	T	0.1849	0.1044	C	15.97	6.444 x 10-5	1.946	0.1696	1.396	2.714	1	0.1535
6	rs4945521	114970753	T	0.3193	0.4488	C	15.84	6.881 x 10-5	0.5761	0.1402	0.4376	0.7583	1	0.1616
17	rs201236281	79427961	A	0.0	0.06215	G	15.74	7.249 x 10-5	0.0	inf	0.0	nan	1	0.1668
6	rs4946872	108147644	A	0.2731	0.1742	G	15.73	7.304 x 10-5	1.781	0.1474	1.334	2.378	1	0.1668
1	rs11206686	56394673	G	0.3405	0.23	A	15.6	7.829 x 10-5	1.729	0.1402	1.313	2.275	1	0.1735
8	rs13438797	70582510	C	0.3739	0.2603	T	15.59	7.882 x 10-5	1.698	0.1356	1.302	2.214	1	0.1735
6	rs17065282	105180893	A	0.04128	0.1322	G	15.55	8.018 x 10-5	0.2827	0.3418	0.1447	0.5524	1	0.1735
3	rs12488982	105916460	G	0.3992	0.2826	A	15.55	8.02 x 10-5	1.686	0.1339	1.297	2.192	1	0.1735
6	rs2876142	131622339	T	0.1429	0.07448	C	15.49	8.285 x 10-5	2.071	0.189	1.43	3.0	1	0.1769
10	rs10828820	25840422	T	0.1429	0.07478	C	15.39	8.757 x 10-5	2.062	0.1884	1.425	2.983	1	0.1846
5	rs10941049	33227083	T	0.08696	0.1886	C	15.31	9.103 x 10-5	0.4096	0.2355	0.2582	0.6499	1	0.1894
8	rs10099120	85101510	T	0.05882	0.1498	C	15.26	9.383 x 10-5	0.3548	0.2771	0.2061	0.6107	1	0.1928
8	rs140302382	22168668	A	0.01261	0.001648	T	15.1	1.017 x 10-4	7.734	0.6226	2.282	26.2	1	0.1967
8	rs7820870	15039864	A	0.1639	0.2774	G	15.09	1.026 x 10-4	0.5105	0.1763	0.3613	0.7211	1	0.1967
10	rs999639	45124638	T	0.3319	0.2254	C	15.08	1.028 x 10-4	1.708	0.1394	1.3	2.244	1	0.1967
12	rs144046411	121002949	C	0.01261	0.001651	G	15.07	1.036 x 10-4	7.72	0.6226	2.278	26.16	1	0.1967
2	rs202201931	72722565	C	0.02101	0.004119	T	15.05	1.045 x 10-4	5.189	0.4737	2.051	13.13	1	0.1967
11	rs10488773	82539504	T	0.3445	0.2364	G	15.04	1.053 x 10-4	1.698	0.1381	1.296	2.226	1	0.1967
5	rs141456207	131647490	A	0.02941	0.00726	C	15.02	1.065 x 10-4	4.144	0.3983	1.898	9.046	1	0.1967
13	rs1063181	50510401	G	0.1356	0.06982	C	15.01	1.069 x 10-4	2.09	0.1944	1.428	3.059	1	0.1967
3	rs12495467	54631902	A	0.4244	0.3072	C	15.0	1.077 x 10-4	1.663	0.1326	1.282	2.156	1	0.1967
12	rs200404819	80729888	A	0.01681	0.0028	G	14.97	1.095 x 10-4	6.087	0.5327	2.143	17.29	1	0.1967
5	rs10036320	87110058	T	0.01261	0.00166	C	14.96	1.098 x 10-4	7.676	0.6226	2.265	26.01	1	0.1967
7	rs7806567	64465502	A	0.5975	0.4697	G	14.95	1.103 x 10-4	1.676	0.1349	1.287	2.183	1	0.1967
3	rs6443357	176289744	C	0.3613	0.2513	A	14.94	1.113 x 10-4	1.686	0.1365	1.29	2.203	1	0.1967
13	rs1764414	96051321	C	0.5763	0.45	T	14.89	1.141 x 10-4	1.662	0.133	1.281	2.157	1	0.1996
19	rs112293642	40554705	C	0.02101	0.004173	T	14.76	1.22 x 10-4	5.121	0.4737	2.024	12.96	1	0.211
1	rs3753163	9318401	C	0.4701	0.3489	T	14.69	1.267 x 10-4	1.656	0.1328	1.276	2.148	1	0.2142
1	rs61749262	183101582	G	0.05042	0.01721	A	14.68	1.273 x 10-4	3.032	0.3043	1.67	5.505	1	0.2142
2	rs144390858	196866433	C	0.04202	0.01301	A	14.67	1.281 x 10-4	3.327	0.3329	1.733	6.388	1	0.2142
7	rs201568035	30721871	T	0.0	0.05809	A	14.65	1.291 x 10-4	0.0	inf	0.0	nan	1	0.2142
5	rs78741041	140070876	T	0.02101	0.004202	G	14.64	1.303 x 10-4	5.086	0.4733	2.011	12.86	1	0.2142
3	rs9880494	113903791	A	0.2051	0.3228	G	14.57	1.349 x 10-4	0.5415	0.1631	0.3933	0.7455	1	0.2196
7	rs2888807	90216277	G	0.3613	0.4857	T	14.47	1.427 x 10-4	0.599	0.1361	0.4587	0.7822	1	0.23
3	rs34759087	49162284	T	0.2521	0.1604	C	14.43	1.452 x 10-4	1.764	0.1513	1.311	2.373	1	0.2317
6	rs12208969	80313297	C	0.479	0.3597	T	14.38	1.496 x 10-4	1.636	0.1311	1.266	2.116	1	0.2324
6	rs4594925	169220177	C	0.1807	0.2934	T	14.36	1.508 x 10-4	0.5312	0.1697	0.3809	0.7407	1	0.2324
1	rs2022623	83553657	A	0.2227	0.137	G	14.33	1.532 x 10-4	1.804	0.158	1.323	2.459	1	0.2324
11	rs10834232	23926630	C	0.3025	0.4248	T	14.3	1.558 x 10-4	0.5873	0.1423	0.4444	0.7763	1	0.2324
1	rs2265927	93521050	G	0.3571	0.2498	T	14.29	1.569 x 10-4	1.669	0.1369	1.276	2.183	1	0.2324
13	rs7993595	92921577	C	0.2797	0.1831	T	14.27	1.585 x 10-4	1.732	0.1472	1.298	2.312	1	0.2324
17	rs202011755	4607235	A	0.01261	0.00173	G	14.27	1.587 x 10-4	7.367	0.6207	2.182	24.87	1	0.2324
15	rs143652834	40068725	C	0.01261	0.001731	T	14.26	1.595 x 10-4	7.364	0.6207	2.181	24.86	1	0.2324
3	rs144687901	121413951	G	0.01261	0.001731	A	14.25	1.6 x 10-4	7.361	0.6207	2.181	24.85	1	0.2324
19	rs114495857	54675729	C	0.01261	0.001732	T	14.25	1.603 x 10-4	7.36	0.6207	2.18	24.84	1	0.2324
1	rs10909882	3049713	A	0.02941	0.007504	G	14.24	1.611 x 10-4	4.008	0.398	1.837	8.744	1	0.2324
16	rs72485966	34583896	G	0.0678	0.02704	A	14.21	1.638 x 10-4	2.617	0.265	1.557	4.399	1	0.233
21	rs2219515	24684174	A	0.05882	0.1453	G	14.19	1.65 x 10-4	0.3676	0.2767	0.2137	0.6323	1	0.233
10	rs10763593	60732753	G	0.4496	0.3332	A	14.18	1.658 x 10-4	1.635	0.1318	1.263	2.117	1	0.233
1	rs76502631	161088000	A	0.02521	0.005847	G	14.16	1.68 x 10-4	4.397	0.4303	1.892	10.22	1	0.2341
22	rs133616	48691715	G	0.3739	0.2653	A	14.07	1.76 x 10-4	1.654	0.1355	1.268	2.158	1	0.2431
8	rs17747567	50758648	A	0.04787	0.1438	C	13.93	1.896 x 10-4	0.2995	0.3427	0.153	0.5863	1	0.2598
20	rs12481708	30686423	T	0.01681	0.002965	C	13.88	1.945 x 10-4	5.747	0.5312	2.029	16.28	1	0.2617
6	rs11964644	54695124	T	0.1933	0.115	C	13.87	1.956 x 10-4	1.843	0.1666	1.329	2.555	1	0.2617
10	rs1557106	6362220	G	0.05042	0.01772	A	13.86	1.971 x 10-4	2.944	0.3041	1.622	5.343	1	0.2617
6	rs4708499	169228159	C	0.2983	0.2005	T	13.85	1.98 x 10-4	1.696	0.1435	1.28	2.246	1	0.2617
2	rs6758293	76580070	G	0.4244	0.3114	T	13.84	1.99 x 10-4	1.63	0.1326	1.257	2.114	1	0.2617
18	rs7242547	56167346	G	0.07944	0.1765	A	13.74	2.101 x 10-4	0.4026	0.2539	0.2447	0.6621	1	0.2741
7	rs11983484	95687885	T	0.09813	0.1999	C	13.71	2.139 x 10-4	0.4355	0.2309	0.277	0.6848	1	0.2768
7	rs10239251	104088583	C	0.2941	0.1975	T	13.64	2.218 x 10-4	1.693	0.1441	1.276	2.245	1	0.2835
1	rs7511717	241428657	A	0.2941	0.1976	G	13.63	2.225 x 10-4	1.692	0.1441	1.276	2.245	1	0.2835
3	rs6445063	172193632	C	0.2227	0.1389	T	13.58	2.289 x 10-4	1.776	0.158	1.303	2.421	1	0.2894
8	rs4871131	121796183	C	0.1891	0.1122	T	13.54	2.341 x 10-4	1.845	0.169	1.325	2.57	1	0.2938
12	rs144673785	109684039	A	0.02101	0.004447	G	13.5	2.388 x 10-4	4.804	0.4721	1.904	12.12	1	0.2941
1	rs11102314	112153539	T	0.06771	0.167	C	13.49	2.393 x 10-4	0.3623	0.2883	0.2059	0.6374	1	0.2941
1	rs192869620	156551248	A	0.02101	0.004449	G	13.49	2.397 x 10-4	4.802	0.4721	1.904	12.11	1	0.2941
17	rs9904357	12105953	C	0.01261	0.001816	A	13.45	2.448 x 10-4	7.017	0.619	2.086	23.6	1	0.2982
6	rs9362615	89806689	C	0.4534	0.3388	T	13.43	2.476 x 10-4	1.618	0.1326	1.248	2.099	1	0.2993
6	rs139282334	111912641	T	0.01282	0.001825	G	13.41	2.497 x 10-4	7.103	0.6248	2.087	24.17	1	0.2997
2	rs75002266	148696810	A	0.01681	0.003048	G	13.38	2.541 x 10-4	5.591	0.5305	1.977	15.81	1	0.3005
15	rs146077918	91308570	T	0.01681	0.003048	C	13.38	2.541 x 10-4	5.591	0.5305	1.977	15.81	1	0.3005
12	rs11062600	3383781	A	0.02521	0.006095	G	13.29	2.675 x 10-4	4.218	0.4296	1.817	9.789	1	0.3121
8	rs11774767	75774987	C	0.4496	0.3367	T	13.28	2.677 x 10-4	1.609	0.1317	1.243	2.083	1	0.3121
1	rs7516605	56343290	C	0.2185	0.1363	A	13.25	2.723 x 10-4	1.771	0.1591	1.297	2.42	1	0.3153
7	rs3898649	75546892	A	0.3824	0.2757	G	13.24	2.747 x 10-4	1.626	0.1349	1.248	2.119	1	0.3158
9	rs3780528	113667277	C	0.2521	0.1638	T	13.19	2.808 x 10-4	1.721	0.1513	1.28	2.315	1	0.3206
4	rs10001214	63229994	C	0.4622	0.3488	T	13.16	2.856 x 10-4	1.604	0.1314	1.24	2.075	1	0.3239
11	rs10792369	62786435	C	0.1807	0.2877	T	13.1	2.954 x 10-4	0.546	0.1697	0.3915	0.7614	1	0.3326
8	rs2003880	6788102	A	0.05882	0.1407	G	13.07	3.008 x 10-4	0.3817	0.2767	0.2219	0.6566	1	0.3363
6	rs146819030	105609515	T	0.03782	0.01178	C	13.05	3.033 x 10-4	3.298	0.3501	1.66	6.549	1	0.3369
1	rs1556594268	144479557	T	0.3248	0.2249	G	12.97	3.17 x 10-4	1.658	0.1417	1.256	2.188	1	0.3497
11	rs11020388	93240847	T	0.2924	0.1978	G	12.95	3.196 x 10-4	1.675	0.1449	1.261	2.226	1	0.3503
11	rs10898033	82523453	A	0.3613	0.2581	G	12.93	3.242 x 10-4	1.626	0.1365	1.244	2.125	1	0.3515
7	rs138139143	42949773	T	0.01681	0.00313	C	12.91	3.26 x 10-4	5.445	0.5298	1.928	15.38	1	0.3515
16	rs201908706	68265946	T	0.01681	0.003131	C	12.91	3.271 x 10-4	5.443	0.5298	1.927	15.37	1	0.3515
4	rs4861931	182204531	A	0.2857	0.1927	G	12.88	3.313 x 10-4	1.676	0.1453	1.26	2.228	1	0.3537
14	rs2746996	86066054	C	0.2143	0.1339	T	12.87	3.346 x 10-4	1.764	0.1602	1.288	2.414	1	0.3549
5	rs1388581	21198362	G	0.4622	0.3502	A	12.82	3.432 x 10-4	1.594	0.1314	1.232	2.063	1	0.3576
17	rs181353842	76482076	A	0.01261	0.001894	G	12.78	3.508 x 10-4	6.727	0.6174	2.006	22.56	1	0.3576
8	rs145832961	124162363	T	0.01261	0.001895	C	12.77	3.513 x 10-4	6.725	0.6174	2.005	22.55	1	0.3576
12	rs28362800	14993666	A	0.01261	0.001895	G	12.77	3.513 x 10-4	6.725	0.6174	2.005	22.55	1	0.3576
19	rs7245851	20955898	G	0.2437	0.158	A	12.77	3.516 x 10-4	1.717	0.153	1.272	2.318	1	0.3576
3	rs140420375	32776360	C	0.01261	0.001895	T	12.77	3.519 x 10-4	6.724	0.6174	2.005	22.55	1	0.3576
1	rs200273930	93677792	A	0.01261	0.001895	C	12.77	3.524 x 10-4	6.723	0.6174	2.005	22.55	1	0.3576
3	rs9830017	72442023	G	0.01261	0.001898	A	12.74	3.578 x 10-4	6.712	0.6174	2.001	22.51	1	0.3591
5	rs13164902	163882988	T	0.605	0.4883	C	12.73	3.601 x 10-4	1.605	0.1338	1.235	2.087	1	0.3591
11	rs62617129	121444958	G	0.02521	0.006273	A	12.7	3.665 x 10-4	4.097	0.4292	1.767	9.502	1	0.3591
4	rs1873515	38509827	C	0.07563	0.03336	T	12.64	3.773 x 10-4	2.371	0.2503	1.452	3.873	1	0.3591
2	rs145486099	112813190	C	0.008475	0.0662	G	12.62	3.819 x 10-4	0.1206	0.7122	0.02986	0.4869	1	0.3591
21	rs2822660	15786271	C	0.2563	0.1689	A	12.59	3.87 x 10-4	1.696	0.1504	1.263	2.277	1	0.3591
12	rs10840859	17947648	C	0.3067	0.2116	T	12.58	3.905 x 10-4	1.648	0.1423	1.247	2.179	1	0.3591
1	rs4838896	111821777	C	0.572	0.4561	T	12.54	3.979 x 10-4	1.594	0.1328	1.229	2.068	1	0.3591
16	rs6497599	10069793	A	0.3613	0.477	G	12.53	4.015 x 10-4	0.6203	0.1362	0.475	0.81	1	0.3591
12	rs141457914	20522796	C	0.0	0.05008	T	12.52	4.019 x 10-4	0.0	inf	0.0	nan	1	0.3591
1	rs199547562	32680494	T	0.008403	9.059E-4	C	12.51	4.051 x 10-4	9.346	0.7715	2.06	42.4	1	0.3591
2	rs72677232	179482937	T	0.008403	9.059E-4	C	12.51	4.051 x 10-4	9.346	0.7715	2.06	42.4	1	0.3591
6	rs145455750	41162371	C	0.008403	9.059E-4	T	12.51	4.051 x 10-4	9.346	0.7715	2.06	42.4	1	0.3591
7	rs202246313	111629218	A	0.008403	9.059E-4	G	12.51	4.051 x 10-4	9.346	0.7715	2.06	42.4	1	0.3591
12	rs7313078	128883721	A	0.008403	9.059E-4	G	12.51	4.051 x 10-4	9.346	0.7715	2.06	42.4	1	0.3591
17	rs9896466	58553365	A	0.008403	9.059E-4	G	12.51	4.051 x 10-4	9.346	0.7715	2.06	42.4	1	0.3591
20	rs146651027	61987436	G	0.008403	9.061E-4	C	12.51	4.057 x 10-4	9.344	0.7715	2.06	42.39	1	0.3591
6	rs144994895	131897807	A	0.008403	9.064E-4	G	12.5	4.068 x 10-4	9.341	0.7715	2.059	42.38	1	0.3591
7	rs146553177	99811388	T	0.008403	9.064E-4	C	12.5	4.068 x 10-4	9.341	0.7715	2.059	42.38	1	0.3591
19	rs192263602	35505292	A	0.008403	9.064E-4	G	12.5	4.068 x 10-4	9.341	0.7715	2.059	42.38	1	0.3591
1	rs200824960	153751927	A	0.008403	9.071E-4	G	12.49	4.096 x 10-4	9.334	0.7715	2.057	42.34	1	0.3591
1	rs140974114	7887262	A	0.02521	0.006342	G	12.48	4.115 x 10-4	4.052	0.429	1.748	9.394	1	0.3591
13	rs547734	75847299	C	0.008403	9.083E-4	T	12.47	4.141 x 10-4	9.321	0.7715	2.055	42.28	1	0.3591
7	rs322760	127773388	T	0.4958	0.3833	C	12.47	4.145 x 10-4	1.582	0.131	1.224	2.045	1	0.3591
19	rs151036435	549781	A	0.008403	9.085E-4	G	12.46	4.147 x 10-4	9.32	0.7715	2.054	42.28	1	0.3591
20	rs2233090	43933437	T	0.008403	9.086E-4	C	12.46	4.152 x 10-4	9.318	0.7715	2.054	42.27	1	0.3591
10	rs7085505	125523462	T	0.08824	0.04163	C	12.46	4.168 x 10-4	2.228	0.233	1.411	3.518	1	0.3591
20	rs1321581	9171861	A	0.3277	0.4423	G	12.44	4.192 x 10-4	0.6146	0.1393	0.4677	0.8075	1	0.3591
9	rs10817638	117322542	G	0.479	0.3675	A	12.44	4.198 x 10-4	1.582	0.1311	1.223	2.046	1	0.3591
3	rs140892840	164906031	C	0.008403	9.107E-4	T	12.43	4.233 x 10-4	9.297	0.7715	2.049	42.17	1	0.3591
3	rs1259313	120214132	T	0.07143	0.03096	C	12.43	4.235 x 10-4	2.408	0.2572	1.454	3.986	1	0.3591
7	rs17143902	21166006	A	0.008403	9.109E-4	C	12.42	4.238 x 10-4	9.295	0.7715	2.049	42.17	1	0.3591
15	rs145647822	40564840	A	0.008403	9.115E-4	G	12.41	4.262 x 10-4	9.289	0.7715	2.048	42.14	1	0.3591
9	rs143416740	139306606	T	0.0	0.05018	C	12.41	4.281 x 10-4	0.0	inf	0.0	nan	1	0.3591
11	rs614367	69328764	T	0.2731	0.1836	C	12.39	4.323 x 10-4	1.671	0.1474	1.252	2.23	1	0.3608
7	rs17161469	32645512	C	0.2311	0.1488	A	12.36	4.391 x 10-4	1.719	0.1559	1.266	2.333	1	0.3646
6	rs9397900	150665752	A	0.2059	0.1286	G	12.33	4.446 x 10-4	1.757	0.1626	1.278	2.417	1	0.3673
12	rs151284263	49363980	A	0.008403	9.194E-4	G	12.28	4.576 x 10-4	9.209	0.7715	2.03	41.77	1	0.3761
6	rs4712624	21693152	G	0.04494	0.1349	A	12.26	4.62 x 10-4	0.3018	0.3628	0.1482	0.6144	1	0.3763
5	rs16892218	34042757	T	0.2143	0.1355	C	12.26	4.624 x 10-4	1.74	0.1602	1.271	2.382	1	0.3763
13	rs1538335	96058833	A	0.542	0.4286	G	12.25	4.662 x 10-4	1.578	0.1314	1.22	2.041	1	0.3773
17	rs16939893	43240081	T	0.02941	0.008236	C	12.22	4.738 x 10-4	3.649	0.3966	1.677	7.939	1	0.3773
6	rs1866896	158941011	A	0.5504	0.4369	G	12.21	4.758 x 10-4	1.578	0.1316	1.219	2.042	1	0.3773
8	rs11784810	24427039	G	0.4748	0.3645	T	12.21	4.761 x 10-4	1.576	0.1312	1.218	2.038	1	0.3773
19	rs142418616	8138038	T	0.008403	9.241E-4	C	12.2	4.768 x 10-4	9.163	0.7715	2.02	41.57	1	0.3773
11	rs61733406	102826383	A	0.02941	0.008241	G	12.2	4.774 x 10-4	3.647	0.3966	1.676	7.933	1	0.3773
13	rs7999590	40907624	A	0.3067	0.4194	G	12.18	4.825 x 10-4	0.6125	0.1418	0.4639	0.8087	1	0.3774
6	rs9477268	16956041	T	0.2521	0.1666	C	12.18	4.83 x 10-4	1.686	0.1513	1.253	2.267	1	0.3774
15	rs143466490	63889602	A	0.04202	0.01436	T	12.17	4.865 x 10-4	3.011	0.3321	1.57	5.773	1	0.3774
3	rs6437616	105505307	A	0.1975	0.1223	G	12.17	4.867 x 10-4	1.766	0.1652	1.278	2.441	1	0.3774
10	rs17222561	101565157	G	0.02101	0.004777	A	12.15	4.917 x 10-4	4.471	0.4708	1.777	11.25	1	0.3795
9	rs199684342	79318320	A	0.01261	0.001977	G	12.12	4.997 x 10-4	6.446	0.6159	1.928	21.55	1	0.3803
10	rs72787346	26377331	T	0.01261	0.001977	C	12.12	4.997 x 10-4	6.446	0.6159	1.928	21.55	1	0.3803
17	rs149631185	45904542	T	0.01261	0.001977	C	12.12	4.997 x 10-4	6.446	0.6159	1.928	21.55	1	0.3803
8	rs17303296	76338381	C	0.2269	0.1461	T	12.1	5.03 x 10-4	1.715	0.1569	1.261	2.333	1	0.381
19	rs151200468	34791496	A	0.01261	0.00198	G	12.09	5.063 x 10-4	6.436	0.6159	1.925	21.52	1	0.3818
6	rs2679684	122305408	G	0.3193	0.2243	A	12.06	5.162 x 10-4	1.623	0.1407	1.232	2.138	1	0.3875
7	rs7807392	75510561	A	0.2941	0.2026	G	12.01	5.283 x 10-4	1.64	0.144	1.236	2.174	1	0.3948
5	rs1441534	3265689	T	0.2143	0.3197	C	11.97	5.406 x 10-4	0.5803	0.1592	0.4248	0.7927	1	0.4021
3	rs116482870	50339622	T	0.1429	0.08081	C	11.94	5.497 x 10-4	1.896	0.1882	1.311	2.742	1	0.4063
3	rs726443	105438320	T	0.4664	0.3579	C	11.93	5.512 x 10-4	1.568	0.1313	1.212	2.029	1	0.4063
5	rs31689	159288452	C	0.4244	0.3189	T	11.92	5.56 x 10-4	1.575	0.1326	1.214	2.042	1	0.408
6	rs115069429	160872648	C	0.0	0.04774	T	11.9	5.62 x 10-4	0.0	inf	0.0	nan	1	0.4092
19	rs368350857	58441926	A	0.0	0.0478	C	11.88	5.677 x 10-4	0.0	inf	0.0	nan	1	0.4092
2	rs975719	210232466	C	0.542	0.4303	T	11.86	5.725 x 10-4	1.567	0.1314	1.211	2.027	1	0.4092
2	rs2889606	106554990	G	0.437	0.3308	A	11.86	5.73 x 10-4	1.57	0.1321	1.212	2.035	1	0.4092
8	rs11776933	142460269	A	0.1429	0.2388	C	11.86	5.731 x 10-4	0.5312	0.1867	0.3685	0.7659	1	0.4092
13	rs536850	33677971	C	0.3403	0.2434	A	11.84	5.812 x 10-4	1.603	0.1384	1.222	2.103	1	0.4092
17	rs62077764	78346870	A	0.1068	0.05477	C	11.82	5.849 x 10-4	2.065	0.2154	1.354	3.149	1	0.4092
6	rs884678	150658401	G	0.2101	0.1333	A	11.82	5.865 x 10-4	1.73	0.1613	1.261	2.373	1	0.4092
5	rs13181946	116143444	G	0.542	0.4306	A	11.8	5.91 x 10-4	1.565	0.1314	1.21	2.025	1	0.4092
4	rs7694238	63096403	G	0.4454	0.3388	T	11.8	5.917 x 10-4	1.567	0.1318	1.21	2.029	1	0.4092
7	rs6963356	42209050	T	0.02521	0.006553	C	11.8	5.925 x 10-4	3.921	0.4292	1.691	9.093	1	0.4092
1	rs9308491	232310039	G	0.3782	0.2773	A	11.8	5.937 x 10-4	1.585	0.1352	1.216	2.066	1	0.4092
17	rs1984722	66988666	G	0.105	0.05388	A	11.78	5.978 x 10-4	2.061	0.2152	1.352	3.142	1	0.4092
4	rs9993524	63097936	G	0.4454	0.3389	A	11.78	5.999 x 10-4	1.566	0.1318	1.21	2.028	1	0.4092
11	rs150370599	60718792	T	0.105	0.05387	C	11.77	6.009 x 10-4	2.061	0.2153	1.352	3.143	1	0.4092
14	rs4444235	54410919	C	0.3529	0.4649	T	11.77	6.02 x 10-4	0.6278	0.1369	0.4801	0.821	1	0.4092
3	rs1877935	189010993	C	0.416	0.3118	T	11.76	6.052 x 10-4	1.572	0.133	1.211	2.04	1	0.4092
19	rs12459076	20925934	C	0.3067	0.2143	A	11.76	6.064 x 10-4	1.622	0.1423	1.227	2.144	1	0.4092
11	rs10831644	11599177	C	0.3782	0.4903	T	11.75	6.083 x 10-4	0.6321	0.1349	0.4852	0.8234	1	0.4092
19	rs55876273	39018347	C	0.02101	0.004882	G	11.75	6.085 x 10-4	4.374	0.4705	1.74	11.0	1	0.4092
8	rs9694342	141587404	T	0.1723	0.2718	C	11.73	6.143 x 10-4	0.5576	0.1729	0.3973	0.7825	1	0.4092
13	rs961106	33732440	C	0.3403	0.4519	T	11.73	6.148 x 10-4	0.6259	0.138	0.4775	0.8203	1	0.4092
7	rs1011967	25290055	A	0.2017	0.1268	G	11.72	6.187 x 10-4	1.74	0.1638	1.262	2.399	1	0.4092
18	rs7229281	75479149	A	0.2101	0.3138	G	11.7	6.254 x 10-4	0.5816	0.1603	0.4248	0.7963	1	0.4092
10	rs138534983	50724013	G	0.0	0.0469	A	11.69	6.28 x 10-4	0.0	inf	0.0	nan	1	0.4092
15	rs7182982	68547440	T	0.0	0.04687	C	11.69	6.296 x 10-4	0.0	inf	0.0	nan	1	0.4092
1	rs2066136	222230715	T	0.416	0.3122	G	11.67	6.364 x 10-4	1.569	0.133	1.209	2.036	1	0.4092
2	rs4988826	22756232	G	0.5462	0.4353	A	11.66	6.378 x 10-4	1.561	0.1315	1.207	2.02	1	0.4092
7	rs4719120	70851287	T	0.2731	0.3816	C	11.66	6.387 x 10-4	0.609	0.1467	0.4568	0.8118	1	0.4092
6	rs9358118	16989325	A	0.2563	0.1717	G	11.65	6.405 x 10-4	1.662	0.1504	1.238	2.232	1	0.4092
12	rs215231	594525	A	0.2521	0.3593	G	11.65	6.411 x 10-4	0.6012	0.1506	0.4475	0.8076	1	0.4092
13	rs1889540	84480740	G	0.01681	0.003344	T	11.65	6.411 x 10-4	5.095	0.5312	1.799	14.43	1	0.4092
2	rs17505257	50366097	A	0.4328	0.3278	G	11.65	6.432 x 10-4	1.565	0.1322	1.208	2.028	1	0.4092
12	rs7961041	104453196	C	0.2353	0.1543	T	11.64	6.439 x 10-4	1.687	0.1549	1.245	2.285	1	0.4092
19	rs2287887	7827955	C	0.1681	0.2666	A	11.64	6.446 x 10-4	0.5558	0.1746	0.3947	0.7825	1	0.4092
3	rs9859953	105455366	T	0.3613	0.2629	C	11.62	6.539 x 10-4	1.586	0.1365	1.214	2.073	1	0.4125
7	rs2614950	3581391	G	0.3602	0.2615	A	11.61	6.565 x 10-4	1.589	0.1372	1.215	2.08	1	0.4125
6	rs1537624	6474600	A	0.5298	0.4001	G	11.59	6.623 x 10-4	1.689	0.1557	1.245	2.292	1	0.4125
1	rs4912314	56968477	T	0.2941	0.204	C	11.59	6.63 x 10-4	1.625	0.144	1.226	2.156	1	0.4125
1	rs16833075	236157277	G	0.08475	0.168	T	11.56	6.747 x 10-4	0.4587	0.235	0.2894	0.727	1	0.4125
6	rs4946861	108088477	C	0.2815	0.1934	T	11.55	6.785 x 10-4	1.634	0.1459	1.228	2.176	1	0.4125
3	rs61751189	37670679	A	0.02101	0.004942	G	11.54	6.821 x 10-4	4.321	0.4702	1.72	10.86	1	0.4125
8	rs990463	24345959	G	0.4286	0.3244	A	11.53	6.852 x 10-4	1.562	0.1324	1.205	2.025	1	0.4125
2	rs4674354	219903723	C	0.1218	0.2125	T	11.53	6.853 x 10-4	0.5143	0.1994	0.3479	0.7602	1	0.4125
11	rs112188995	102593266	T	0.01261	0.002059	C	11.5	6.942 x 10-4	6.187	0.6145	1.855	20.64	1	0.4125
16	rs74417767	89927183	A	0.01261	0.002059	G	11.5	6.942 x 10-4	6.187	0.6145	1.855	20.64	1	0.4125
18	rs149622251	331717	T	0.01261	0.002059	C	11.5	6.942 x 10-4	6.187	0.6145	1.855	20.64	1	0.4125
7	rs3800789	150713827	A	0.06356	0.02698	G	11.5	6.949 x 10-4	2.448	0.2727	1.434	4.177	1	0.4125
4	rs9994927	63214913	A	0.458	0.3518	G	11.5	6.955 x 10-4	1.557	0.1315	1.203	2.014	1	0.4125
2	rs974260	83041653	T	0.5042	0.3957	C	11.47	7.081 x 10-4	1.553	0.131	1.201	2.007	1	0.4125
10	rs899888	45181550	C	0.1653	0.09853	A	11.46	7.1 x 10-4	1.811	0.178	1.278	2.567	1	0.4125
17	rs2382644	72346868	T	0.1681	0.101	C	11.45	7.137 x 10-4	1.799	0.176	1.274	2.54	1	0.4125
17	rs12452592	70188525	G	0.542	0.4323	A	11.43	7.231 x 10-4	1.554	0.1314	1.201	2.01	1	0.4125
20	rs2031979	51475632	T	0.06723	0.0294	C	11.43	7.232 x 10-4	2.379	0.2644	1.417	3.994	1	0.4125
19	rs16964557	31202253	C	0.07563	0.1555	T	11.42	7.255 x 10-4	0.4445	0.2464	0.2742	0.7205	1	0.4125
7	rs1029563	84738495	G	0.3361	0.2413	T	11.41	7.323 x 10-4	1.592	0.1388	1.213	2.09	1	0.4125
3	rs7649120	109582957	C	0.4118	0.3094	T	11.4	7.336 x 10-4	1.562	0.1332	1.203	2.028	1	0.4125
11	rs2289989	36290278	T	0.2227	0.3261	C	11.4	7.355 x 10-4	0.592	0.157	0.4352	0.8053	1	0.4125
11	rs1866768	134274710	G	0.1008	0.1866	A	11.39	7.368 x 10-4	0.4888	0.2165	0.3198	0.7472	1	0.4125
11	rs7120821	44698662	A	0.2815	0.1939	G	11.39	7.391 x 10-4	1.629	0.1459	1.224	2.168	1	0.4125
10	rs2995648	13967259	A	0.4706	0.3643	G	11.36	7.494 x 10-4	1.551	0.1312	1.199	2.006	1	0.4125
2	rs191568463	26700065	A	0.008403	9.883E-4	T	11.36	7.496 x 10-4	8.566	0.7666	1.907	38.49	1	0.4125
5	rs2112167	86409417	T	0.008403	9.883E-4	C	11.36	7.496 x 10-4	8.566	0.7666	1.907	38.49	1	0.4125
8	rs147186110	42178259	A	0.008403	9.883E-4	G	11.36	7.496 x 10-4	8.566	0.7666	1.907	38.49	1	0.4125
10	rs149455520	34558715	T	0.008403	9.883E-4	C	11.36	7.496 x 10-4	8.566	0.7666	1.907	38.49	1	0.4125
11	rs2276427	62010944	C	0.008403	9.883E-4	T	11.36	7.496 x 10-4	8.566	0.7666	1.907	38.49	1	0.4125
22	rs113437301	42482252	A	0.008403	9.883E-4	G	11.36	7.496 x 10-4	8.566	0.7666	1.907	38.49	1	0.4125
5	rs32778	35379582	A	0.01695	0.003462	G	11.36	7.498 x 10-4	4.962	0.5274	1.765	13.95	1	0.4125
1	rs199892357	186329959	G	0.008403	9.885E-4	A	11.36	7.505 x 10-4	8.565	0.7666	1.906	38.48	1	0.4125
2	rs141350086	70406718	A	0.008403	9.885E-4	C	11.36	7.505 x 10-4	8.565	0.7666	1.906	38.48	1	0.4125
4	rs202198134	17635400	C	0.008403	9.885E-4	T	11.36	7.505 x 10-4	8.565	0.7666	1.906	38.48	1	0.4125
3	rs17849129	47459050	T	0.008403	9.888E-4	C	11.36	7.524 x 10-4	8.562	0.7666	1.906	38.47	1	0.4125
5	rs6897630	150545400	G	0.008403	9.888E-4	A	11.36	7.524 x 10-4	8.562	0.7666	1.906	38.47	1	0.4125
2	rs7420310	76583236	C	0.359	0.2611	T	11.35	7.542 x 10-4	1.585	0.1379	1.21	2.077	1	0.4125
16	rs200141222	2218090	A	0.008403	9.891E-4	G	11.35	7.544 x 10-4	8.559	0.7666	1.905	38.46	1	0.4125
6	rs35220041	143784092	G	0.008403	9.893E-4	A	11.35	7.553 x 10-4	8.558	0.7666	1.905	38.45	1	0.4125
18	rs11875425	39115504	T	0.008403	9.893E-4	C	11.35	7.553 x 10-4	8.558	0.7666	1.905	38.45	1	0.4125
4	rs4577572	14751518	C	0.2857	0.1977	T	11.33	7.63 x 10-4	1.623	0.1453	1.221	2.158	1	0.4153
4	rs6823272	63084429	A	0.4622	0.3566	G	11.32	7.676 x 10-4	1.551	0.1314	1.199	2.006	1	0.4165
20	rs8120836	17993460	G	0.09052	0.04417	A	11.3	7.734 x 10-4	2.154	0.2337	1.362	3.405	1	0.4183
1	rs6604654	217279717	C	0.1681	0.1013	T	11.3	7.77 x 10-4	1.792	0.1759	1.269	2.53	1	0.4188
11	rs11232153	80182109	G	0.1555	0.09167	T	11.27	7.857 x 10-4	1.824	0.1816	1.278	2.604	1	0.4221
10	rs17737062	105269873	G	0.3147	0.222	A	11.24	7.992 x 10-4	1.609	0.1431	1.215	2.129	1	0.4246
13	rs9586179	104060087	C	0.06303	0.02701	T	11.24	8.017 x 10-4	2.423	0.2726	1.42	4.133	1	0.4246
8	rs3857894	97741971	G	0.5508	0.4414	A	11.24	8.023 x 10-4	1.552	0.1321	1.198	2.011	1	0.4246
17	rs148980412	4648628	A	0.01681	0.003459	G	11.23	8.031 x 10-4	4.925	0.5274	1.752	13.85	1	0.4246
16	rs7188895	10081772	T	0.5966	0.487	G	11.23	8.033 x 10-4	1.558	0.1334	1.2	2.024	1	0.4246
12	rs2464266	115840082	T	0.06723	0.1439	C	11.23	8.058 x 10-4	0.4289	0.2601	0.2576	0.7141	1	0.4246
6	rs1575341	169166139	A	0.1597	0.255	G	11.22	8.103 x 10-4	0.5551	0.1782	0.3915	0.7872	1	0.4256
6	rs4389803	2981772	G	0.3866	0.496	A	11.19	8.242 x 10-4	0.6403	0.1344	0.492	0.8332	1	0.4307
19	rs144309712	43420313	T	0.0	0.04494	C	11.18	8.288 x 10-4	0.0	inf	0.0	nan	1	0.4307
2	rs3770951	36601151	T	0.2395	0.1591	C	11.17	8.292 x 10-4	1.664	0.1539	1.231	2.25	1	0.4307
14	rs2229463	24718515	G	0.05983	0.1348	A	11.17	8.323 x 10-4	0.4084	0.2769	0.2373	0.7027	1	0.4307
12	rs75025746	22814023	G	0.06723	0.02968	A	11.16	8.338 x 10-4	2.356	0.2643	1.404	3.956	1	0.4307
1	rs9730058	232242925	C	0.3739	0.276	A	11.16	8.358 x 10-4	1.567	0.1355	1.201	2.043	1	0.4307
3	rs4682543	109761983	G	0.1765	0.1082	A	11.15	8.391 x 10-4	1.766	0.1725	1.259	2.477	1	0.4311
14	rs189768438	104640630	T	0.0	0.04478	C	11.14	8.449 x 10-4	0.0	inf	0.0	nan	1	0.4327
16	rs140355892	2025587	T	0.0	0.047	C	11.13	8.477 x 10-4	0.0	inf	0.0	nan	1	0.4328
8	rs2738050	6721326	C	0.3305	0.4391	T	11.1	8.648 x 10-4	0.6306	0.1396	0.4797	0.829	1	0.4401
7	rs35806255	32712414	T	0.2269	0.149	C	11.08	8.746 x 10-4	1.676	0.1569	1.233	2.279	1	0.443
4	rs6533729	114833290	G	0.3109	0.2204	A	11.07	8.763 x 10-4	1.596	0.1417	1.209	2.107	1	0.443
8	rs9314293	24430258	C	0.4034	0.3031	A	11.07	8.784 x 10-4	1.554	0.1336	1.196	2.02	1	0.443
13	rs17081231	66967622	G	0.04202	0.01507	A	11.04	8.901 x 10-4	2.866	0.3316	1.497	5.49	1	0.4475
6	rs4708508	169265795	C	0.08824	0.04349	T	11.03	8.965 x 10-4	2.129	0.2328	1.349	3.36	1	0.4493
2	rs1427396	153735193	T	0.2605	0.1773	C	10.99	9.143 x 10-4	1.634	0.1496	1.219	2.191	1	0.4551
5	rs6891999	75549507	C	0.1345	0.2248	T	10.98	9.185 x 10-4	0.5358	0.1913	0.3683	0.7795	1	0.4551
3	rs794187	4436172	T	0.2605	0.3648	C	10.98	9.188 x 10-4	0.6134	0.1489	0.4581	0.8212	1	0.4551
15	rs4779824	31404294	T	0.5756	0.4674	C	10.98	9.195 x 10-4	1.546	0.1324	1.192	2.004	1	0.4551
11	rs746890	36286635	T	0.3151	0.2244	C	10.97	9.243 x 10-4	1.59	0.1412	1.206	2.097	1	0.4551
4	rs17041550	162719690	G	0.05882	0.02472	A	10.97	9.246 x 10-4	2.465	0.2816	1.42	4.282	1	0.4551
19	rs56084515	17566562	A	0.02101	0.005106	G	10.97	9.278 x 10-4	4.181	0.4696	1.666	10.5	1	0.4553
5	rs269876	22591057	A	0.2585	0.3629	C	10.95	9.341 x 10-4	0.6118	0.1499	0.4561	0.8207	1	0.4566
2	rs11691237	127842383	T	0.1532	0.25	C	10.95	9.376 x 10-4	0.5426	0.1876	0.3756	0.7837	1	0.4566
15	rs58174009	74637475	T	0.01261	0.002141	C	10.94	9.431 x 10-4	5.949	0.6133	1.788	19.79	1	0.4566
10	rs150771853	70968696	G	0.01261	0.002142	A	10.93	9.444 x 10-4	5.948	0.6133	1.788	19.79	1	0.4566
15	rs2229515	30018627	C	0.1639	0.0989	T	10.93	9.444 x 10-4	1.786	0.1777	1.26	2.53	1	0.4566
15	rs8024991	95411105	C	0.3347	0.2416	T	10.91	9.569 x 10-4	1.58	0.1396	1.202	2.077	1	0.4609
14	rs150037646	50550557	T	0.01261	0.002146	C	10.91	9.587 x 10-4	5.937	0.6133	1.785	19.75	1	0.4609
1	rs12144325	55248074	G	0.1019	0.1933	A	10.9	9.622 x 10-4	0.4738	0.2315	0.301	0.7458	1	0.4612
6	rs708057	6523310	T	0.4706	0.3664	C	10.89	9.68 x 10-4	1.537	0.1312	1.188	1.988	1	0.4619
20	rs1576399	51463827	T	0.06723	0.02998	C	10.89	9.694 x 10-4	2.332	0.2643	1.389	3.915	1	0.4619
20	rs6079926	15654842	G	0.2395	0.16	A	10.88	9.739 x 10-4	1.653	0.1539	1.222	2.235	1	0.4627
2	rs13393577	213296863	C	0.1186	0.06488	T	10.87	9.789 x 10-4	1.94	0.2047	1.299	2.898	1	0.4638
4	rs6824816	139648420	C	0.3739	0.4817	T	10.86	9.817 x 10-4	0.6427	0.1352	0.4931	0.8376	1	0.4638
17	rs902729	72955523	T	0.416	0.3156	C	10.85	9.875 x 10-4	1.545	0.133	1.19	2.004	1	0.4642
11	rs1746942	29897759	C	0.3368	0.4568	T	10.85	9.882 x 10-4	0.6041	0.1546	0.4462	0.8179	1	0.4642
2	rs3768842	183704583	C	0.3729	0.2759	T	10.84	9.921 x 10-4	1.56	0.1361	1.195	2.037	1	0.4642
11	rs10898032	82512587	A	0.3992	0.3002	G	10.84	9.94 x 10-4	1.549	0.1338	1.191	2.013	1	0.4642
3	rs13096639	105965996	T	0.3193	0.2286	C	10.83	9.974 x 10-4	1.583	0.1407	1.201	2.086	1	0.4645
16	rs4785884	65993854	T	0.2185	0.1428	G	10.82	0.001002	1.678	0.159	1.229	2.291	1	0.4652
15	rs11558807	41046883	A	0.07563	0.03542	C	10.82	0.001004	2.228	0.25	1.365	3.637	1	0.4652
13	rs11566	75859067	A	0.01681	0.003551	G	10.81	0.001007	4.796	0.5269	1.708	13.47	1	0.4652
7	rs3112362	135404841	T	0.3571	0.2624	C	10.79	0.001021	1.562	0.1368	1.195	2.043	1	0.47
13	rs7339285	26680704	C	0.2353	0.1568	T	10.78	0.001025	1.654	0.1548	1.221	2.241	1	0.47
4	rs17011180	127440570	C	0.2101	0.1361	T	10.78	0.001026	1.688	0.1613	1.231	2.316	1	0.47
7	rs3112358	135400731	T	0.2269	0.1499	C	10.77	0.00103	1.664	0.1568	1.224	2.263	1	0.4703
19	rs1129763	8121369	T	0.2479	0.1674	C	10.76	0.001036	1.639	0.1521	1.217	2.208	1	0.4719
8	rs3860880	809497	G	0.3613	0.4684	T	10.74	0.001046	0.6422	0.1362	0.4918	0.8386	1	0.4749
1	rs2743208	19017855	C	0.1975	0.126	T	10.73	0.001056	1.707	0.1651	1.235	2.359	1	0.4783
9	rs200590919	131196799	C	0.0	0.04315	T	10.71	0.001064	0.0	inf	0.0	nan	1	0.4783
8	rs13255694	24339679	A	0.4118	0.3123	G	10.71	0.001065	1.541	0.1332	1.187	2.001	1	0.4783
11	rs7930503	70882388	T	0.2958	0.4325	G	10.7	0.001069	0.551	0.1848	0.3836	0.7915	1	0.4783
7	rs34683490	32712700	G	0.2269	0.1501	A	10.7	0.001074	1.661	0.1568	1.222	2.259	1	0.4783
3	rs145799134	57415434	G	0.02101	0.005189	T	10.69	0.001075	4.114	0.4693	1.64	10.32	1	0.4783
7	rs1049394	29960804	T	0.4454	0.3436	C	10.69	0.001076	1.534	0.1318	1.185	1.986	1	0.4783
8	rs13250765	24416733	T	0.4034	0.3047	C	10.68	0.001082	1.543	0.1336	1.187	2.004	1	0.4783
3	rs1496652	60236298	C	0.3529	0.259	T	10.68	0.001083	1.56	0.1372	1.192	2.042	1	0.4783
1	rs72703216	109837853	A	0.02941	0.008895	G	10.68	0.001085	3.377	0.3956	1.555	7.332	1	0.4783
14	rs12895740	86114343	T	0.1807	0.1127	C	10.68	0.001086	1.736	0.1709	1.242	2.427	1	0.4783
4	rs4543173	186677253	A	0.3686	0.4759	G	10.67	0.001088	0.6431	0.1362	0.4924	0.8398	1	0.4783
11	rs771775222	8934081	A	0.0	0.04298	G	10.65	0.001102	0.0	inf	0.0	nan	1	0.4826
14	rs28711516	23876267	T	0.1639	0.09957	C	10.64	0.001104	1.772	0.1777	1.251	2.511	1	0.4826
20	rs6055485	8016252	C	0.1134	0.1985	T	10.63	0.001113	0.5167	0.2061	0.345	0.7739	1	0.4849
13	rs17511627	26724328	C	0.2395	0.1608	A	10.63	0.001115	1.643	0.1539	1.215	2.222	1	0.4849
4	rs17294252	138801097	A	0.1261	0.2131	C	10.61	0.001128	0.5326	0.1966	0.3624	0.783	1	0.4889
2	rs13006169	4659821	G	0.05769	0.1352	A	10.59	0.001136	0.3916	0.2986	0.2181	0.7031	1	0.4889
6	rs4415130	72408820	C	0.3655	0.4718	T	10.59	0.001139	0.6449	0.1358	0.4942	0.8417	1	0.4889
3	rs6764038	88482992	T	0.3277	0.4332	G	10.58	0.001141	0.6379	0.1393	0.4855	0.8381	1	0.4889
1	rs2686226	241376512	T	0.2353	0.1575	C	10.57	0.001147	1.646	0.1548	1.215	2.23	1	0.4889
11	rs583790	107367741	C	0.06723	0.03033	T	10.57	0.00115	2.305	0.2642	1.373	3.868	1	0.4889
6	rs2050613	114597419	T	0.3361	0.4417	C	10.56	0.001154	0.6399	0.1384	0.4879	0.8394	1	0.4889
6	rs115709409	30993776	T	0.1239	0.06825	A	10.56	0.001158	1.93	0.206	1.289	2.891	1	0.4889
1	rs11206718	56502227	A	0.4538	0.3521	G	10.55	0.001163	1.529	0.1316	1.181	1.978	1	0.4889
6	rs9369324	41993007	A	0.4449	0.3434	G	10.55	0.001165	1.532	0.1324	1.182	1.986	1	0.4889
14	rs2065999	54656551	C	0.521	0.4162	T	10.54	0.001167	1.526	0.1311	1.18	1.973	1	0.4889
3	rs17217776	185295704	A	0.1555	0.09331	G	10.54	0.001171	1.789	0.1816	1.253	2.553	1	0.4889
3	rs9835250	79907219	T	0.2395	0.34	C	10.53	0.001173	0.6114	0.1531	0.4529	0.8253	1	0.4889
3	rs2276802	178968568	C	0.01271	0.002224	A	10.53	0.001173	5.777	0.6122	1.74	19.18	1	0.4889
11	rs10128543	76420184	G	0.563	0.4572	A	10.53	0.001175	1.53	0.132	1.181	1.981	1	0.4889
1	rs61733187	44056889	T	0.0	0.04239	C	10.52	0.001178	0.0	inf	0.0	nan	1	0.4889
2	rs11890114	81676394	C	0.2269	0.1507	T	10.52	0.001182	1.655	0.1568	1.217	2.25	1	0.4889
7	rs6976167	104060973	A	0.1849	0.1165	G	10.51	0.001185	1.721	0.1694	1.235	2.398	1	0.4889
12	rs146932871	46764973	A	0.01681	0.003624	G	10.5	0.001191	4.7	0.5264	1.675	13.19	1	0.4889
5	rs7729113	179650920	A	0.4958	0.3922	G	10.49	0.001199	1.524	0.131	1.179	1.97	1	0.4889
10	rs17093759	82382102	C	0.1176	0.2026	T	10.48	0.001206	0.5249	0.2025	0.353	0.7806	1	0.4889
2	rs16866119	225563591	A	0.1036	0.1892	G	10.48	0.001208	0.4952	0.2215	0.3208	0.7644	1	0.4889
8	rs116702311	8234187	T	0.0	0.04214	C	10.46	0.001222	0.0	inf	0.0	nan	1	0.4889
6	rs7770412	33373341	T	0.04592	0.01615	C	10.46	0.001223	2.932	0.3488	1.48	5.808	1	0.4889
13	rs9561863	96027408	A	0.3319	0.2412	G	10.44	0.001233	1.563	0.1393	1.189	2.053	1	0.4889
13	rs4299049	42173787	A	0.2983	0.4019	G	10.43	0.001241	0.6328	0.1429	0.4782	0.8373	1	0.4889
11	rs12280225	89474047	T	0.2143	0.1405	C	10.42	0.001247	1.668	0.1601	1.219	2.283	1	0.4889
10	rs201688627	27329059	A	0.01261	0.002224	C	10.41	0.001256	5.728	0.6121	1.726	19.01	1	0.4889
10	rs140899994	115922933	A	0.01261	0.002224	C	10.41	0.001256	5.728	0.6121	1.726	19.01	1	0.4889
12	rs144902333	114387907	A	0.01261	0.002224	T	10.4	0.001257	5.727	0.6121	1.725	19.01	1	0.4889
15	rs144338336	66813452	T	0.01261	0.002225	C	10.4	0.001261	5.725	0.6121	1.725	19.0	1	0.4889
17	rs148844016	4446447	A	0.01261	0.002225	G	10.4	0.001262	5.724	0.6121	1.725	19.0	1	0.4889
10	rs868093	26705832	C	0.3782	0.4835	T	10.38	0.001272	0.6495	0.1349	0.4986	0.8461	1	0.4889
12	rs2230383	26868289	T	0.02101	0.00528	C	10.38	0.001276	4.043	0.4696	1.61	10.15	1	0.4889
2	rs146566014	220103266	T	0.008403	0.001071	C	10.37	0.00128	7.907	0.7624	1.774	35.23	1	0.4889
3	rs1876039	24319119	C	0.008403	0.001071	T	10.37	0.00128	7.907	0.7624	1.774	35.23	1	0.4889
4	rs9994327	43440641	G	0.008403	0.001071	A	10.37	0.00128	7.907	0.7624	1.774	35.23	1	0.4889
5	rs148097083	89943581	A	0.008403	0.001071	G	10.37	0.00128	7.907	0.7624	1.774	35.23	1	0.4889
10	rs141572603	102269110	A	0.008403	0.001071	G	10.37	0.00128	7.907	0.7624	1.774	35.23	1	0.4889
15	rs150110779	40594346	A	0.008403	0.001071	G	10.37	0.00128	7.907	0.7624	1.774	35.23	1	0.4889
16	rs34106627	83816871	G	0.008403	0.001071	T	10.37	0.00128	7.907	0.7624	1.774	35.23	1	0.4889
9	rs201096994	5968303	C	0.008403	0.001071	T	10.37	0.001281	7.905	0.7624	1.774	35.23	1	0.4889
9	rs148628855	131196429	T	0.008403	0.001071	C	10.37	0.001281	7.905	0.7624	1.774	35.23	1	0.4889
20	rs2873522	1419526	G	0.1807	0.1135	T	10.37	0.001282	1.722	0.1709	1.232	2.408	1	0.4889
1	rs140410413	156206155	T	0.008403	0.001071	C	10.37	0.001283	7.904	0.7624	1.774	35.22	1	0.4889
7	rs151249549	29966229	C	0.008403	0.001071	T	10.37	0.001283	7.904	0.7624	1.774	35.22	1	0.4889
8	rs7837658	101283085	T	0.008403	0.001071	C	10.37	0.001283	7.904	0.7624	1.774	35.22	1	0.4889
11	rs114062454	62037726	G	0.008403	0.001071	C	10.37	0.001283	7.904	0.7624	1.774	35.22	1	0.4889
14	rs141191522	73412626	C	0.008403	0.001071	A	10.37	0.001283	7.904	0.7624	1.774	35.22	1	0.4889
19	rs7260523	46583839	A	0.1134	0.06218	G	10.37	0.001283	1.93	0.2078	1.284	2.9	1	0.4889
3	rs144324988	66457776	T	0.008403	0.001071	C	10.36	0.001285	7.903	0.7624	1.774	35.22	1	0.4889
11	rs200223916	104762062	T	0.008403	0.001071	C	10.36	0.001285	7.903	0.7624	1.774	35.22	1	0.4889
14	rs201349357	52899110	C	0.008403	0.001072	A	10.36	0.001288	7.9	0.7624	1.773	35.2	1	0.4889
9	rs150367385	134394834	G	0.008403	0.001072	C	10.36	0.001289	7.899	0.7624	1.773	35.2	1	0.4889
9	rs76312873	35906469	A	0.008403	0.001072	G	10.36	0.001291	7.898	0.7624	1.772	35.19	1	0.4889
5	rs3098378	71467670	C	0.2938	0.4201	T	10.35	0.001292	0.5742	0.1745	0.4079	0.8085	1	0.4889
10	rs34427437	101981878	A	0.008403	0.001072	T	10.35	0.001294	7.895	0.7624	1.772	35.18	1	0.4889
10	rs35178103	124753444	G	0.008403	0.001073	A	10.34	0.001298	7.891	0.7624	1.771	35.16	1	0.489
4	rs146547227	1739379	A	0.008403	0.001073	G	10.34	0.0013	7.89	0.7624	1.771	35.16	1	0.489
7	rs199986352	76024638	C	0.008403	0.001073	G	10.34	0.001305	7.886	0.7624	1.77	35.14	1	0.4897
15	rs17302066	59205253	C	0.03782	0.1008	A	10.32	0.001315	0.3507	0.3412	0.1797	0.6844	1	0.492
1	rs4661330	15687059	G	0.3529	0.2605	A	10.32	0.001317	1.549	0.1372	1.184	2.027	1	0.492
18	rs199787538	60645678	T	0.0	0.04161	C	10.31	0.001322	0.0	inf	0.0	nan	1	0.4926
9	rs911928	101590318	G	0.3866	0.4916	A	10.31	0.001325	0.6517	0.1343	0.5008	0.848	1	0.4928
14	rs17659488	46794184	G	0.1387	0.08099	T	10.3	0.001329	1.827	0.1905	1.258	2.654	1	0.4931
4	rs12506794	167454287	T	0.008403	0.001077	C	10.29	0.001338	7.859	0.7624	1.764	35.02	1	0.4932
12	rs10840868	17962860	C	0.3739	0.2795	T	10.29	0.001338	1.539	0.1355	1.18	2.008	1	0.4932
20	rs8124710	8766781	T	0.02941	0.009079	C	10.29	0.00134	3.307	0.3954	1.524	7.179	1	0.4932
20	rs968162	51037837	A	0.3235	0.2344	G	10.28	0.001343	1.562	0.1402	1.187	2.056	1	0.4932
5	rs10075474	129555759	C	0.1008	0.1814	T	10.28	0.001345	0.5059	0.2166	0.331	0.7735	1	0.4932
19	rs11671664	46172278	A	0.1807	0.1137	G	10.27	0.001349	1.718	0.1709	1.229	2.402	1	0.4932
14	rs4433730	54717657	A	0.5551	0.4502	G	10.27	0.00135	1.523	0.1323	1.176	1.974	1	0.4932
12	rs35955700	17073360	C	0.2059	0.1341	T	10.27	0.001354	1.674	0.1625	1.217	2.302	1	0.4932
18	rs1857705	26131117	T	0.2857	0.2014	C	10.26	0.001356	1.586	0.1453	1.193	2.109	1	0.4932
2	rs2111349	83094402	G	0.4916	0.3893	A	10.25	0.001364	1.517	0.131	1.173	1.961	1	0.4944
2	rs2969312	52566298	G	0.105	0.05634	A	10.25	0.001365	1.966	0.215	1.29	2.996	1	0.4944
4	rs3822223	26321906	A	0.06723	0.1395	C	10.25	0.00137	0.4445	0.2602	0.2669	0.7402	1	0.4948
13	rs9536323	53540858	T	0.3908	0.2951	C	10.23	0.00138	1.532	0.1343	1.177	1.994	1	0.4974
13	rs1380808	72628880	T	0.1891	0.2832	C	10.23	0.001383	0.5901	0.1668	0.4256	0.8183	1	0.4975
1	rs6680824	42236004	T	0.521	0.4178	C	10.2	0.001404	1.516	0.1311	1.172	1.959	1	0.5032
1	rs144420685	160062453	T	0.01261	0.002256	C	10.2	0.001407	5.647	0.6121	1.701	18.74	1	0.5032
1	rs560681	160786670	G	0.437	0.338	A	10.19	0.001411	1.52	0.1321	1.173	1.969	1	0.5032
17	rs150914837	79892802	A	0.0	0.04109	G	10.19	0.001415	0.0	inf	0.0	nan	1	0.5032
15	rs12593813	68036852	A	0.2178	0.3236	G	10.18	0.001418	0.5821	0.1716	0.4159	0.8148	1	0.5032
1	rs2207524	184369713	G	0.008403	0.001087	T	10.18	0.001424	7.791	0.7624	1.748	34.72	1	0.5032
4	rs12505892	173179915	T	0.1597	0.0974	G	10.17	0.001424	1.761	0.1797	1.238	2.504	1	0.5032
5	rs632909	32487636	G	0.1933	0.2876	A	10.17	0.001425	0.5935	0.1654	0.4292	0.8207	1	0.5032
1	rs10923457	118530065	C	0.1176	0.06561	T	10.17	0.001431	1.899	0.2045	1.272	2.835	1	0.5032
8	rs201295180	145234364	T	0.01681	0.003706	C	10.16	0.001434	4.595	0.5259	1.639	12.88	1	0.5032
19	rs61910733	38189555	C	0.01681	0.003706	T	10.16	0.001434	4.595	0.5259	1.639	12.88	1	0.5032
1	rs765040	42239717	T	0.521	0.418	C	10.16	0.001436	1.514	0.1311	1.171	1.958	1	0.5032
3	rs75692599	9965582	A	0.05462	0.02298	G	10.15	0.001444	2.457	0.2916	1.387	4.351	1	0.5032
7	rs11975146	25563961	A	0.3571	0.461	G	10.15	0.001445	0.6494	0.1365	0.497	0.8486	1	0.5032
13	rs11147512	33757815	A	0.3655	0.2725	G	10.14	0.001447	1.538	0.1361	1.178	2.008	1	0.5032
15	rs1863270	61012259	C	0.3866	0.2916	A	10.14	0.00145	1.53	0.1346	1.176	1.993	1	0.5032
6	rs9374702	118352676	A	0.2017	0.2967	G	10.14	0.001451	0.5988	0.1628	0.4352	0.8238	1	0.5032
10	rs117144385	106401380	A	0.1864	0.1185	G	10.13	0.001462	1.705	0.1696	1.223	2.377	1	0.5033
7	rs10429035	96119481	A	0.1653	0.2563	G	10.12	0.001466	0.5743	0.1765	0.4064	0.8117	1	0.5033
16	rs2074524	3535028	A	0.07983	0.03907	G	10.12	0.001467	2.134	0.2439	1.323	3.442	1	0.5033
2	rs147359626	242511751	T	0.0	0.04085	C	10.12	0.001468	0.0	inf	0.0	nan	1	0.5033
17	rs7214374	71769077	A	0.3739	0.4779	G	10.12	0.001469	0.6525	0.1352	0.5006	0.8505	1	0.5033
4	rs2510802	95410168	G	0.3025	0.2165	A	10.11	0.001471	1.569	0.1428	1.186	2.076	1	0.5033
2	rs2287631	207603234	G	0.06303	0.1335	T	10.11	0.001474	0.4366	0.2681	0.2581	0.7383	1	0.5033
3	rs7629386	40966907	T	0.4076	0.3111	C	10.1	0.001479	1.523	0.1334	1.173	1.979	1	0.5033
12	rs4766306	5004332	G	0.2185	0.145	A	10.1	0.001481	1.649	0.159	1.208	2.252	1	0.5033
6	rs785143	114645237	G	0.2119	0.3081	A	10.1	0.001486	0.6036	0.1605	0.4407	0.8267	1	0.5033
1	rs199851348	223567028	T	0.0	0.04074	C	10.09	0.001487	0.0	inf	0.0	nan	1	0.5033
12	rs876643	24394579	T	0.1471	0.235	C	10.09	0.001488	0.5612	0.1843	0.3911	0.8054	1	0.5033
8	rs13249144	8394297	C	0.3908	0.4946	T	10.07	0.001506	0.6553	0.1341	0.5038	0.8523	1	0.5083
12	rs10840939	18194578	G	0.3109	0.2241	A	10.07	0.001509	1.562	0.1417	1.183	2.062	1	0.5084
11	rs201912778	113644311	A	0.0	0.04054	G	10.05	0.001527	0.0	inf	0.0	nan	1	0.5132
14	rs148639432	96730440	T	0.0	0.04054	C	10.04	0.00153	0.0	inf	0.0	nan	1	0.5132
7	rs34729538	5413923	T	0.05042	0.02059	C	10.03	0.001543	2.526	0.3031	1.395	4.575	1	0.5158
2	rs16985353	18811566	G	0.07563	0.1492	A	10.02	0.001545	0.4667	0.2465	0.2879	0.7565	1	0.5158
2	rs150509214	239161644	G	0.0	0.04044	A	10.02	0.00155	0.0	inf	0.0	nan	1	0.5158
13	rs4548740	58813250	G	0.1555	0.2444	A	10.02	0.00155	0.5692	0.1803	0.3998	0.8105	1	0.5158
1	rs6697185	170564545	A	0.02101	0.00541	G	9.995	0.001569	3.945	0.4688	1.574	9.887	1	0.5209
6	rs115872183	54805279	T	0.02941	0.009224	C	9.993	0.001572	3.255	0.3952	1.5	7.062	1	0.5209
2	rs4670944	39778109	G	0.5924	0.489	A	9.984	0.001579	1.519	0.1332	1.17	1.972	1	0.5223
19	rs1862479	51029602	C	0.2437	0.3416	T	9.979	0.001583	0.621	0.1522	0.4608	0.8368	1	0.5227
16	rs6498513	14488130	G	0.2415	0.3396	A	9.964	0.001596	0.6191	0.1533	0.4584	0.8361	1	0.5256
7	rs190991016	48318614	G	0.01695	0.003791	T	9.956	0.001603	4.531	0.5255	1.618	12.69	1	0.5256
7	rs4148824	87075362	G	0.2353	0.1594	A	9.946	0.001612	1.622	0.1548	1.198	2.197	1	0.5256
21	rs2822641	15747503	A	0.06303	0.02837	C	9.944	0.001614	2.304	0.2723	1.351	3.928	1	0.5256
8	rs2174097	813942	T	0.4286	0.3313	C	9.941	0.001616	1.514	0.1324	1.168	1.962	1	0.5256
17	rs117767867	6946330	T	0.02101	0.005428	C	9.939	0.001618	3.932	0.4688	1.569	9.854	1	0.5256
19	rs2015	39369369	G	0.3235	0.4255	T	9.939	0.001618	0.6457	0.1398	0.491	0.8493	1	0.5256
6	rs6932793	117772143	G	0.2899	0.2062	A	9.938	0.001619	1.572	0.1446	1.184	2.087	1	0.5256
1	rs6660751	64412138	C	0.2437	0.1666	T	9.936	0.001621	1.612	0.1529	1.195	2.176	1	0.5256
7	rs2192341	8261730	G	0.1471	0.08824	A	9.925	0.001631	1.782	0.1858	1.238	2.564	1	0.5272
15	rs7178935	59368167	A	0.1555	0.2438	G	9.923	0.001632	0.571	0.1801	0.4012	0.8128	1	0.5272
5	rs61743184	140579834	A	0.03361	0.01137	G	9.907	0.001646	3.025	0.3697	1.465	6.242	1	0.5301
13	rs4771262	97687414	A	0.3664	0.4706	G	9.906	0.001648	0.6506	0.1376	0.4968	0.852	1	0.5301
8	rs7002775	91476765	G	0.2353	0.3322	A	9.9	0.001653	0.6187	0.154	0.4575	0.8367	1	0.5301
1	rs144632025	11106630	A	0.01261	0.002308	G	9.898	0.001654	5.518	0.6111	1.666	18.28	1	0.5301
5	rs7733163	31982409	A	0.5084	0.4072	G	9.893	0.001659	1.506	0.131	1.165	1.946	1	0.5301
2	rs35349461	39088786	C	0.01261	0.002309	T	9.891	0.001661	5.515	0.6111	1.665	18.27	1	0.5301
9	rs12683594	127205611	G	0.08403	0.04226	A	9.887	0.001665	2.079	0.238	1.304	3.315	1	0.5304
7	rs4422672	62203031	C	0.2391	0.338	A	9.878	0.001673	0.6157	0.1558	0.4537	0.8355	1	0.5319
3	rs61736214	111697922	C	0.0	0.04016	G	9.865	0.001685	0.0	inf	0.0	nan	1	0.5338
4	rs17798302	181529714	G	0.2479	0.3455	T	9.858	0.001691	0.6244	0.1513	0.4642	0.84	1	0.5338
11	rs117277258	124310273	T	0.01261	0.002315	C	9.858	0.001691	5.502	0.6111	1.661	18.22	1	0.5338
2	rs12614438	134501131	C	0.3697	0.2775	T	9.857	0.001692	1.527	0.1358	1.17	1.993	1	0.5338
6	rs639954	143051810	T	0.437	0.3396	C	9.836	0.001711	1.509	0.1321	1.165	1.955	1	0.5383
19	rs143550497	31039257	A	0.01681	0.003789	G	9.835	0.001713	4.495	0.5254	1.605	12.59	1	0.5383
8	rs12550813	75432528	G	0.1134	0.06318	T	9.825	0.001722	1.897	0.2078	1.263	2.851	1	0.5402
1	rs2099684	161500130	G	0.458	0.3594	A	9.82	0.001726	1.506	0.1315	1.164	1.948	1	0.5405
3	rs6444753	193589457	A	0.05042	0.1157	G	9.808	0.001737	0.4059	0.2976	0.2265	0.7274	1	0.5419
17	rs713238	55713999	G	0.395	0.4974	A	9.808	0.001738	0.6595	0.1338	0.5073	0.8573	1	0.5419
11	rs7941838	74757641	G	0.1134	0.1944	A	9.804	0.001742	0.5301	0.206	0.354	0.7939	1	0.5419
18	rs12953840	65179657	C	0.02521	0.00733	T	9.8	0.001745	3.502	0.427	1.517	8.087	1	0.5419
4	rs1435497	182434469	T	0.2479	0.3452	C	9.796	0.001749	0.6253	0.1513	0.4648	0.8412	1	0.5419
3	rs11916404	190188644	T	0.2983	0.2141	C	9.793	0.001752	1.561	0.1434	1.178	2.067	1	0.5419
20	rs21140	14853050	T	0.4454	0.3477	C	9.791	0.001754	1.506	0.1318	1.163	1.95	1	0.5419
11	rs11036223	41104950	C	0.1008	0.05415	T	9.78	0.001764	1.959	0.219	1.275	3.009	1	0.5442
18	rs784240	53434122	C	0.08824	0.04532	T	9.767	0.001777	2.039	0.2327	1.292	3.216	1	0.5464
13	rs3742185	111532288	A	0.04622	0.01837	G	9.765	0.001779	2.59	0.316	1.394	4.812	1	0.5464
4	rs2433317	95428800	G	0.3151	0.229	A	9.759	0.001784	1.549	0.1412	1.175	2.043	1	0.5464
6	rs10943413	77798214	G	0.3151	0.229	A	9.759	0.001785	1.549	0.1412	1.175	2.043	1	0.5464
11	rs518547	116738046	G	0.3151	0.229	A	9.754	0.001789	1.549	0.1412	1.175	2.043	1	0.5468
17	rs72830046	39620565	T	0.3771	0.2844	C	9.742	0.001801	1.524	0.1358	1.167	1.988	1	0.548
9	rs7868175	6658080	G	0.09664	0.1738	A	9.739	0.001804	0.5086	0.2207	0.33	0.7839	1	0.548
9	rs10817260	114828332	T	0.1134	0.1941	C	9.739	0.001804	0.5313	0.2059	0.3549	0.7955	1	0.548
9	rs3957512	96612770	G	0.1765	0.2666	A	9.736	0.001807	0.5894	0.1713	0.4213	0.8246	1	0.548
3	rs6808808	185501238	A	0.06303	0.02862	G	9.724	0.001819	2.283	0.2722	1.339	3.893	1	0.5502
2	rs1435883	81642505	G	0.4328	0.3362	A	9.719	0.001824	1.506	0.1322	1.162	1.952	1	0.5502
5	rs1025963	38565639	G	0.4328	0.3362	A	9.719	0.001824	1.506	0.1322	1.162	1.952	1	0.5502
13	rs4769468	26693061	C	0.2227	0.1497	T	9.704	0.001839	1.628	0.1579	1.194	2.218	1	0.553
12	rs11178234	70819638	A	0.1667	0.265	G	9.699	0.001844	0.5549	0.1918	0.381	0.8081	1	0.553
18	rs7242532	57113104	T	0.4244	0.3285	C	9.698	0.001845	1.507	0.1326	1.162	1.954	1	0.553
3	rs420537	11886751	A	0.5798	0.478	G	9.696	0.001847	1.507	0.1326	1.162	1.954	1	0.553
12	rs11831821	45477307	T	0.02101	0.005518	C	9.687	0.001856	3.867	0.4683	1.545	9.684	1	0.5539
11	rs324172	21952288	A	0.4454	0.3482	G	9.684	0.001859	1.503	0.1318	1.161	1.946	1	0.5539
3	rs9875124	189010687	A	0.3445	0.4457	G	9.681	0.001862	0.6537	0.1376	0.4991	0.8561	1	0.5539
9	rs951745	102298666	C	0.2899	0.2072	A	9.677	0.001866	1.563	0.1446	1.177	2.075	1	0.5539
3	rs3996189	105576911	G	0.3067	0.2219	A	9.675	0.001867	1.551	0.1423	1.174	2.05	1	0.5539
6	rs4440495	107906652	A	0.09244	0.1683	G	9.673	0.00187	0.5032	0.2251	0.3237	0.7822	1	0.5539
4	rs3816587	25417244	C	0.2941	0.3934	T	9.66	0.001883	0.6424	0.1435	0.485	0.8511	1	0.5568
2	rs11692573	154318295	C	0.3403	0.2519	A	9.656	0.001887	1.533	0.1384	1.168	2.01	1	0.557
19	rs17261710	8136398	C	0.2689	0.189	T	9.65	0.001894	1.578	0.148	1.18	2.109	1	0.558
2	rs763694	59213427	A	0.2065	0.3133	G	9.636	0.001908	0.5704	0.1832	0.3984	0.8168	1	0.5607
11	rs151327191	94731822	G	0.03361	0.01153	C	9.634	0.00191	2.981	0.3696	1.445	6.152	1	0.5607
16	rs77379438	4625470	G	0.06723	0.0314	C	9.631	0.001914	2.223	0.2642	1.325	3.732	1	0.5608
2	rs6722390	70176616	G	0.1765	0.1121	A	9.621	0.001923	1.697	0.1725	1.21	2.38	1	0.5624
11	rs201837436	1273659	A	0.0	0.03887	G	9.616	0.001929	0.0	inf	0.0	nan	1	0.5624
6	rs3130663	30666594	G	0.02119	0.005579	A	9.615	0.00193	3.858	0.4691	1.539	9.676	1	0.5624
1	rs2185080	203747752	A	0.2269	0.3215	G	9.612	0.001933	0.6193	0.156	0.4562	0.8407	1	0.5624
1	rs41306185	119925645	A	0.008475	0.001154	T	9.607	0.001939	7.4	0.7588	1.672	32.75	1	0.5631
6	rs1054973	89805888	T	0.1891	0.1223	C	9.597	0.001949	1.673	0.1678	1.204	2.324	1	0.5652
3	rs6766579	184465325	T	0.1681	0.2564	C	9.592	0.001955	0.5859	0.1746	0.4161	0.825	1	0.5657
2	rs1822881	146044052	G	0.4664	0.3685	A	9.581	0.001966	1.498	0.1313	1.158	1.937	1	0.5676
12	rs857750	114996860	A	0.1681	0.2563	G	9.576	0.001972	0.5862	0.1746	0.4163	0.8254	1	0.5676
8	rs750895	15035322	C	0.3529	0.4537	T	9.57	0.001978	0.6568	0.1369	0.5022	0.8588	1	0.5676
17	rs8079273	7597478	A	0.04622	0.01854	G	9.562	0.001986	2.566	0.316	1.381	4.766	1	0.5676
10	rs10999169	71931012	T	0.5168	0.417	C	9.556	0.001993	1.495	0.131	1.157	1.933	1	0.5676
1	rs201364985	120384068	T	0.0	0.03861	C	9.544	0.002006	0.0	inf	0.0	nan	1	0.5676
16	rs4402556	58348328	G	0.2669	0.1874	A	9.541	0.00201	1.579	0.149	1.179	2.114	1	0.5676
3	rs4234688	61474575	T	0.1933	0.1259	C	9.536	0.002015	1.663	0.1664	1.2	2.304	1	0.5676
19	rs200927578	51052082	T	0.0	0.04055	C	9.531	0.002021	0.0	inf	0.0	nan	1	0.5676
4	rs10517073	25417371	G	0.2941	0.3927	A	9.526	0.002026	0.6444	0.1435	0.4864	0.8536	1	0.5676
13	rs9599667	71017463	A	0.1218	0.2031	G	9.521	0.002031	0.5446	0.1999	0.368	0.8058	1	0.5676
2	rs114010802	20974586	T	0.01681	0.003871	C	9.518	0.002034	4.398	0.525	1.572	12.31	1	0.5676
4	rs315675	25363901	T	0.05462	0.1199	A	9.516	0.002037	0.424	0.2866	0.2418	0.7436	1	0.5676
6	rs4709142	167407584	G	0.04202	0.1035	A	9.508	0.002045	0.38	0.3259	0.2006	0.7198	1	0.5676
3	rs35409692	130889683	A	0.008403	0.001153	G	9.507	0.002047	7.341	0.7588	1.659	32.48	1	0.5676
7	rs150696747	27140670	A	0.008403	0.001153	G	9.507	0.002047	7.341	0.7588	1.659	32.48	1	0.5676
12	rs138312988	123703037	C	0.008403	0.001153	T	9.507	0.002047	7.341	0.7588	1.659	32.48	1	0.5676
15	rs33929465	28263554	A	0.008403	0.001153	G	9.507	0.002047	7.341	0.7588	1.659	32.48	1	0.5676
16	rs145470784	2100485	A	0.008403	0.001153	G	9.507	0.002047	7.341	0.7588	1.659	32.48	1	0.5676
19	rs149200523	10220614	A	0.008403	0.001153	G	9.507	0.002047	7.341	0.7588	1.659	32.48	1	0.5676
19	rs200350280	56701429	A	0.008403	0.001153	G	9.507	0.002047	7.341	0.7588	1.659	32.48	1	0.5676
8	rs201036684	145999168	G	0.008403	0.001153	T	9.505	0.00205	7.34	0.7588	1.659	32.48	1	0.5676
6	rs118147866	129601231	T	0.008403	0.001153	C	9.502	0.002052	7.339	0.7588	1.659	32.47	1	0.5676
11	rs17728641	110225438	C	0.1345	0.2175	T	9.502	0.002052	0.559	0.1913	0.3842	0.8132	1	0.5676
20	rs141195716	61485507	T	0.008403	0.001153	C	9.502	0.002052	7.339	0.7588	1.659	32.47	1	0.5676
5	rs1963858	115789599	A	0.3571	0.4576	G	9.494	0.002061	0.6585	0.1365	0.504	0.8606	1	0.5676
5	rs2561598	11641039	G	0.2373	0.3326	A	9.494	0.002062	0.6244	0.1542	0.4615	0.8447	1	0.5676
3	rs6776423	88532530	A	0.3319	0.4318	G	9.493	0.002063	0.6539	0.1389	0.4981	0.8584	1	0.5676
9	rs1411363	102296414	A	0.2899	0.2079	G	9.489	0.002067	1.556	0.1446	1.172	2.066	1	0.5676
4	rs61757197	76955947	A	0.008403	0.001155	T	9.488	0.002068	7.331	0.7588	1.657	32.43	1	0.5676
6	rs2756381	89360837	C	0.008403	0.001155	A	9.488	0.002068	7.331	0.7588	1.657	32.43	1	0.5676
3	rs140886939	63996606	T	0.008403	0.001155	C	9.48	0.002077	7.326	0.7588	1.656	32.41	1	0.5687
21	rs7283136	27444110	C	0.1387	0.0828	T	9.478	0.002079	1.783	0.1904	1.228	2.59	1	0.5687
10	rs4933162	91584351	T	0.02101	0.005593	G	9.455	0.002106	3.815	0.4685	1.523	9.557	1	0.5738
5	rs75207818	141233971	A	0.01261	0.002388	G	9.451	0.002111	5.332	0.61	1.613	17.63	1	0.5738
6	rs16900061	69273529	C	0.2395	0.1646	T	9.447	0.002115	1.598	0.1539	1.182	2.16	1	0.5738
6	rs728831	50987682	T	0.1597	0.2461	C	9.446	0.002116	0.582	0.1782	0.4104	0.8253	1	0.5738
10	rs149516779	86012747	T	0.01261	0.002389	G	9.446	0.002116	5.33	0.61	1.612	17.62	1	0.5738
1	rs12145344	90612804	C	0.3571	0.2679	T	9.444	0.002119	1.518	0.1368	1.161	1.985	1	0.5738
1	rs2788407	112761639	G	0.1555	0.2413	A	9.441	0.002122	0.5788	0.1801	0.4066	0.8238	1	0.5738
2	rs729108	22776833	A	0.5294	0.4298	C	9.435	0.002129	1.492	0.1312	1.154	1.93	1	0.5746
12	rs1476910	9020912	A	0.1176	0.1974	G	9.432	0.002132	0.542	0.2025	0.3645	0.806	1	0.5746
21	rs4920107	43882553	A	0.5168	0.4177	G	9.412	0.002155	1.491	0.131	1.153	1.927	1	0.5783
10	rs11597734	45053522	A	0.1723	0.2602	G	9.41	0.002158	0.5918	0.1729	0.4217	0.8305	1	0.5783
9	rs7020239	8595338	G	0.2479	0.1719	A	9.408	0.00216	1.588	0.152	1.179	2.139	1	0.5783
13	rs797224	33746750	A	0.2629	0.3604	G	9.408	0.00216	0.633	0.1503	0.4715	0.8499	1	0.5783
11	rs201509772	95826052	A	0.008403	0.001162	C	9.406	0.002163	7.282	0.7588	1.646	32.22	1	0.5783
6	rs6938042	93833436	G	0.458	0.3615	T	9.396	0.002175	1.493	0.1315	1.153	1.931	1	0.5794
18	rs3826616	61654463	A	0.542	0.4423	G	9.396	0.002175	1.492	0.1314	1.153	1.93	1	0.5794
5	rs269783	139515394	G	0.2731	0.1936	A	9.39	0.002182	1.565	0.1473	1.172	2.088	1	0.5802
9	rs1326899	113674967	G	0.4496	0.3536	A	9.388	0.002185	1.493	0.1317	1.154	1.933	1	0.5802
6	rs7773313	17386895	T	0.2585	0.1808	C	9.383	0.00219	1.58	0.1505	1.176	2.122	1	0.5805
9	rs12002100	6867766	C	0.1795	0.2689	T	9.379	0.002195	0.5946	0.1716	0.4248	0.8324	1	0.5805
13	rs735539	21280034	A	0.3277	0.2417	G	9.378	0.002196	1.529	0.1397	1.163	2.011	1	0.5805
17	rs61753103	5289554	C	0.02941	0.009554	T	9.358	0.00222	3.142	0.3948	1.449	6.811	1	0.5859
18	rs8091293	71011735	A	0.3277	0.2418	G	9.347	0.002233	1.528	0.1397	1.162	2.01	1	0.5873
13	rs1782795	40982876	T	0.03361	0.01171	C	9.347	0.002234	2.936	0.3694	1.423	6.056	1	0.5873
11	rs7937533	12336668	A	0.2731	0.1938	G	9.34	0.002242	1.563	0.1473	1.171	2.086	1	0.5873
6	rs74690822	11105314	T	0.0	0.03779	C	9.333	0.002251	0.0	inf	0.0	nan	1	0.5873
5	rs2338833	169512063	A	0.2773	0.1975	G	9.328	0.002257	1.559	0.1466	1.17	2.078	1	0.5873
14	rs17100839	63668645	C	0.178	0.1139	T	9.327	0.002258	1.684	0.1726	1.201	2.362	1	0.5873
5	rs116689702	140580692	G	0.01695	0.003959	C	9.324	0.002262	4.338	0.5246	1.551	12.13	1	0.5873
10	rs11257006	11223837	C	0.2563	0.1794	T	9.324	0.002262	1.577	0.1503	1.174	2.117	1	0.5873
5	rs34971	115795188	G	0.2437	0.3381	T	9.322	0.002264	0.6308	0.1522	0.4681	0.85	1	0.5873
7	rs7782650	150869437	C	0.3697	0.2799	T	9.322	0.002264	1.51	0.1358	1.157	1.97	1	0.5873
1	rs2820304	201918527	G	0.563	0.4634	T	9.321	0.002265	1.492	0.1319	1.152	1.933	1	0.5873
20	rs2424171	18328816	T	0.1218	0.2018	C	9.309	0.00228	0.549	0.1994	0.3713	0.8115	1	0.5903
5	rs3924079	117843869	A	0.3025	0.2197	G	9.304	0.002287	1.541	0.1428	1.165	2.039	1	0.591
12	rs12228854	48396920	T	0.07983	0.151	G	9.301	0.00229	0.4876	0.2405	0.3043	0.7813	1	0.591
13	rs1590987	104279976	G	0.09314	0.1746	A	9.297	0.002295	0.4854	0.2421	0.302	0.7802	1	0.5914
2	rs4667046	186434458	T	0.08491	0.1626	C	9.292	0.002302	0.4779	0.2477	0.2941	0.7765	1	0.5914
8	rs2028774	34249110	A	0.1555	0.2405	G	9.29	0.002305	0.5812	0.1801	0.4083	0.8274	1	0.5914
2	rs10496915	142882593	C	0.07143	0.1404	A	9.284	0.002312	0.4708	0.253	0.2867	0.7731	1	0.5914
2	rs883045	219941586	G	0.2227	0.3152	A	9.283	0.002313	0.6224	0.157	0.4575	0.8467	1	0.5914
1	rs560517	194902278	T	0.5588	0.4594	C	9.281	0.002315	1.49	0.1318	1.151	1.93	1	0.5914
21	rs7276116	18318167	A	0.1134	0.06425	C	9.269	0.00233	1.864	0.2077	1.24	2.8	1	0.5914
5	rs729987	153671061	G	0.4706	0.3741	A	9.268	0.002332	1.487	0.1312	1.15	1.924	1	0.5914
1	rs2196887	112727458	T	0.1555	0.2404	G	9.266	0.002334	0.5816	0.1801	0.4086	0.8279	1	0.5914
5	rs1898910	124555847	A	0.2773	0.1977	C	9.266	0.002334	1.557	0.1466	1.168	2.075	1	0.5914
5	rs256821	155926544	G	0.479	0.3821	A	9.265	0.002336	1.487	0.1311	1.15	1.922	1	0.5914
1	rs814318	110788825	T	0.1218	0.2015	C	9.263	0.002338	0.5498	0.1994	0.3719	0.8127	1	0.5914
11	rs1944662	81657804	T	0.1765	0.1131	C	9.263	0.002338	1.681	0.1724	1.199	2.356	1	0.5914
15	rs4306453	95462135	T	0.1765	0.2641	C	9.258	0.002345	0.5971	0.1713	0.4269	0.8353	1	0.5918
7	rs10278912	123037887	T	0.2331	0.1596	C	9.251	0.002353	1.6	0.156	1.179	2.172	1	0.5918
2	rs17027173	103057043	A	0.2689	0.1905	G	9.251	0.002354	1.563	0.148	1.169	2.089	1	0.5918
10	rs11194892	111610382	T	0.1597	0.2451	C	9.251	0.002354	0.5852	0.1782	0.4127	0.8298	1	0.5918
5	rs2561481	102694112	G	0.2815	0.3779	A	9.24	0.002368	0.645	0.1453	0.4852	0.8576	1	0.5938
1	rs112466731	167825449	C	0.05462	0.02388	T	9.237	0.002372	2.361	0.2914	1.334	4.18	1	0.5938
8	rs2319924	97772970	G	0.5	0.402	A	9.236	0.002373	1.488	0.1315	1.15	1.925	1	0.5938
2	rs13023094	27910706	C	0.2857	0.2052	A	9.233	0.002377	1.55	0.1452	1.166	2.06	1	0.5938
16	rs1046502	2035868	T	0.2521	0.1761	C	9.229	0.002382	1.577	0.1512	1.173	2.121	1	0.5941
12	rs11179538	73476395	G	0.1597	0.245	T	9.227	0.002385	0.5856	0.1782	0.4129	0.8304	1	0.5941
22	rs9622418	36969683	G	0.3193	0.2349	T	9.219	0.002395	1.528	0.1407	1.16	2.013	1	0.5951
3	rs7637969	190982476	C	0.3193	0.2349	T	9.218	0.002397	1.528	0.1407	1.16	2.013	1	0.5951
4	rs17062227	176828539	A	0.02941	0.009639	G	9.2	0.00242	3.113	0.3947	1.436	6.749	1	0.5996
7	rs17145184	67641115	C	0.1639	0.1032	T	9.192	0.00243	1.703	0.1776	1.202	2.412	1	0.5996
10	rs7916855	124122430	T	0.4414	0.3438	C	9.192	0.002431	1.508	0.1365	1.154	1.971	1	0.5996
20	rs6063219	46787514	G	0.3644	0.2751	T	9.188	0.002436	1.51	0.137	1.155	1.976	1	0.5996
5	rs1438692	148659664	A	0.4412	0.3466	G	9.187	0.002437	1.488	0.1319	1.149	1.927	1	0.5996
3	rs2639242	81019528	T	0.1471	0.09	C	9.18	0.002446	1.743	0.1858	1.211	2.509	1	0.5996
12	rs10842954	27775904	A	0.4034	0.3114	G	9.178	0.002449	1.495	0.1336	1.151	1.942	1	0.5996
7	rs608447	123395983	A	0.5252	0.4271	G	9.175	0.002454	1.484	0.1311	1.148	1.919	1	0.5996
12	rs560906	10122204	A	0.2143	0.3055	G	9.175	0.002454	0.6201	0.1592	0.4539	0.8472	1	0.5996
3	rs9821069	147237708	G	0.2899	0.2091	A	9.173	0.002456	1.544	0.1446	1.163	2.05	1	0.5996
7	rs12375125	47382518	A	0.5924	0.4933	G	9.172	0.002457	1.493	0.1332	1.15	1.938	1	0.5996
6	rs654694	150670899	C	0.2731	0.1944	T	9.171	0.002458	1.557	0.1473	1.166	2.078	1	0.5996
4	rs6849123	91465511	T	0.09746	0.1729	C	9.166	0.002466	0.5166	0.222	0.3344	0.7982	1	0.6005
3	rs9822201	189032004	G	0.3739	0.4728	A	9.158	0.002477	0.666	0.1352	0.511	0.8681	1	0.6018
1	rs28652778	19194995	T	0.1017	0.1774	C	9.157	0.002478	0.5248	0.2167	0.3432	0.8025	1	0.6018
1	rs16826069	39797055	G	0.3025	0.2203	A	9.149	0.002488	1.535	0.1428	1.161	2.031	1	0.6031
2	rs3863911	154278240	T	0.1695	0.2561	C	9.147	0.002491	0.5929	0.1747	0.421	0.8351	1	0.6031
12	rs78804313	55846794	A	0.01271	0.002471	T	9.131	0.002512	5.198	0.6091	1.575	17.15	1	0.6065
17	rs199775670	17719848	A	0.01681	0.003977	G	9.132	0.002512	4.281	0.5246	1.531	11.97	1	0.6065
3	rs6777144	137367809	C	0.3739	0.4727	T	9.128	0.002517	0.6664	0.1352	0.5113	0.8686	1	0.6067
19	rs2336457	20500515	C	0.2437	0.1691	T	9.122	0.002526	1.584	0.1535	1.172	2.14	1	0.608
6	rs13202332	107466630	T	0.2368	0.3317	G	9.116	0.002534	0.6252	0.157	0.4596	0.8504	1	0.6086
7	rs6950364	113148087	G	0.0	0.04015	A	9.112	0.002539	0.0	inf	0.0	nan	1	0.6086
11	rs138087778	125887165	A	0.0	0.03722	G	9.112	0.002539	0.0	inf	0.0	nan	1	0.6086
1	rs12751587	96159819	A	0.5294	0.4315	G	9.104	0.002551	1.482	0.1312	1.146	1.916	1	0.6103
7	rs2286831	123303477	G	0.5252	0.4275	A	9.1	0.002556	1.482	0.1311	1.146	1.916	1	0.6103
14	rs7148434	95477759	G	0.04622	0.01894	A	9.097	0.00256	2.51	0.3159	1.351	4.662	1	0.6103
9	rs2381968	9150790	G	0.2311	0.1587	T	9.096	0.002562	1.593	0.1558	1.174	2.162	1	0.6103
1	rs4147857	94474328	C	0.2857	0.2057	T	9.088	0.002573	1.544	0.1452	1.162	2.053	1	0.6114
18	rs10853572	46381949	T	0.5714	0.4729	C	9.085	0.002577	1.486	0.1322	1.147	1.926	1	0.6114
3	rs13077437	24482318	A	0.3739	0.2848	G	9.084	0.002579	1.5	0.1355	1.15	1.957	1	0.6114
19	rs2228539	6926378	C	0.1975	0.2865	T	9.082	0.002581	0.6128	0.1641	0.4443	0.8452	1	0.6114
1	rs7517868	224251666	G	0.5462	0.4481	A	9.077	0.002588	1.482	0.1315	1.146	1.918	1	0.6122
4	rs580602	1993985	A	0.1933	0.2818	G	9.062	0.002609	0.6105	0.1655	0.4413	0.8444	1	0.6134
3	rs56183666	97677974	A	0.02521	0.007661	G	9.061	0.002611	3.35	0.4264	1.452	7.727	1	0.6134
7	rs10214949	79048593	G	0.05462	0.1179	A	9.061	0.002612	0.4324	0.2866	0.2466	0.7584	1	0.6134
10	rs10786907	83908249	G	0.07983	0.0406	T	9.057	0.002617	2.05	0.2437	1.272	3.305	1	0.6134
4	rs16880558	28378505	C	0.05882	0.02671	T	9.056	0.002619	2.277	0.2812	1.312	3.952	1	0.6134
5	rs17167693	134258183	G	0.02941	0.00972	A	9.055	0.00262	3.087	0.3946	1.424	6.691	1	0.6134
10	rs6482497	25866387	C	0.2773	0.3724	T	9.054	0.002622	0.6466	0.146	0.4857	0.8608	1	0.6134
14	rs365990	23861811	G	0.4454	0.3513	A	9.053	0.002623	1.483	0.1318	1.145	1.92	1	0.6134
5	rs35671301	102490411	G	0.03782	0.01418	T	9.049	0.002628	2.733	0.3484	1.381	5.41	1	0.6138
17	rs9895708	61346707	G	0.1849	0.2723	A	9.043	0.002637	0.606	0.1682	0.4358	0.8427	1	0.6145
17	rs2654725	9614556	G	0.3403	0.2544	A	9.038	0.002644	1.512	0.1384	1.153	1.983	1	0.6145
7	rs2286450	149983201	G	0.09664	0.1715	A	9.035	0.002649	0.5168	0.2233	0.3336	0.8007	1	0.6145
2	rs7589885	180651001	C	0.479	0.3833	T	9.034	0.00265	1.479	0.1311	1.144	1.913	1	0.6145
5	rs35952	53592163	C	0.07563	0.1445	T	9.034	0.002651	0.4842	0.2465	0.2987	0.785	1	0.6145
1	rs116879071	186275857	A	0.01261	0.002471	G	9.018	0.002674	5.154	0.6091	1.562	17.01	1	0.6145
4	rs142221362	148560197	A	0.01261	0.002471	G	9.018	0.002674	5.154	0.6091	1.562	17.01	1	0.6145
9	rs10122194	128913654	T	0.01261	0.002471	C	9.018	0.002674	5.154	0.6091	1.562	17.01	1	0.6145
19	rs5447	49481243	C	0.01261	0.002471	T	9.016	0.002677	5.153	0.6091	1.562	17.0	1	0.6145
8	rs268365	15040697	A	0.1849	0.2722	C	9.014	0.00268	0.6065	0.1682	0.4362	0.8434	1	0.6145
3	rs1163391	108982704	T	0.1345	0.215	C	9.012	0.002683	0.5673	0.1913	0.3899	0.8254	1	0.6145
20	rs147679615	34832709	A	0.01261	0.002472	G	9.011	0.002683	5.151	0.6091	1.561	17.0	1	0.6145
12	rs34347775	69085797	A	0.01261	0.002473	G	9.007	0.00269	5.15	0.6091	1.561	16.99	1	0.6145
18	rs11152086	56240030	T	0.1092	0.1853	C	9.006	0.002692	0.5391	0.2091	0.3578	0.8122	1	0.6145
14	rs4144665	66536636	A	0.4454	0.3515	G	9.002	0.002696	1.482	0.1318	1.144	1.918	1	0.6145
6	rs62620225	28117331	T	0.07143	0.035	C	8.996	0.002705	2.121	0.2565	1.283	3.506	1	0.6145
7	rs668373	105373099	T	0.479	0.3835	C	8.994	0.002709	1.478	0.1311	1.143	1.911	1	0.6145
5	rs199849689	140790021	T	0.02101	0.005771	C	8.992	0.002712	3.697	0.4676	1.479	9.245	1	0.6145
2	rs7595739	27874563	G	0.5466	0.4486	T	8.991	0.002713	1.482	0.132	1.144	1.92	1	0.6145
1	rs10881518	108857903	T	0.3067	0.4029	C	8.989	0.002717	0.6557	0.1418	0.4966	0.8657	1	0.6145
4	rs10005483	164384209	A	0.3235	0.2396	G	8.987	0.002719	1.518	0.1402	1.153	1.998	1	0.6145
7	rs41277425	143085968	T	0.04622	0.01904	C	8.985	0.002721	2.496	0.3158	1.344	4.635	1	0.6145
11	rs4130016	133398116	G	0.09664	0.1701	A	8.983	0.002726	0.5219	0.2207	0.3386	0.8044	1	0.6145
10	rs11188831	98328512	A	0.07143	0.139	G	8.982	0.002727	0.4764	0.2531	0.2901	0.7822	1	0.6145
5	rs10515805	159365567	A	0.2353	0.1627	G	8.98	0.002729	1.584	0.1548	1.169	2.145	1	0.6145
8	rs16929812	63817743	G	0.1261	0.0743	A	8.979	0.002732	1.797	0.1983	1.218	2.651	1	0.6145
3	rs17685501	4468080	T	0.4874	0.3916	C	8.976	0.002735	1.477	0.131	1.143	1.91	1	0.6145
6	rs1247320	161333781	C	0.08051	0.1507	T	8.975	0.002736	0.4935	0.2406	0.3079	0.7908	1	0.6145
3	rs11717257	1053653	G	0.09664	0.17	A	8.968	0.002748	0.5222	0.2207	0.3388	0.8048	1	0.6148
17	rs17180903	70039846	A	0.3517	0.2647	G	8.968	0.002748	1.507	0.1379	1.15	1.975	1	0.6148
4	rs918402	181691738	C	0.08824	0.1598	A	8.967	0.002749	0.5088	0.2299	0.3243	0.7984	1	0.6148
10	rs10761678	64673225	G	0.4237	0.3311	A	8.954	0.002769	1.486	0.1331	1.145	1.929	1	0.6178
8	rs1994950	15237056	C	0.09829	0.1727	A	8.953	0.00277	0.5222	0.2209	0.3387	0.8051	1	0.6178
1	rs9442193	16367339	A	0.3276	0.4256	G	8.949	0.002776	0.6576	0.1411	0.4987	0.8671	1	0.6183
8	rs1350059	63848556	G	0.3866	0.4843	A	8.941	0.002789	0.6709	0.1343	0.5156	0.8729	1	0.6183
7	rs7804288	66765880	T	0.07627	0.1452	C	8.939	0.002792	0.4859	0.2466	0.2997	0.7879	1	0.6183
5	rs3849781	39500920	C	0.1975	0.2857	T	8.936	0.002796	0.6151	0.1641	0.446	0.8485	1	0.6183
19	rs1054486	12774208	C	0.4244	0.3321	G	8.936	0.002796	1.483	0.1326	1.143	1.923	1	0.6183
17	rs8073156	77434466	G	0.08824	0.1596	A	8.932	0.002801	0.5095	0.2299	0.3247	0.7994	1	0.6183
1	rs79478039	169698442	T	0.01681	0.004036	G	8.931	0.002803	4.219	0.5242	1.51	11.79	1	0.6183
4	rs3822286	110925459	A	0.01681	0.004036	G	8.931	0.002803	4.219	0.5242	1.51	11.79	1	0.6183
3	rs200463650	41759262	A	0.01681	0.004036	G	8.929	0.002807	4.218	0.5242	1.51	11.78	1	0.6183
2	rs11692518	170306991	T	0.395	0.4927	G	8.927	0.00281	0.6721	0.1338	0.517	0.8736	1	0.6183
14	rs8004644	54271211	C	0.01681	0.004038	T	8.922	0.002818	4.216	0.5242	1.509	11.78	1	0.6193
16	rs891160	18046387	T	0.2689	0.3627	C	8.911	0.002835	0.6462	0.1474	0.484	0.8626	1	0.6222
21	rs13050921	26023271	C	0.1008	0.1748	T	8.908	0.002839	0.5295	0.2166	0.3463	0.8095	1	0.6224
7	rs10241304	76414540	C	0.2773	0.1991	T	8.901	0.00285	1.544	0.1466	1.158	2.057	1	0.6238
10	rs3824654	12826886	A	0.3445	0.2589	G	8.896	0.002858	1.505	0.138	1.148	1.972	1	0.6247
2	rs4971371	1076684	C	0.437	0.3442	T	8.884	0.002877	1.479	0.1321	1.142	1.916	1	0.6266
12	rs4964840	129683938	C	0.437	0.3442	T	8.884	0.002877	1.479	0.1321	1.142	1.916	1	0.6266
8	rs1901090	133497127	A	0.3992	0.3089	G	8.881	0.002881	1.486	0.1338	1.143	1.932	1	0.6266
17	rs2072081	42327493	T	0.4202	0.3284	G	8.881	0.002882	1.482	0.1327	1.142	1.922	1	0.6266
6	rs1537834	94500169	T	0.3739	0.2857	G	8.879	0.002885	1.494	0.1355	1.145	1.948	1	0.6266
1	rs1533184	42238233	G	0.5084	0.4124	A	8.875	0.002891	1.474	0.131	1.14	1.905	1	0.6271
3	rs4677179	72571732	A	0.2521	0.1774	G	8.861	0.002913	1.563	0.1512	1.162	2.102	1	0.6298
5	rs1388579	21170524	T	0.5378	0.4411	C	8.857	0.00292	1.475	0.1313	1.14	1.907	1	0.6298
7	rs9642178	83814352	C	0.1261	0.07458	T	8.85	0.002931	1.79	0.1983	1.213	2.64	1	0.6298
3	rs12496761	158633726	T	0.1639	0.2477	C	8.849	0.002933	0.5951	0.1764	0.4212	0.8409	1	0.6298
3	rs4546169	87816137	A	0.1008	0.1745	G	8.847	0.002935	0.5306	0.2166	0.347	0.8112	1	0.6298
17	rs3744758	43195663	G	0.02941	0.009836	A	8.847	0.002936	3.05	0.3946	1.408	6.61	1	0.6298
7	rs10487806	123314446	C	0.5252	0.4288	T	8.845	0.002938	1.473	0.1311	1.14	1.905	1	0.6298
6	rs667875	6019942	G	0.563	0.4659	A	8.844	0.002941	1.477	0.1319	1.14	1.913	1	0.6298
16	rs8057436	3613239	T	0.0	0.03642	C	8.836	0.002953	0.0	inf	0.0	nan	1	0.6298
1	rs7536659	151816718	C	0.416	0.3247	T	8.835	0.002955	1.481	0.1329	1.141	1.922	1	0.6298
17	rs151138158	29552243	A	0.0	0.03613	G	8.833	0.002958	0.0	inf	0.0	nan	1	0.6298
9	rs4741389	14517555	C	0.1176	0.06828	T	8.831	0.002962	1.82	0.2044	1.219	2.716	1	0.6298
20	rs2076690	8696722	T	0.2521	0.1775	C	8.831	0.002962	1.562	0.1512	1.161	2.1	1	0.6298
14	rs7145372	104359121	T	0.3992	0.3091	C	8.829	0.002965	1.485	0.1338	1.142	1.93	1	0.6298
7	rs2177553	31299814	A	0.3655	0.2782	G	8.827	0.002968	1.495	0.1361	1.145	1.952	1	0.6298
8	rs4515577	115934365	G	0.07627	0.03841	A	8.825	0.002972	2.067	0.2497	1.267	3.372	1	0.6298
6	rs9405852	5587708	G	0.1	0.1813	A	8.813	0.002991	0.5017	0.2369	0.3154	0.7982	1	0.6298
2	rs56307213	179431076	G	0.05508	0.02455	C	8.812	0.002992	2.317	0.2913	1.309	4.1	1	0.6298
1	rs187947581	5935064	C	0.01261	0.00251	T	8.808	0.002999	5.073	0.6091	1.537	16.74	1	0.6298
1	rs11210834	43787437	G	0.1849	0.2711	A	8.801	0.00301	0.6099	0.1683	0.4385	0.8482	1	0.6298
17	rs2318104	3598018	T	0.2563	0.1813	C	8.796	0.003019	1.556	0.1503	1.159	2.09	1	0.6298
20	rs6022671	52310039	T	0.3093	0.2274	C	8.793	0.003023	1.521	0.1425	1.151	2.011	1	0.6298
10	rs7079524	73069492	G	0.07143	0.1381	A	8.789	0.00303	0.48	0.2531	0.2923	0.7883	1	0.6298
1	rs6540916	216069531	T	0.2563	0.3486	C	8.782	0.003042	0.6439	0.1497	0.4802	0.8635	1	0.6298
2	rs11674718	227371725	C	0.3067	0.2255	T	8.781	0.003044	1.52	0.1423	1.15	2.009	1	0.6298
6	rs993200	95320818	C	0.3529	0.4494	A	8.771	0.003061	0.6683	0.1369	0.511	0.8741	1	0.6298
17	rs940853	8927174	G	0.1992	0.287	A	8.767	0.003067	0.6177	0.1642	0.4477	0.8522	1	0.6298
1	rs1999248	160927727	T	0.2773	0.1996	G	8.765	0.003071	1.538	0.1466	1.154	2.05	1	0.6298
1	rs12138691	112736898	A	0.1555	0.2378	G	8.764	0.003072	0.5901	0.1802	0.4146	0.84	1	0.6298
2	rs12474851	188744807	A	0.1891	0.2755	G	8.764	0.003073	0.6132	0.1668	0.4422	0.8503	1	0.6298
22	rs5995169	36219694	G	0.1864	0.1224	T	8.762	0.003075	1.643	0.1694	1.179	2.29	1	0.6298
12	rs11616188	6502742	A	0.3578	0.4554	G	8.761	0.003078	0.6661	0.1382	0.5081	0.8733	1	0.6298
6	rs9344437	85594528	C	0.2941	0.2144	T	8.758	0.003083	1.527	0.144	1.151	2.024	1	0.6298
9	rs1756875	4770942	C	0.563	0.4664	T	8.753	0.003091	1.474	0.1319	1.138	1.909	1	0.6298
3	rs11708067	123065778	G	0.1008	0.174	A	8.749	0.003097	0.5324	0.2166	0.3482	0.8139	1	0.6298
22	rs4820250	37197530	A	0.2521	0.1778	G	8.749	0.003098	1.558	0.1512	1.159	2.096	1	0.6298
12	rs12580969	52211617	C	0.1555	0.09769	A	8.749	0.003099	1.7	0.1815	1.191	2.426	1	0.6298
12	rs148108135	105591553	C	0.008403	0.001235	T	8.746	0.003103	6.851	0.7556	1.558	30.13	1	0.6298
15	rs117001662	101862775	C	0.008403	0.001235	T	8.746	0.003103	6.851	0.7556	1.558	30.13	1	0.6298
16	rs8044329	52460222	A	0.008403	0.001235	G	8.746	0.003103	6.851	0.7556	1.558	30.13	1	0.6298
3	rs112095333	11070958	A	0.008403	0.001236	C	8.744	0.003106	6.85	0.7556	1.558	30.12	1	0.6298
4	rs769240	122744067	C	0.008403	0.001236	A	8.744	0.003106	6.85	0.7556	1.558	30.12	1	0.6298
6	rs146534657	138195991	G	0.008403	0.001236	A	8.744	0.003106	6.85	0.7556	1.558	30.12	1	0.6298
14	rs148360332	77919702	T	0.008403	0.001236	C	8.744	0.003106	6.85	0.7556	1.558	30.12	1	0.6298
19	rs142478131	39234681	A	0.008403	0.001236	G	8.744	0.003106	6.85	0.7556	1.558	30.12	1	0.6298
7	rs61755271	134617996	A	0.008403	0.001236	G	8.742	0.003109	6.849	0.7556	1.558	30.12	1	0.6298
10	rs12572257	6050630	A	0.008403	0.001236	G	8.742	0.003109	6.849	0.7556	1.558	30.12	1	0.6298
15	rs141200145	76523730	G	0.008403	0.001236	T	8.742	0.003109	6.849	0.7556	1.558	30.12	1	0.6298
17	rs8072843	54638948	A	0.008403	0.001236	G	8.742	0.003109	6.849	0.7556	1.558	30.12	1	0.6298
18	rs7240966	46395379	A	0.3025	0.2219	G	8.741	0.003111	1.521	0.1428	1.15	2.012	1	0.6298
7	rs10276303	3318658	T	0.3782	0.2902	C	8.74	0.003113	1.488	0.1352	1.141	1.939	1	0.6298
11	rs199846198	65421892	A	0.008403	0.001236	G	8.74	0.003113	6.848	0.7556	1.557	30.11	1	0.6298
18	rs12456242	75447827	T	0.008403	0.001236	C	8.736	0.003119	6.846	0.7556	1.557	30.1	1	0.6298
11	rs7944535	9383450	T	0.4958	0.4009	C	8.735	0.003121	1.469	0.131	1.137	1.899	1	0.6298
17	rs35682745	72240168	A	0.07273	0.1428	G	8.736	0.003121	0.4707	0.2609	0.2823	0.785	1	0.6298
7	rs1860722	123037157	T	0.2311	0.1599	C	8.735	0.003122	1.579	0.1558	1.163	2.142	1	0.6298
18	rs7505361	14419170	G	0.1387	0.08446	A	8.735	0.003122	1.745	0.1907	1.201	2.536	1	0.6298
18	rs948897	71018589	A	0.2605	0.1851	G	8.731	0.003128	1.551	0.1497	1.157	2.08	1	0.6302
13	rs582385	47445994	G	0.3151	0.2332	A	8.722	0.003145	1.513	0.1412	1.147	1.995	1	0.6319
4	rs12499000	121706201	G	0.2185	0.3075	A	8.719	0.003149	0.6295	0.1581	0.4618	0.8581	1	0.6319
5	rs2932132	163953132	C	0.3571	0.4533	T	8.716	0.003155	0.67	0.1365	0.5127	0.8755	1	0.6319
19	rs7248247	7014437	C	0.09664	0.169	A	8.714	0.003158	0.5261	0.2212	0.341	0.8117	1	0.6319
16	rs200722966	67034867	G	0.008403	0.001239	C	8.713	0.003159	6.832	0.7556	1.554	30.04	1	0.6319
1	rs2252865	8422676	T	0.2311	0.3212	C	8.711	0.003163	0.6352	0.155	0.4688	0.8608	1	0.6319
17	rs967823	50317276	G	0.3193	0.4144	A	8.711	0.003163	0.6629	0.1403	0.5036	0.8726	1	0.6319
8	rs10087833	84758943	G	0.3403	0.4361	T	8.708	0.003169	0.6672	0.138	0.5091	0.8745	1	0.6322
12	rs7301270	92895170	C	0.3571	0.4532	T	8.701	0.00318	0.6702	0.1365	0.5129	0.8758	1	0.6337
1	rs6666372	48765945	A	0.2605	0.3526	G	8.694	0.003193	0.6468	0.1489	0.4831	0.866	1	0.6344
17	rs147072509	80280102	G	0.008403	0.001241	A	8.692	0.003196	6.82	0.7556	1.551	29.99	1	0.6344
10	rs9665552	8811034	T	0.2605	0.3526	C	8.692	0.003197	0.6468	0.1489	0.4831	0.866	1	0.6344
18	rs1566819	26120737	G	0.395	0.3059	T	8.689	0.003202	1.481	0.1341	1.139	1.926	1	0.6344
9	rs10761266	96524226	A	0.1681	0.2516	G	8.688	0.003203	0.6009	0.1746	0.4268	0.8461	1	0.6344
9	rs11243657	135064788	T	0.3151	0.4099	C	8.68	0.003217	0.6624	0.1407	0.5027	0.8728	1	0.6365
6	rs9494797	137829980	T	0.1261	0.07495	C	8.675	0.003225	1.78	0.1985	1.207	2.627	1	0.6373
12	rs3794261	95906603	A	0.03782	0.09368	C	8.67	0.003235	0.3802	0.3413	0.1948	0.7422	1	0.638
1	rs6704399	89222420	G	0.5546	0.4586	A	8.669	0.003236	1.47	0.1317	1.136	1.903	1	0.638
17	rs3744679	3635740	G	0.09664	0.05312	C	8.66	0.003253	1.907	0.2231	1.231	2.953	1	0.6383
1	rs2492604	42253788	A	0.08403	0.04414	C	8.659	0.003255	1.987	0.2378	1.247	3.166	1	0.6383
17	rs9906150	69074779	A	0.1681	0.2514	G	8.658	0.003257	0.6014	0.1746	0.4271	0.8469	1	0.6383
12	rs7134109	18202487	A	0.1807	0.1182	G	8.656	0.003259	1.645	0.1708	1.177	2.299	1	0.6383
21	rs2299743	41240579	C	0.1303	0.2082	T	8.656	0.003259	0.5694	0.1939	0.3894	0.8326	1	0.6383
19	rs116676388	19613284	A	0.01681	0.004118	G	8.654	0.003264	4.134	0.5238	1.481	11.54	1	0.6383
4	rs10213170	127224641	T	0.3529	0.4487	C	8.65	0.003271	0.6703	0.1369	0.5126	0.8766	1	0.6383
5	rs2197422	41345349	G	0.1441	0.2245	T	8.647	0.003277	0.5814	0.1866	0.4033	0.8382	1	0.6383
6	rs3777958	117633847	T	0.3613	0.2752	C	8.643	0.003284	1.49	0.1365	1.14	1.947	1	0.6383
9	rs56394801	97869507	G	0.0	0.03507	T	8.64	0.00329	0.0	inf	0.0	nan	1	0.6383
12	rs6538888	99343883	A	0.1303	0.2081	G	8.639	0.003291	0.5697	0.1939	0.3896	0.8331	1	0.6383
3	rs9854414	30069870	C	0.3496	0.4476	A	8.636	0.003297	0.6632	0.1407	0.5034	0.8738	1	0.6383
19	rs4646511	15763775	A	0.15	0.2346	G	8.633	0.003301	0.5759	0.1901	0.3968	0.836	1	0.6383
3	rs148619685	46621330	C	0.01271	0.002571	G	8.631	0.003305	4.995	0.6082	1.516	16.46	1	0.6383
14	rs12147538	36876044	A	0.4622	0.3693	C	8.63	0.003307	1.468	0.1314	1.135	1.899	1	0.6383
4	rs7695573	28652911	C	0.1271	0.07562	T	8.629	0.003308	1.78	0.199	1.205	2.629	1	0.6383
16	rs9938341	82582625	T	0.1429	0.2227	C	8.629	0.003309	0.5816	0.1867	0.4034	0.8386	1	0.6383
15	rs768269	39235357	A	0.3403	0.4356	C	8.627	0.003312	0.6684	0.138	0.51	0.8761	1	0.6383
8	rs7837333	67840116	C	0.3193	0.2373	T	8.627	0.003313	1.507	0.1407	1.144	1.986	1	0.6383
2	rs10931765	197797224	T	0.1849	0.2701	C	8.622	0.003321	0.613	0.1683	0.4407	0.8525	1	0.6383
12	rs4554985	24792818	C	0.2381	0.3465	T	8.622	0.003321	0.5893	0.1821	0.4124	0.8421	1	0.6383
6	rs9397956	156971688	G	0.3025	0.2224	A	8.621	0.003324	1.516	0.1428	1.146	2.006	1	0.6383
13	rs12585194	42551568	A	0.2017	0.1356	G	8.616	0.003332	1.61	0.1637	1.168	2.219	1	0.6385
11	rs144525570	540740	A	0.0	0.03526	G	8.616	0.003333	0.0	inf	0.0	nan	1	0.6385
1	rs45549044	215844373	T	0.01261	0.002553	C	8.612	0.00334	4.987	0.6082	1.514	16.43	1	0.6385
3	rs140344625	8923102	T	0.01261	0.002553	C	8.612	0.00334	4.987	0.6082	1.514	16.43	1	0.6385
6	rs149339643	31557696	T	0.01261	0.002554	C	8.607	0.003348	4.986	0.6082	1.514	16.42	1	0.6388
1	rs1322935	78963305	C	0.3277	0.245	A	8.605	0.003352	1.502	0.1397	1.143	1.976	1	0.6388
7	rs726284	131647414	A	0.1218	0.1982	C	8.604	0.003355	0.5614	0.1995	0.3798	0.83	1	0.6388
11	rs4939097	56652705	G	0.2521	0.1784	A	8.6	0.003362	1.552	0.1512	1.154	2.088	1	0.6388
20	rs12625736	40752568	G	0.2269	0.316	A	8.597	0.003367	0.6353	0.156	0.468	0.8625	1	0.6388
6	rs6932835	89027593	G	0.3233	0.2395	A	8.596	0.003369	1.517	0.1431	1.146	2.009	1	0.6388
17	rs17816912	10625803	C	0.2185	0.1498	T	8.596	0.003369	1.587	0.1589	1.162	2.167	1	0.6388
10	rs7900896	44308000	A	0.2353	0.3251	G	8.593	0.003375	0.6387	0.1542	0.4722	0.864	1	0.6391
6	rs853422	4134031	C	0.07143	0.1371	A	8.586	0.003387	0.4839	0.2531	0.2947	0.7947	1	0.6399
9	rs10819689	102400263	T	0.2689	0.193	C	8.585	0.003389	1.538	0.148	1.151	2.056	1	0.6399
5	rs55796768	95011189	G	0.05882	0.02726	A	8.584	0.003392	2.23	0.2811	1.286	3.869	1	0.6399
15	rs4439706	47129544	C	0.4118	0.322	T	8.582	0.003394	1.474	0.1331	1.135	1.913	1	0.6399
1	rs365222	83120822	G	0.4034	0.4992	A	8.571	0.003415	0.6783	0.1334	0.5223	0.8809	1	0.6407
8	rs10108289	752709	G	0.4286	0.3378	A	8.569	0.003419	1.47	0.1324	1.134	1.905	1	0.6407
12	rs10847863	129892525	G	0.2059	0.1393	A	8.568	0.003422	1.602	0.1624	1.165	2.203	1	0.6407
2	rs1913995	13204511	C	0.2543	0.1796	T	8.559	0.003438	1.558	0.1527	1.155	2.101	1	0.6407
12	rs17225357	66023581	G	0.04202	0.01694	A	8.559	0.003438	2.545	0.3309	1.331	4.868	1	0.6407
8	rs1992805	142950775	T	0.2815	0.3741	C	8.558	0.003441	0.6556	0.1453	0.4931	0.8717	1	0.6407
13	rs3945431	42272932	G	0.3361	0.4309	A	8.557	0.003441	0.6687	0.1384	0.5098	0.8772	1	0.6407
1	rs12028069	48015566	G	0.3686	0.4645	A	8.557	0.003442	0.6731	0.1361	0.5155	0.879	1	0.6407
20	rs6089240	60152260	A	0.5924	0.4967	G	8.557	0.003442	1.473	0.1332	1.135	1.912	1	0.6407
2	rs12615721	81856526	A	0.1176	0.06886	G	8.556	0.003444	1.803	0.2044	1.208	2.691	1	0.6407
2	rs11686983	181522438	T	0.1975	0.1324	C	8.554	0.003448	1.613	0.165	1.167	2.229	1	0.6407
8	rs62508075	110397780	G	0.08403	0.04432	A	8.554	0.003448	1.978	0.2378	1.241	3.153	1	0.6407
6	rs16879870	87531746	A	0.02521	0.007908	C	8.551	0.003454	3.245	0.426	1.408	7.478	1	0.6407
8	rs2142145	91460670	G	0.2647	0.3563	A	8.55	0.003454	0.6505	0.1481	0.4866	0.8697	1	0.6407
1	rs1322934	78963437	A	0.3277	0.2452	G	8.549	0.003458	1.501	0.1397	1.141	1.973	1	0.6407
10	rs7916337	131605924	C	0.1891	0.2743	T	8.547	0.003461	0.6169	0.1668	0.4449	0.8554	1	0.6407
16	rs8054239	55201013	C	0.5126	0.4182	T	8.544	0.003466	1.463	0.131	1.132	1.892	1	0.641
5	rs1862242	170233262	G	0.2311	0.1606	A	8.539	0.003477	1.571	0.1557	1.157	2.131	1	0.6422
6	rs17592421	12223922	A	0.3403	0.4351	G	8.535	0.003484	0.6699	0.138	0.5111	0.8779	1	0.6427
3	rs1472862	36825139	A	0.2143	0.3019	G	8.528	0.003497	0.6307	0.1592	0.4616	0.8616	1	0.6442
7	rs6962772	99081730	G	0.2227	0.1535	A	8.527	0.003499	1.579	0.1578	1.159	2.152	1	0.6442
2	rs807597	15793904	C	0.2311	0.1607	T	8.523	0.003507	1.57	0.1557	1.157	2.13	1	0.6446
5	rs3111532	179641662	C	0.5672	0.4718	T	8.522	0.003509	1.467	0.1321	1.133	1.901	1	0.6446
15	rs6496557	89680776	T	0.3235	0.4177	C	8.518	0.003516	0.6668	0.1398	0.507	0.8769	1	0.6451
5	rs12659043	97111523	T	0.1303	0.2075	C	8.516	0.00352	0.5719	0.1939	0.3911	0.8363	1	0.6451
11	rs12792768	7708857	A	0.2479	0.1751	G	8.513	0.003527	1.553	0.152	1.153	2.092	1	0.6457
8	rs6995907	9313017	C	0.2059	0.2928	T	8.507	0.003538	0.6262	0.1619	0.4559	0.86	1	0.6469
14	rs7141603	48390003	T	0.2395	0.329	C	8.497	0.003556	0.6422	0.1531	0.4757	0.867	1	0.6496
22	rs490362	27731470	C	0.2296	0.3279	T	8.48	0.00359	0.6108	0.1709	0.4369	0.8539	1	0.655
11	rs12362410	116422860	A	0.3571	0.2722	G	8.471	0.003609	1.485	0.1368	1.136	1.942	1	0.6576
9	rs12684467	32850506	A	0.1134	0.06589	G	8.469	0.003612	1.814	0.2076	1.208	2.725	1	0.6576
2	rs1541725	220638012	T	0.5798	0.4847	C	8.463	0.003625	1.467	0.1326	1.132	1.903	1	0.6587
12	rs17035120	104408794	T	0.08824	0.04745	C	8.46	0.00363	1.943	0.2325	1.232	3.064	1	0.6587
6	rs11155996	154964150	A	0.3649	0.4633	G	8.458	0.003635	0.6654	0.141	0.5048	0.8772	1	0.6587
19	rs3786884	34858801	C	0.07563	0.03863	T	8.458	0.003635	2.036	0.2496	1.248	3.322	1	0.6587
22	rs5755990	36306594	T	0.1849	0.1223	G	8.456	0.003638	1.628	0.1693	1.169	2.269	1	0.6587
6	rs1521242	122323908	C	0.3613	0.2761	T	8.453	0.003644	1.483	0.1365	1.135	1.938	1	0.6591
13	rs9552248	21159200	A	0.2815	0.2046	G	8.437	0.003678	1.523	0.1459	1.144	2.027	1	0.6644
10	rs7093477	118133552	T	0.1471	0.09188	G	8.43	0.003691	1.704	0.1857	1.184	2.452	1	0.666
7	rs705321	98097170	A	0.09664	0.1673	G	8.421	0.00371	0.5325	0.2207	0.3455	0.8207	1	0.6661
3	rs1546733	105409321	C	0.4915	0.3977	T	8.419	0.003713	1.464	0.1321	1.13	1.896	1	0.6661
16	rs13332968	50235912	G	0.07983	0.0416	A	8.417	0.003718	1.999	0.2434	1.24	3.221	1	0.6661
7	rs6980196	26565535	A	0.2857	0.3777	G	8.415	0.003722	0.6591	0.1447	0.4963	0.8752	1	0.6661
19	rs151119204	13216136	C	0.0	0.03416	T	8.411	0.003729	0.0	inf	0.0	nan	1	0.6661
9	rs10977362	8922467	A	0.4496	0.3585	G	8.409	0.003734	1.462	0.1317	1.129	1.892	1	0.6661
11	rs10792820	85703974	C	0.3602	0.2749	A	8.407	0.003737	1.485	0.1372	1.135	1.943	1	0.6661
12	rs10878566	67518301	A	0.04202	0.01709	G	8.4	0.003752	2.523	0.3306	1.319	4.823	1	0.6661
13	rs17790892	66581215	G	0.2773	0.2011	A	8.399	0.003754	1.525	0.1466	1.144	2.032	1	0.6661
2	rs4954557	136805401	T	0.3487	0.4429	C	8.396	0.003761	0.6735	0.1372	0.5147	0.8814	1	0.6661
14	rs2318308	66391099	A	0.3571	0.2725	G	8.396	0.003761	1.483	0.1368	1.134	1.939	1	0.6661
17	rs6505024	54093504	T	0.2269	0.3148	C	8.395	0.003763	0.6387	0.156	0.4704	0.8671	1	0.6661
7	rs10272997	70764516	A	0.1261	0.202	G	8.394	0.003765	0.5699	0.1966	0.3876	0.8378	1	0.6661
11	rs11607730	11601761	C	0.08898	0.1582	T	8.393	0.003767	0.5196	0.23	0.3311	0.8155	1	0.6661
1	rs6701870	7312258	C	0.02521	0.007989	T	8.391	0.003772	3.211	0.4259	1.394	7.4	1	0.6661
10	rs11593253	5790729	T	0.01681	0.0042	C	8.387	0.003779	4.053	0.5234	1.453	11.3	1	0.6661
19	rs144166844	8665906	T	0.01681	0.0042	C	8.387	0.003779	4.053	0.5234	1.453	11.3	1	0.6661
10	rs75514089	5772920	T	0.01681	0.004201	A	8.385	0.003783	4.052	0.5234	1.453	11.3	1	0.6661
11	rs138444298	8642028	A	0.01681	0.004201	G	8.385	0.003783	4.052	0.5234	1.453	11.3	1	0.6661
1	rs754666	230250182	C	0.2815	0.3731	T	8.385	0.003784	0.6584	0.1453	0.4952	0.8754	1	0.6661
15	rs6493462	31404854	C	0.2983	0.3907	T	8.384	0.003785	0.663	0.1429	0.501	0.8773	1	0.6661
2	rs959427	219956012	G	0.2269	0.3148	A	8.383	0.003787	0.6389	0.156	0.4706	0.8673	1	0.6661
3	rs10155005	76986961	C	0.2731	0.3642	A	8.383	0.003788	0.6559	0.1467	0.492	0.8744	1	0.6661
16	rs3743721	66646699	A	0.03361	0.01234	G	8.383	0.003788	2.783	0.369	1.35	5.737	1	0.6661
16	rs144229609	1476244	A	0.0	0.03436	G	8.38	0.003794	0.0	inf	0.0	nan	1	0.6664
14	rs911258	68771450	A	0.1597	0.2404	G	8.378	0.003799	0.6002	0.1782	0.4232	0.8512	1	0.6665
7	rs2082825	48787644	A	0.2	0.287	C	8.372	0.003811	0.6211	0.1661	0.4485	0.8601	1	0.6666
8	rs2843743	37976368	T	0.03361	0.01236	C	8.37	0.003814	2.78	0.3689	1.349	5.729	1	0.6666
4	rs7700147	157167891	C	0.3361	0.2536	T	8.37	0.003815	1.49	0.1388	1.135	1.956	1	0.6666
8	rs11776031	119829141	G	0.1387	0.08544	A	8.368	0.003819	1.723	0.1904	1.187	2.502	1	0.6666
11	rs4757388	16274295	A	0.2521	0.3418	G	8.362	0.003831	0.6492	0.1505	0.4834	0.872	1	0.6666
11	rs489257	79091227	T	0.4916	0.3988	C	8.362	0.003831	1.457	0.131	1.127	1.884	1	0.6666
7	rs145815306	99217536	T	0.0	0.034	C	8.361	0.003833	0.0	inf	0.0	nan	1	0.6666
5	rs11134751	171911313	T	0.1639	0.2451	C	8.361	0.003834	0.6036	0.1764	0.4272	0.8529	1	0.6666
9	rs10761280	96569343	G	0.2017	0.2871	A	8.359	0.003838	0.6272	0.1628	0.4558	0.8629	1	0.6666
4	rs17540321	22757756	G	0.2143	0.3009	A	8.358	0.00384	0.6335	0.1592	0.4637	0.8655	1	0.6666
6	rs12192707	6479161	A	0.4958	0.4025	G	8.354	0.003849	1.459	0.1315	1.128	1.888	1	0.6675
12	rs7965160	116808862	T	0.2076	0.1412	C	8.351	0.003854	1.593	0.1626	1.159	2.191	1	0.6676
3	rs7559	186796053	C	0.1555	0.09876	T	8.348	0.003861	1.68	0.1815	1.177	2.397	1	0.6681
7	rs17779352	17349626	C	0.2059	0.14	T	8.346	0.003866	1.592	0.1624	1.158	2.189	1	0.6683
2	rs3111780	231790097	C	0.2669	0.3578	T	8.342	0.003874	0.6535	0.1484	0.4886	0.874	1	0.6688
2	rs731972	134529356	T	0.3445	0.2613	C	8.34	0.003877	1.486	0.138	1.134	1.947	1	0.6688
3	rs375894534	159995214	T	0.0	0.03504	G	8.338	0.003883	0.0	inf	0.0	nan	1	0.6691
15	rs150727029	76146812	A	0.0	0.0344	C	8.328	0.003903	0.0	inf	0.0	nan	1	0.6717
13	rs9603777	41230062	T	0.07222	0.1493	C	8.327	0.003906	0.4436	0.2894	0.2515	0.7822	1	0.6717
4	rs12508843	119877794	T	0.3866	0.2999	G	8.325	0.00391	1.471	0.1346	1.13	1.915	1	0.6717
19	rs7249536	44938980	A	0.5126	0.4194	G	8.323	0.003916	1.456	0.131	1.126	1.882	1	0.6719
2	rs2241458	1639060	G	0.1404	0.22	A	8.316	0.003929	0.5787	0.192	0.3972	0.8431	1	0.6721
16	rs147045155	4165257	A	0.0	0.03461	C	8.312	0.003938	0.0	inf	0.0	nan	1	0.6721
5	rs28470552	140552585	C	0.03782	0.01474	G	8.309	0.003944	2.627	0.3481	1.328	5.196	1	0.6721
3	rs2643727	65854178	G	0.4328	0.3431	A	8.307	0.003949	1.461	0.1322	1.127	1.893	1	0.6721
5	rs6882638	116180180	T	0.3771	0.2909	C	8.307	0.00395	1.476	0.1358	1.131	1.925	1	0.6721
10	rs666156	105911963	G	0.06696	0.1326	A	8.306	0.003951	0.4694	0.2686	0.2772	0.7947	1	0.6721
18	rs9319712	64378956	C	0.4034	0.3156	T	8.306	0.003951	1.466	0.1336	1.129	1.905	1	0.6721
14	rs17834568	62074238	G	0.1933	0.1297	A	8.305	0.003955	1.608	0.1664	1.161	2.228	1	0.6721
6	rs2056994	146543192	T	0.09244	0.05074	C	8.301	0.003962	1.905	0.2276	1.22	2.977	1	0.6721
12	rs642292	99541061	A	0.2899	0.2126	G	8.301	0.003962	1.512	0.1446	1.139	2.008	1	0.6721
10	rs11252571	4554674	C	0.1891	0.1262	T	8.296	0.003974	1.614	0.1678	1.162	2.243	1	0.6721
5	rs6596197	134431163	A	0.3025	0.2238	C	8.295	0.003976	1.505	0.1428	1.137	1.99	1	0.6721
22	rs2064145	35970554	G	0.5	0.4073	A	8.295	0.003976	1.455	0.131	1.126	1.881	1	0.6721
13	rs9561936	96360079	T	0.5297	0.4358	G	8.294	0.003977	1.458	0.1317	1.126	1.888	1	0.6721
1	rs4390147	23145603	T	0.08898	0.1577	C	8.292	0.003981	0.5216	0.23	0.3323	0.8186	1	0.6721
12	rs1718136	121609608	G	0.5252	0.4318	A	8.292	0.003982	1.456	0.1311	1.126	1.882	1	0.6721
1	rs4926745	49077356	T	0.458	0.3671	C	8.286	0.003994	1.457	0.1315	1.126	1.885	1	0.6728
19	rs147876709	3179310	A	0.0	0.03396	G	8.283	0.004002	0.0	inf	0.0	nan	1	0.6728
17	rs202586	10794640	G	0.2521	0.3413	T	8.281	0.004006	0.6506	0.1505	0.4844	0.8738	1	0.6728
17	rs3744647	8224276	T	0.4832	0.3912	C	8.28	0.004008	1.455	0.131	1.125	1.881	1	0.6728
7	rs7793940	11853008	T	0.2436	0.333	C	8.279	0.00401	0.6451	0.1535	0.4775	0.8716	1	0.6728
7	rs2052095	67620455	T	0.5798	0.4857	C	8.279	0.004011	1.461	0.1326	1.127	1.895	1	0.6728
14	rs12589994	87815467	G	0.563	0.469	A	8.277	0.004015	1.459	0.1319	1.126	1.889	1	0.6728
17	rs35769464	72859001	C	0.02101	0.006047	T	8.275	0.004019	3.527	0.4676	1.411	8.82	1	0.6728
8	rs722989	76441911	A	0.1975	0.1333	G	8.269	0.004032	1.6	0.165	1.158	2.212	1	0.6744
4	rs1121124	70350444	C	0.5672	0.4733	A	8.26	0.004052	1.459	0.1321	1.126	1.89	1	0.6767
22	rs2283657	45910152	G	0.3277	0.4205	A	8.258	0.004058	0.6718	0.1393	0.5113	0.8827	1	0.6767
1	rs212964	48721158	G	0.2689	0.359	A	8.257	0.004059	0.6566	0.1474	0.4919	0.8766	1	0.6767
5	rs16900540	31012808	T	0.2689	0.1943	C	8.255	0.004065	1.525	0.148	1.141	2.039	1	0.6767
5	rs6891726	55889598	G	0.584	0.49	A	8.252	0.00407	1.461	0.1328	1.126	1.895	1	0.6767
20	rs6022677	52311833	A	0.1891	0.1264	G	8.25	0.004076	1.612	0.1678	1.16	2.24	1	0.6767
20	rs237417	5750788	A	0.3571	0.4506	C	8.249	0.004078	0.6772	0.1365	0.5183	0.885	1	0.6767
4	rs11099514	82896862	A	0.5336	0.4403	G	8.248	0.00408	1.455	0.1312	1.125	1.881	1	0.6767
1	rs6660298	240361422	T	0.1949	0.2795	C	8.246	0.004083	0.6242	0.1656	0.4512	0.8635	1	0.6767
7	rs2305358	50512284	T	0.2143	0.3002	C	8.233	0.004114	0.6357	0.1592	0.4653	0.8685	1	0.6783
20	rs6014017	53057466	T	0.1218	0.07278	G	8.231	0.004118	1.768	0.2012	1.192	2.623	1	0.6783
2	rs897477	219941063	G	0.1513	0.2301	A	8.23	0.00412	0.5963	0.1822	0.4172	0.8522	1	0.6783
9	rs7047863	111550862	A	0.01261	0.002635	G	8.23	0.004121	4.831	0.6074	1.469	15.89	1	0.6783
16	rs142391556	67319264	G	0.01261	0.002635	A	8.23	0.004121	4.831	0.6074	1.469	15.89	1	0.6783
22	rs146442722	43614443	G	0.01261	0.002635	A	8.23	0.004121	4.831	0.6074	1.469	15.89	1	0.6783
3	rs13084347	54662474	T	0.07983	0.1459	C	8.227	0.004126	0.5081	0.2405	0.3171	0.8141	1	0.6783
11	rs190036505	47593180	C	0.01261	0.002636	G	8.228	0.004126	4.83	0.6074	1.469	15.88	1	0.6783
1	rs28363218	46726525	T	0.01261	0.002637	C	8.223	0.004135	4.829	0.6074	1.468	15.88	1	0.6785
20	rs144521194	47874052	T	0.02521	0.008075	C	8.223	0.004135	3.177	0.4258	1.379	7.318	1	0.6785
14	rs4898835	54731768	G	0.521	0.4281	A	8.221	0.00414	1.453	0.131	1.124	1.879	1	0.6786
21	rs16998084	42471628	G	0.02941	0.01021	A	8.216	0.004153	2.936	0.3941	1.356	6.358	1	0.6796
4	rs2078040	110779516	G	0.1008	0.05696	A	8.215	0.004155	1.857	0.2193	1.208	2.853	1	0.6796
20	rs16991615	5948227	A	0.09244	0.05091	G	8.211	0.004163	1.899	0.2276	1.216	2.966	1	0.6802
1	rs6693668	42232085	G	0.4286	0.3396	T	8.21	0.004167	1.458	0.1324	1.125	1.89	1	0.6802
3	rs1552037	149823546	C	0.1008	0.1712	T	8.202	0.004185	0.5428	0.2166	0.355	0.8299	1	0.6817
20	rs4810367	41326513	C	0.4034	0.3161	T	8.202	0.004185	1.463	0.1336	1.126	1.901	1	0.6817
2	rs35344714	167262169	C	0.04661	0.1038	T	8.2	0.004188	0.4223	0.3103	0.2299	0.7758	1	0.6817
3	rs6446298	49860854	T	0.4832	0.3916	C	8.198	0.004193	1.452	0.131	1.123	1.878	1	0.6819
19	rs2302524	44156472	C	0.09244	0.1611	T	8.196	0.004198	0.5304	0.2252	0.3412	0.8246	1	0.6819
13	rs17637518	42246277	A	0.2899	0.2129	C	8.194	0.004204	1.51	0.1448	1.137	2.005	1	0.6822
9	rs9409872	136458311	T	0.5	0.4079	G	8.191	0.004209	1.452	0.1309	1.123	1.876	1	0.6824
10	rs3851241	60727887	G	0.3739	0.2889	A	8.188	0.004216	1.47	0.1355	1.127	1.917	1	0.6824
7	rs6961746	49706591	A	0.2941	0.2168	G	8.188	0.004217	1.506	0.144	1.135	1.996	1	0.6824
21	rs2831178	29213323	G	0.4958	0.4039	T	8.185	0.004225	1.452	0.131	1.123	1.876	1	0.6827
13	rs3742321	33704065	C	0.3109	0.2318	T	8.181	0.004234	1.496	0.1417	1.133	1.975	1	0.6827
5	rs3733725	115791669	A	0.09664	0.1661	G	8.177	0.004244	0.5372	0.2207	0.3485	0.828	1	0.6827
6	rs9461680	31243347	T	0.09664	0.1661	C	8.176	0.004244	0.5372	0.2207	0.3485	0.828	1	0.6827
3	rs4679880	159993490	T	0.2034	0.2884	C	8.175	0.004247	0.6299	0.163	0.4577	0.8671	1	0.6827
9	rs10811061	18914103	G	0.1723	0.2535	A	8.173	0.004253	0.6129	0.1729	0.4367	0.8601	1	0.6827
3	rs201948273	196730821	C	0.01261	0.002643	G	8.17	0.004258	4.817	0.6082	1.462	15.87	1	0.6827
5	rs12516671	167861846	A	0.2143	0.1477	G	8.166	0.004268	1.574	0.16	1.15	2.154	1	0.6827
8	rs7827693	29639419	A	0.3729	0.4666	G	8.166	0.004268	0.6798	0.1358	0.5209	0.8872	1	0.6827
2	rs843393	116173796	A	0.1471	0.09261	G	8.152	0.004302	1.689	0.1857	1.174	2.431	1	0.6827
21	rs9974921	18381340	G	0.4244	0.336	A	8.151	0.004305	1.457	0.1326	1.124	1.889	1	0.6827
2	rs11692707	153649490	C	0.1092	0.1809	A	8.145	0.004317	0.5552	0.2091	0.3685	0.8364	1	0.6827
12	rs12311185	107724557	T	0.1597	0.2392	G	8.145	0.004319	0.6044	0.1782	0.4262	0.8571	1	0.6827
1	rs10925416	237602666	T	0.05042	0.1082	C	8.138	0.004335	0.4378	0.2977	0.2443	0.7848	1	0.6827
12	rs3858613	94590052	T	0.1092	0.1809	C	8.133	0.004346	0.5553	0.2092	0.3685	0.8367	1	0.6827
5	rs6872806	41336050	A	0.1471	0.2248	G	8.131	0.004351	0.5946	0.1843	0.4143	0.8533	1	0.6827
7	rs139796765	4002375	A	0.01681	0.004283	G	8.131	0.004352	3.974	0.5231	1.426	11.08	1	0.6827
8	rs202217256	106456600	A	0.01681	0.004283	G	8.131	0.004352	3.974	0.5231	1.426	11.08	1	0.6827
19	rs10413611	48599162	A	0.01681	0.004283	G	8.131	0.004352	3.974	0.5231	1.426	11.08	1	0.6827
17	rs17212215	53934633	G	0.1765	0.1164	A	8.129	0.004357	1.627	0.1724	1.161	2.281	1	0.6827
5	rs17695461	99325303	C	0.05462	0.02512	A	8.119	0.004381	2.243	0.2911	1.268	3.968	1	0.6827
7	rs13234086	93320540	A	0.3445	0.437	C	8.118	0.004383	0.6772	0.1376	0.5171	0.8869	1	0.6827
1	rs9117	19198895	G	0.1303	0.2054	A	8.117	0.004386	0.5794	0.1939	0.3962	0.8473	1	0.6827
4	rs343192	121738049	C	0.2479	0.3359	T	8.117	0.004386	0.6518	0.1513	0.4845	0.8769	1	0.6827
13	rs7989655	54207295	A	0.1345	0.2102	G	8.111	0.0044	0.5836	0.1913	0.4011	0.8491	1	0.6827
1	rs1032524	201790826	T	0.3782	0.4712	C	8.107	0.00441	0.6826	0.1349	0.524	0.8891	1	0.6827
5	rs11167742	140567412	C	0.03846	0.01507	T	8.106	0.004412	2.614	0.3504	1.315	5.195	1	0.6827
5	rs2249160	174555605	C	0.2269	0.3132	T	8.104	0.004418	0.6436	0.156	0.4741	0.8738	1	0.6827
10	rs2763366	71650837	G	0.3866	0.4796	T	8.101	0.004425	0.6837	0.1343	0.5254	0.8897	1	0.6827
11	rs16937996	44559898	T	0.2815	0.206	C	8.101	0.004425	1.51	0.1459	1.135	2.01	1	0.6827
1	rs7514673	236928589	T	0.08403	0.1504	C	8.1	0.004426	0.5183	0.235	0.327	0.8215	1	0.6827
1	rs1537818	39647038	G	0.4202	0.3323	A	8.099	0.00443	1.456	0.1327	1.122	1.889	1	0.6827
9	rs13287066	96178967	A	0.3814	0.2955	G	8.098	0.004431	1.469	0.136	1.126	1.919	1	0.6827
14	rs17107482	78857639	C	0.1303	0.07956	T	8.098	0.004431	1.732	0.1955	1.181	2.541	1	0.6827
10	rs7095162	65491733	G	0.3361	0.2548	A	8.095	0.004438	1.481	0.1388	1.128	1.944	1	0.6827
14	rs12588848	52354228	G	0.5	0.4084	T	8.095	0.004438	1.449	0.1309	1.121	1.872	1	0.6827
6	rs6942031	169191771	T	0.2395	0.3267	C	8.094	0.004441	0.649	0.1531	0.4807	0.8761	1	0.6827
8	rs10111313	96905699	G	0.2143	0.1479	A	8.093	0.004443	1.571	0.16	1.148	2.149	1	0.6827
15	rs1602457	98398846	G	0.06723	0.03344	A	8.093	0.004443	2.083	0.2637	1.242	3.493	1	0.6827
1	rs11582243	91556690	T	0.3529	0.2701	C	8.09	0.004451	1.474	0.1372	1.126	1.928	1	0.6827
1	rs10799256	4731689	C	0.2017	0.2857	T	8.086	0.004462	0.6317	0.1629	0.459	0.8693	1	0.6827
2	rs9646834	208526488	T	0.07563	0.0392	C	8.085	0.004463	2.005	0.2496	1.229	3.27	1	0.6827
10	rs1577074	119983056	G	0.07563	0.0392	A	8.085	0.004463	2.005	0.2496	1.229	3.27	1	0.6827
14	rs2295788	100404067	G	0.2059	0.2902	A	8.083	0.004468	0.6341	0.1616	0.462	0.8703	1	0.6827
1	rs10159458	11534053	C	0.4748	0.3842	A	8.081	0.004473	1.449	0.1311	1.12	1.874	1	0.6827
5	rs34677	33998768	A	0.1975	0.1339	C	8.081	0.004473	1.592	0.165	1.152	2.2	1	0.6827
2	rs61736715	54483272	A	0.07203	0.03659	C	8.079	0.004479	2.044	0.2568	1.236	3.381	1	0.6827
10	rs3814183	69934467	A	0.2802	0.2041	G	8.075	0.004487	1.518	0.1479	1.136	2.029	1	0.6827
18	rs477746	66929532	C	0.4538	0.3642	A	8.075	0.004488	1.45	0.1316	1.121	1.877	1	0.6827
19	rs6509215	45982780	G	0.1577	0.09961	T	8.075	0.004489	1.692	0.1871	1.172	2.441	1	0.6827
13	rs9566276	38498837	T	0.09223	0.1664	C	8.074	0.00449	0.5091	0.242	0.3168	0.8182	1	0.6827
15	rs7183955	61049569	C	0.2983	0.221	A	8.074	0.00449	1.499	0.1434	1.132	1.985	1	0.6827
1	rs138398671	215847857	A	0.008403	0.001318	G	8.072	0.004495	6.423	0.7529	1.468	28.09	1	0.6827
2	rs143973365	214013321	T	0.008403	0.001318	C	8.072	0.004495	6.423	0.7529	1.468	28.09	1	0.6827
3	rs200930835	9746457	A	0.008403	0.001318	G	8.072	0.004495	6.423	0.7529	1.468	28.09	1	0.6827
5	rs146432555	72868397	G	0.008403	0.001318	T	8.072	0.004495	6.423	0.7529	1.468	28.09	1	0.6827
6	rs143922663	84573964	A	0.008403	0.001318	G	8.072	0.004495	6.423	0.7529	1.468	28.09	1	0.6827
7	rs148906394	37355534	T	0.008403	0.001318	C	8.072	0.004495	6.423	0.7529	1.468	28.09	1	0.6827
13	rs80135321	25424583	C	0.008403	0.001318	T	8.072	0.004495	6.423	0.7529	1.468	28.09	1	0.6827
1	rs17853130	162343974	T	0.008403	0.001318	C	8.07	0.0045	6.422	0.7529	1.468	28.09	1	0.6827
1	rs149717541	227920668	A	0.008403	0.001318	G	8.07	0.0045	6.422	0.7529	1.468	28.09	1	0.6827
2	rs199846944	215797431	C	0.008403	0.001318	T	8.07	0.0045	6.422	0.7529	1.468	28.09	1	0.6827
3	rs140725914	195959323	G	0.008403	0.001318	A	8.07	0.0045	6.422	0.7529	1.468	28.09	1	0.6827
19	rs202111408	44680843	G	0.008403	0.001318	A	8.07	0.0045	6.422	0.7529	1.468	28.09	1	0.6827
19	rs8109437	58952327	G	0.008403	0.001318	A	8.07	0.0045	6.422	0.7529	1.468	28.09	1	0.6827
20	rs139278158	25442190	C	0.008403	0.001318	G	8.068	0.004504	6.421	0.7529	1.468	28.08	1	0.6827
10	rs4745969	64176173	G	0.2185	0.3039	A	8.067	0.004508	0.6405	0.1581	0.4698	0.8732	1	0.6827
3	rs6800044	179129882	C	0.008403	0.001318	T	8.067	0.004509	6.419	0.7529	1.468	28.08	1	0.6827
7	rs150551001	36462404	T	0.008403	0.001318	C	8.067	0.004509	6.419	0.7529	1.468	28.08	1	0.6827
11	rs920443	40423092	C	0.4832	0.3924	A	8.066	0.00451	1.448	0.131	1.12	1.872	1	0.6827
7	rs17164772	92380438	G	0.05882	0.1187	A	8.063	0.004517	0.4641	0.2769	0.2697	0.7986	1	0.6827
11	rs138059734	68748292	T	0.008403	0.001319	C	8.063	0.004518	6.417	0.7529	1.467	28.07	1	0.6827
15	rs1822846	68814079	G	0.3093	0.2306	T	8.058	0.004529	1.495	0.1425	1.13	1.976	1	0.6834
13	rs7321093	29147841	T	0.3697	0.4624	C	8.058	0.004531	0.6822	0.1355	0.5231	0.8897	1	0.6834
4	rs7673236	82825171	T	0.5	0.4087	C	8.047	0.004557	1.447	0.1309	1.119	1.87	1	0.6866
8	rs17070660	4438543	A	0.2311	0.1624	G	8.045	0.004562	1.55	0.1557	1.142	2.104	1	0.6868
12	rs139597094	7586260	C	0.008403	0.001321	T	8.043	0.004568	6.406	0.7529	1.465	28.02	1	0.6871
14	rs716315	96009307	C	0.5294	0.4373	T	8.039	0.004579	1.448	0.1311	1.119	1.872	1	0.688
4	rs9996025	64166391	A	0.02521	0.008178	G	8.029	0.004604	3.137	0.4256	1.362	7.224	1	0.6912
3	rs6777275	80918205	G	0.1429	0.08962	A	8.026	0.004612	1.693	0.1879	1.171	2.447	1	0.6912
1	rs6425820	33936347	T	0.3613	0.4536	C	8.025	0.004613	0.6815	0.1362	0.5219	0.8899	1	0.6912
14	rs7153989	74187423	G	0.2269	0.3127	A	8.016	0.004637	0.6451	0.156	0.4752	0.8759	1	0.6942
22	rs6000006	36191428	G	0.178	0.1177	A	8.011	0.00465	1.622	0.1726	1.157	2.276	1	0.6956
6	rs4715215	50960316	C	0.4916	0.4008	T	8.009	0.004654	1.446	0.131	1.118	1.869	1	0.6956
18	rs16971294	36540672	A	0.3487	0.2667	G	8.007	0.00466	1.472	0.1376	1.124	1.928	1	0.6957
10	rs12256403	28569959	G	0.5084	0.417	A	8.005	0.004664	1.446	0.131	1.118	1.869	1	0.6957
11	rs10770114	10422641	T	0.5	0.4089	G	8.003	0.004671	1.446	0.1309	1.118	1.868	1	0.6962
1	rs3738632	16574316	T	0.1261	0.1999	C	7.999	0.004679	0.5773	0.1966	0.3927	0.8488	1	0.6962
15	rs3736286	41105658	A	0.458	0.3686	G	7.999	0.00468	1.447	0.1315	1.119	1.873	1	0.6962
2	rs2160389	39830183	C	0.02101	0.006177	T	7.998	0.004684	3.453	0.4666	1.384	8.616	1	0.6962
2	rs10497572	181647026	C	0.2521	0.3396	T	7.992	0.004699	0.6554	0.1505	0.488	0.8803	1	0.6968
11	rs11604232	6585032	A	0.03782	0.015	G	7.991	0.0047	2.58	0.3479	1.305	5.103	1	0.6968
18	rs8092033	36526657	G	0.3487	0.2668	A	7.989	0.004706	1.472	0.1376	1.124	1.927	1	0.6968
7	rs10447854	127795804	C	0.3151	0.2364	T	7.986	0.004714	1.487	0.1412	1.127	1.96	1	0.6968
5	rs142275296	148729263	A	0.0	0.03671	G	7.985	0.004718	0.0	inf	0.0	nan	1	0.6968
10	rs4918025	105342866	C	0.3571	0.2745	T	7.984	0.004719	1.469	0.1368	1.123	1.92	1	0.6968
3	rs199584688	16411695	A	0.004202	0.04028	C	7.982	0.004723	0.1005	1.004	0.01406	0.7188	1	0.6968
1	rs1325923	89415576	T	0.3856	0.4783	C	7.982	0.004724	0.6844	0.135	0.5253	0.8917	1	0.6968
7	rs7784410	96188993	G	0.2034	0.2873	A	7.981	0.004726	0.6335	0.163	0.4603	0.8718	1	0.6968
19	rs1506684	51371419	A	0.3276	0.4199	G	7.975	0.004743	0.673	0.1411	0.5104	0.8874	1	0.6984
2	rs1866233	231799552	G	0.1992	0.2826	A	7.974	0.004745	0.6314	0.1642	0.4576	0.8711	1	0.6984
8	rs10505222	115543245	G	0.05042	0.1074	A	7.967	0.004763	0.4415	0.2977	0.2463	0.7913	1	0.7
9	rs12353094	7543336	A	0.1891	0.1273	G	7.965	0.004768	1.599	0.1678	1.151	2.221	1	0.7
9	rs10979978	112406744	T	0.1887	0.2759	C	7.965	0.004769	0.6103	0.1767	0.4316	0.8629	1	0.7
4	rs7689414	157608245	C	0.3571	0.4489	T	7.954	0.004797	0.682	0.1365	0.5219	0.8912	1	0.7026
10	rs7071044	98348595	A	0.07563	0.1393	G	7.954	0.004798	0.5055	0.2466	0.3118	0.8195	1	0.7026
17	rs3751911	80615643	A	0.1933	0.1308	G	7.95	0.004809	1.592	0.1663	1.149	2.206	1	0.7026
2	rs1993218	35266175	C	0.1345	0.2093	T	7.949	0.00481	0.5867	0.1913	0.4032	0.8536	1	0.7026
3	rs2679232	101892214	G	0.2311	0.1627	T	7.949	0.004812	1.546	0.1557	1.139	2.098	1	0.7026
2	rs934995	224318539	C	0.4412	0.3529	T	7.947	0.004817	1.448	0.132	1.118	1.875	1	0.7026
19	rs283168	22450922	A	0.2941	0.2178	G	7.946	0.004819	1.497	0.144	1.129	1.984	1	0.7026
1	rs623183	22986631	A	0.09244	0.1598	G	7.946	0.004821	0.5354	0.2252	0.3444	0.8325	1	0.7026
16	rs7193473	66600479	A	0.1429	0.08985	G	7.938	0.004841	1.688	0.1879	1.168	2.44	1	0.7049
8	rs11775921	4232963	T	0.1106	0.1836	C	7.925	0.004876	0.5531	0.2134	0.3641	0.8403	1	0.7086
10	rs11198332	120019296	A	0.05882	0.02807	G	7.925	0.004876	2.164	0.281	1.248	3.753	1	0.7086
7	rs6952409	50462935	A	0.2857	0.2104	G	7.924	0.004879	1.501	0.1452	1.129	1.995	1	0.7086
19	rs2240158	1005230	T	0.3178	0.4087	C	7.919	0.004892	0.6741	0.141	0.5113	0.8887	1	0.7098
12	rs4965015	62403753	A	0.1134	0.1847	C	7.915	0.004902	0.5648	0.2058	0.3773	0.8453	1	0.7099
6	rs9381943	51087083	G	0.1387	0.214	A	7.911	0.004913	0.5914	0.1889	0.4084	0.8563	1	0.7099
21	rs444223	20300576	C	0.1144	0.1861	T	7.909	0.004918	0.5648	0.2058	0.3773	0.8455	1	0.7099
1	rs2271885	110921715	G	0.02101	0.06663	T	7.908	0.004921	0.3006	0.4534	0.1236	0.7311	1	0.7099
2	rs4668706	11154991	C	0.5556	0.463	A	7.907	0.004923	1.45	0.1328	1.118	1.881	1	0.7099
2	rs6742257	33790330	G	0.2647	0.192	A	7.907	0.004923	1.515	0.1487	1.132	2.028	1	0.7099
1	rs117242156	12081895	A	0.0	0.03217	G	7.906	0.004927	0.0	inf	0.0	nan	1	0.7099
16	rs61735055	20975505	C	0.03782	0.01507	T	7.905	0.00493	2.568	0.3479	1.299	5.078	1	0.7099
6	rs1048886	71289189	G	0.2941	0.218	A	7.904	0.004933	1.495	0.144	1.127	1.982	1	0.7099
13	rs9317116	60929692	T	0.2754	0.2011	C	7.903	0.004936	1.51	0.1475	1.131	2.016	1	0.7099
20	rs884851	62099296	T	0.1261	0.1994	C	7.901	0.004941	0.5792	0.1966	0.394	0.8516	1	0.71
16	rs138029334	20752865	C	0.0	0.03215	T	7.899	0.004947	0.0	inf	0.0	nan	1	0.7101
13	rs1538187	98514241	G	0.3319	0.4227	A	7.898	0.00495	0.6784	0.1389	0.5168	0.8907	1	0.7101
6	rs9348153	158643526	T	0.1891	0.1275	C	7.888	0.004976	1.595	0.1678	1.148	2.216	1	0.7131
10	rs36023427	99218456	T	0.01681	0.004366	C	7.882	0.004993	3.898	0.5227	1.399	10.86	1	0.7131
6	rs7744909	146566245	G	0.1092	0.06399	A	7.88	0.004998	1.794	0.2111	1.186	2.713	1	0.7131
6	rs139012879	136599585	T	0.01681	0.004367	C	7.878	0.005005	3.897	0.5227	1.399	10.86	1	0.7131
6	rs16882922	19911852	T	0.09664	0.05461	C	7.875	0.005012	1.852	0.223	1.196	2.867	1	0.7131
3	rs1112706	131522552	C	0.4538	0.3653	T	7.874	0.005016	1.444	0.1316	1.116	1.868	1	0.7131
3	rs10440086	68305892	A	0.3193	0.4096	G	7.871	0.005023	0.6763	0.1403	0.5138	0.8903	1	0.7131
9	rs41307447	82267611	C	0.01681	0.004342	G	7.871	0.005023	3.92	0.5255	1.4	10.98	1	0.7131
9	rs34417623	78638797	T	0.01681	0.004369	C	7.871	0.005024	3.895	0.5227	1.398	10.85	1	0.7131
1	rs12076073	154944156	G	0.07563	0.03955	A	7.87	0.005026	1.987	0.2495	1.218	3.241	1	0.7131
2	rs56201325	179437928	C	0.01261	0.002718	T	7.87	0.005026	4.684	0.6066	1.427	15.38	1	0.7131
7	rs141952919	103061825	G	0.01261	0.002718	A	7.868	0.005032	4.684	0.6066	1.426	15.38	1	0.7131
13	rs7338233	44002538	G	0.04202	0.09578	A	7.867	0.005034	0.414	0.3246	0.2192	0.7822	1	0.7131
1	rs200004121	35251075	C	0.0	0.03202	A	7.866	0.005038	0.0	inf	0.0	nan	1	0.7131
1	rs12562637	2924666	T	0.01261	0.002719	C	7.864	0.005043	4.682	0.6066	1.426	15.37	1	0.7131
11	rs10894162	129781016	T	0.04202	0.01758	C	7.864	0.005044	2.451	0.3304	1.283	4.684	1	0.7131
16	rs148471217	1825356	C	0.0	0.03229	A	7.863	0.005045	0.0	inf	0.0	nan	1	0.7131
1	rs12046038	11525533	G	0.3361	0.2559	A	7.861	0.005051	1.472	0.1388	1.122	1.933	1	0.7133
6	rs2110904	107594771	C	0.4118	0.3257	T	7.86	0.005055	1.449	0.1331	1.117	1.882	1	0.7133
21	rs421241	18276053	A	0.07143	0.1336	G	7.856	0.005066	0.4988	0.2531	0.3037	0.8192	1	0.7136
3	rs605795	109635659	C	0.2815	0.37	T	7.855	0.005067	0.6671	0.1454	0.5018	0.887	1	0.7136
7	rs257114	41830184	A	0.2647	0.1922	G	7.854	0.00507	1.513	0.1487	1.13	2.025	1	0.7136
7	rs7777206	26654077	A	0.1597	0.2375	G	7.847	0.005089	0.6099	0.1782	0.4301	0.865	1	0.7145
7	rs76229426	47408299	A	0.0	0.03538	G	7.845	0.005097	0.0	inf	0.0	nan	1	0.7145
17	rs721957	39137297	C	0.3571	0.4483	T	7.845	0.005097	0.6837	0.1365	0.5232	0.8935	1	0.7145
20	rs6090155	61527378	A	0.3008	0.2239	G	7.844	0.005099	1.491	0.1436	1.125	1.976	1	0.7145
12	rs1025692	70513806	G	0.1218	0.07368	A	7.843	0.005102	1.744	0.2012	1.176	2.588	1	0.7145
2	rs4552182	219184872	G	0.2941	0.3831	T	7.839	0.005112	0.6709	0.1435	0.5064	0.8887	1	0.7145
2	rs6430612	137006198	T	0.5252	0.4343	C	7.838	0.005115	1.441	0.1311	1.114	1.863	1	0.7145
10	rs11598926	79364564	A	0.3151	0.237	G	7.838	0.005115	1.481	0.1412	1.123	1.953	1	0.7145
14	rs945272	56336645	A	0.04622	0.1012	G	7.838	0.005116	0.4302	0.3102	0.2342	0.7902	1	0.7145
10	rs7097552	82854879	A	0.5042	0.4139	G	7.833	0.005129	1.44	0.1309	1.114	1.861	1	0.7151
1	rs7523343	230230759	G	0.1356	0.2104	A	7.833	0.00513	0.5888	0.1914	0.4046	0.8568	1	0.7151
16	rs8063973	84460926	A	0.1387	0.2135	G	7.831	0.005135	0.5929	0.1889	0.4095	0.8585	1	0.7151
7	rs6464622	144542022	T	0.2412	0.329	C	7.829	0.005142	0.6484	0.156	0.4776	0.8803	1	0.7151
3	rs140939168	112736411	T	0.02941	0.01046	C	7.828	0.005144	2.866	0.3939	1.325	6.203	1	0.7151
7	rs3747806	87106702	G	0.07563	0.03961	A	7.827	0.005146	1.984	0.2495	1.216	3.235	1	0.7151
1	rs12036063	233304042	C	0.105	0.06096	T	7.824	0.005155	1.808	0.2148	1.187	2.755	1	0.7155
6	rs77549166	146158052	A	0.07563	0.03962	G	7.823	0.005158	1.983	0.2495	1.216	3.234	1	0.7155
12	rs1553404	128106951	G	0.3908	0.3063	A	7.821	0.005165	1.453	0.1343	1.117	1.89	1	0.7155
19	rs12981220	23021400	C	0.1092	0.1792	A	7.82	0.005166	0.5616	0.2091	0.3727	0.8461	1	0.7155
19	rs4807425	3229224	A	0.2731	0.1998	G	7.817	0.005177	1.505	0.1472	1.128	2.009	1	0.7161
18	rs6506336	5843069	C	0.008403	0.04673	T	7.814	0.005184	0.1729	0.7114	0.04288	0.6971	1	0.7161
1	rs12080837	182786953	T	0.03361	0.01277	C	7.808	0.005201	2.69	0.3686	1.306	5.54	1	0.7161
17	rs17499409	10781802	A	0.2227	0.3069	G	7.808	0.005201	0.6469	0.157	0.4755	0.8801	1	0.7161
4	rs17292275	63355299	G	0.03782	0.01516	A	7.808	0.005202	2.554	0.3478	1.291	5.05	1	0.7161
19	rs139556174	41248583	G	0.0	0.03181	A	7.807	0.005204	0.0	inf	0.0	nan	1	0.7161
3	rs353093	15224983	T	0.3109	0.2334	C	7.807	0.005205	1.482	0.1417	1.123	1.956	1	0.7161
5	rs2530223	141014494	T	0.437	0.3497	C	7.807	0.005205	1.443	0.1321	1.114	1.87	1	0.7161
2	rs13397382	154510972	T	0.1008	0.1692	C	7.802	0.00522	0.5508	0.2166	0.3603	0.8421	1	0.7173
3	rs17039221	14308924	A	0.1176	0.189	G	7.8	0.005226	0.572	0.2026	0.3846	0.8508	1	0.7173
20	rs6095130	47084228	A	0.4706	0.3817	G	7.799	0.005228	1.44	0.1312	1.113	1.862	1	0.7173
1	rs41269803	14105291	A	0.02966	0.01057	G	7.794	0.005242	2.861	0.394	1.322	6.194	1	0.7186
6	rs12198921	4058782	C	0.3445	0.4351	T	7.793	0.005245	0.6825	0.1376	0.5211	0.8938	1	0.7186
15	rs17271667	62657278	C	0.2437	0.1742	T	7.79	0.005254	1.528	0.1529	1.132	2.061	1	0.7192
12	rs2593996	32454285	A	0.563	0.4718	G	7.786	0.005264	1.442	0.1319	1.114	1.868	1	0.7196
13	rs9568280	50184874	T	0.1186	0.1905	C	7.785	0.005268	0.5722	0.2026	0.3847	0.8512	1	0.7196
4	rs10937780	7048842	A	0.479	0.3899	G	7.782	0.005276	1.439	0.1311	1.113	1.86	1	0.7196
11	rs7106136	64748278	T	0.004202	0.03945	G	7.782	0.005278	0.1027	1.003	0.01438	0.7339	1	0.7196
4	rs2286455	16020162	T	0.1765	0.1174	C	7.781	0.005279	1.61	0.1724	1.149	2.257	1	0.7196
19	rs112545413	39207742	A	0.0	0.03193	G	7.779	0.005285	0.0	inf	0.0	nan	1	0.7198
10	rs2447112	60754780	A	0.3782	0.2948	G	7.778	0.005289	1.455	0.1351	1.116	1.896	1	0.7198
2	rs76547437	228230945	A	0.2143	0.1491	G	7.773	0.005304	1.557	0.16	1.138	2.13	1	0.7212
7	rs310597	150873046	G	0.4916	0.4021	A	7.77	0.005311	1.438	0.131	1.112	1.859	1	0.7216
5	rs56005928	156675985	A	0.03361	0.0128	G	7.769	0.005316	2.684	0.3686	1.303	5.527	1	0.7217
5	rs4912761	140881474	G	0.5882	0.497	T	7.766	0.005324	1.446	0.133	1.114	1.876	1	0.7218
6	rs6912584	28309590	C	0.2437	0.1743	T	7.765	0.005326	1.527	0.1529	1.131	2.06	1	0.7218
6	rs508557	75318021	T	0.07983	0.04268	C	7.764	0.00533	1.946	0.2433	1.208	3.136	1	0.7218
19	rs12609346	20892999	T	0.3866	0.3027	C	7.76	0.00534	1.452	0.1346	1.115	1.89	1	0.7226
4	rs144936999	73012954	C	0.0	0.03212	G	7.757	0.00535	0.0	inf	0.0	nan	1	0.7233
8	rs381349	81451995	A	0.1681	0.1106	G	7.754	0.005359	1.624	0.1757	1.151	2.292	1	0.7234
15	rs8039239	87436369	T	0.5168	0.4266	C	7.754	0.00536	1.438	0.131	1.112	1.858	1	0.7234
1	rs10914953	34919266	C	0.1933	0.2744	T	7.75	0.005371	0.6334	0.1654	0.458	0.8759	1	0.7237
7	rs2868813	77405741	C	0.3613	0.452	T	7.748	0.005378	0.686	0.1362	0.5253	0.8958	1	0.7237
3	rs6804537	184897801	T	0.1008	0.05798	C	7.747	0.005379	1.822	0.2187	1.187	2.797	1	0.7237
19	rs3745642	30414587	T	0.07143	0.1332	G	7.746	0.005382	0.5008	0.2534	0.3048	0.8228	1	0.7237
7	rs12536871	82001859	G	0.3547	0.4459	T	7.74	0.005401	0.6829	0.1379	0.5212	0.8948	1	0.7237
3	rs2134773	6189342	C	0.2311	0.1635	T	7.739	0.005405	1.537	0.1557	1.133	2.086	1	0.7237
1	rs12134379	227325759	G	0.1176	0.1887	A	7.738	0.005407	0.5733	0.2025	0.3855	0.8527	1	0.7237
8	rs4618695	15109424	T	0.2647	0.3515	G	7.734	0.005419	0.6641	0.1482	0.4968	0.8879	1	0.7237
2	rs4528715	239486710	T	0.3613	0.4519	C	7.733	0.005424	0.6862	0.1362	0.5255	0.8962	1	0.7237
6	rs9349146	12245416	G	0.3403	0.4304	A	7.732	0.005425	0.6828	0.138	0.5209	0.8949	1	0.7237
12	rs76457071	50972884	G	0.07627	0.04012	T	7.732	0.005425	1.976	0.2496	1.211	3.222	1	0.7237
11	rs4307696	36906202	A	0.09244	0.05181	G	7.731	0.005427	1.864	0.2275	1.193	2.911	1	0.7237
13	rs2477466	111971579	G	0.1975	0.2789	A	7.73	0.005432	0.6361	0.1641	0.4611	0.8773	1	0.7237
3	rs2306875	4712413	G	0.1891	0.2697	A	7.729	0.005433	0.6314	0.1668	0.4553	0.8756	1	0.7237
3	rs12185995	105960464	T	0.2731	0.2001	C	7.729	0.005433	1.502	0.1472	1.125	2.004	1	0.7237
17	rs58337165	1684605	T	0.0	0.03147	G	7.727	0.005439	0.0	inf	0.0	nan	1	0.7237
20	rs6079602	14884301	G	0.2395	0.1708	A	7.727	0.005439	1.529	0.1538	1.131	2.066	1	0.7237
3	rs1497409	87358064	A	0.05556	0.1135	G	7.727	0.005441	0.4594	0.2869	0.2618	0.806	1	0.7237
1	rs2312283	188629757	G	0.08403	0.1485	A	7.724	0.00545	0.5261	0.235	0.3319	0.8339	1	0.7243
6	rs9392016	3845399	C	0.04237	0.01787	T	7.719	0.005463	2.432	0.3303	1.273	4.646	1	0.7254
12	rs10794459	132686788	A	0.4538	0.3661	C	7.716	0.005474	1.438	0.1316	1.111	1.861	1	0.7264
5	rs2312187	155982551	T	0.3992	0.49	C	7.714	0.005479	0.6914	0.1336	0.5321	0.8983	1	0.7264
20	rs6105077	1386395	T	0.437	0.3502	G	7.709	0.005494	1.44	0.1321	1.112	1.866	1	0.7278
7	rs10953189	96220622	C	0.2246	0.3087	A	7.707	0.005501	0.6484	0.1572	0.4765	0.8824	1	0.7282
1	rs6604133	109074350	G	0.1008	0.1687	A	7.703	0.005513	0.5528	0.2166	0.3616	0.8452	1	0.7291
22	rs5754611	33962949	G	0.4034	0.4942	A	7.698	0.005527	0.6921	0.1334	0.5329	0.8988	1	0.7304
2	rs7604413	122694063	A	0.2059	0.288	G	7.697	0.005532	0.641	0.1616	0.467	0.8798	1	0.7304
12	rs1863915	101110685	C	0.2647	0.1929	T	7.694	0.005541	1.506	0.1487	1.126	2.016	1	0.7304
4	rs2391598	131018271	T	0.2815	0.369	C	7.693	0.005545	0.6699	0.1454	0.5039	0.8907	1	0.7304
19	rs717680	32021999	A	0.2101	0.1458	G	7.692	0.005548	1.558	0.1612	1.136	2.137	1	0.7304
2	rs6716985	191552398	A	0.416	0.3305	G	7.691	0.005551	1.443	0.1329	1.112	1.872	1	0.7304
3	rs2350310	13637116	C	0.1975	0.1352	T	7.687	0.00556	1.574	0.165	1.139	2.175	1	0.7304
2	rs11887255	58833651	T	0.1807	0.2601	C	7.687	0.005561	0.6272	0.1697	0.4497	0.8747	1	0.7304
17	rs437680	74828093	G	0.1723	0.1143	A	7.687	0.005562	1.613	0.174	1.147	2.268	1	0.7304
14	rs7156885	92952680	T	0.2227	0.3062	C	7.68	0.005584	0.6492	0.1571	0.4772	0.8832	1	0.7319
20	rs6078503	12269409	A	0.2437	0.1746	G	7.68	0.005585	1.523	0.1529	1.129	2.055	1	0.7319
18	rs12458218	22575871	T	0.1429	0.2262	C	7.679	0.005587	0.5703	0.2053	0.3814	0.8528	1	0.7319
17	rs11078597	1618363	C	0.09244	0.1584	T	7.674	0.005602	0.541	0.2252	0.348	0.8412	1	0.7328
19	rs4933025	22874166	A	0.07143	0.1327	C	7.674	0.005603	0.5027	0.2532	0.306	0.8256	1	0.7328
10	rs1112284	24790393	G	0.2331	0.3177	A	7.671	0.005612	0.6525	0.1553	0.4813	0.8846	1	0.7334
9	rs16937827	19912414	G	0.05882	0.02841	A	7.666	0.005627	2.137	0.2808	1.232	3.706	1	0.7347
19	rs10427066	56785408	T	0.1008	0.1684	C	7.66	0.005647	0.5537	0.2166	0.3622	0.8466	1	0.7363
11	rs12792409	12945058	G	0.2754	0.2022	T	7.657	0.005654	1.5	0.1475	1.123	2.002	1	0.7363
14	rs6575129	90843792	T	0.178	0.2573	G	7.656	0.005657	0.6248	0.1715	0.4465	0.8744	1	0.7363
5	rs7718574	125989661	G	0.3529	0.2722	A	7.653	0.005667	1.458	0.1372	1.115	1.908	1	0.7363
18	rs16947515	5049796	T	0.01261	0.002768	C	7.652	0.005672	4.6	0.6066	1.401	15.1	1	0.7363
12	rs11104703	88379788	T	0.1092	0.0645	C	7.651	0.005674	1.779	0.2111	1.176	2.69	1	0.7363
8	rs4310223	131642621	T	0.2101	0.2923	C	7.65	0.005676	0.6439	0.1604	0.4703	0.8818	1	0.7363
5	rs2010548	22458871	T	0.3361	0.2569	G	7.65	0.005678	1.465	0.1388	1.116	1.923	1	0.7363
4	rs1450476	121784013	T	0.1345	0.2077	C	7.647	0.005685	0.5926	0.1913	0.4073	0.8622	1	0.7363
7	rs940041	29187251	G	0.01681	0.004447	A	7.647	0.005688	3.827	0.5224	1.375	10.65	1	0.7363
17	rs17849804	46929982	G	0.01681	0.004447	A	7.647	0.005688	3.827	0.5224	1.375	10.65	1	0.7363
17	rs61743692	80676855	T	0.01681	0.004448	A	7.644	0.005695	3.826	0.5224	1.374	10.65	1	0.7363
2	rs10180226	66209485	T	0.3025	0.2266	G	7.643	0.0057	1.48	0.1428	1.119	1.958	1	0.7363
12	rs1517725	76653004	G	0.1598	0.2458	A	7.641	0.005705	0.5837	0.1971	0.3967	0.8589	1	0.7363
6	rs319124	107721094	T	0.3992	0.4896	C	7.641	0.005706	0.6925	0.1337	0.5329	0.8998	1	0.7363
17	rs962449	71766199	T	0.5455	0.4518	C	7.64	0.00571	1.456	0.1366	1.114	1.903	1	0.7363
10	rs11014611	25856412	G	0.2815	0.3687	A	7.635	0.005724	0.6709	0.1454	0.5046	0.8921	1	0.7364
11	rs1784684	113939539	G	0.08824	0.1532	A	7.635	0.005724	0.5351	0.2299	0.341	0.8398	1	0.7364
5	rs852586	10955988	T	0.3109	0.3994	C	7.635	0.005725	0.6784	0.1413	0.5143	0.8948	1	0.7364
10	rs141939315	61802477	T	0.02101	0.006342	C	7.631	0.005736	3.362	0.4662	1.348	8.385	1	0.7366
10	rs12779966	64169941	G	0.2331	0.3174	A	7.628	0.005745	0.6534	0.1552	0.482	0.8857	1	0.7366
7	rs7811116	151014615	G	0.1218	0.193	A	7.628	0.005747	0.5802	0.1995	0.3924	0.8578	1	0.7366
7	rs13226529	28316074	G	0.2353	0.1676	A	7.626	0.005752	1.528	0.1547	1.129	2.07	1	0.7366
9	rs10759387	112787897	G	0.3403	0.2608	T	7.624	0.005758	1.462	0.1384	1.115	1.918	1	0.7366
6	rs73740554	52628277	T	0.0	0.0311	C	7.622	0.005765	0.0	inf	0.0	nan	1	0.7366
20	rs200496231	17605271	C	0.0	0.03132	T	7.622	0.005765	0.0	inf	0.0	nan	1	0.7366
10	rs1002588	45126974	A	0.1891	0.2691	G	7.622	0.005766	0.6334	0.1668	0.4568	0.8783	1	0.7366
10	rs10510004	116224579	A	0.4328	0.3467	G	7.622	0.005767	1.438	0.1322	1.11	1.863	1	0.7366
17	rs1057335	1657653	A	0.09664	0.1632	G	7.617	0.005782	0.5486	0.2208	0.3559	0.8456	1	0.738
16	rs7196049	63789337	G	0.5504	0.4604	A	7.613	0.005795	1.435	0.1316	1.109	1.857	1	0.739
11	rs9736426	3597515	G	0.2477	0.336	A	7.61	0.005803	0.6509	0.1568	0.4787	0.8851	1	0.7396
18	rs900967	43196604	C	0.2203	0.3036	T	7.609	0.005808	0.6483	0.1583	0.4754	0.8842	1	0.7396
3	rs6778728	159997061	A	0.2059	0.2875	T	7.607	0.005815	0.6426	0.1616	0.4682	0.8821	1	0.7399
2	rs13001342	79991610	C	0.2564	0.1855	T	7.604	0.005824	1.514	0.1515	1.125	2.038	1	0.7401
8	rs10110636	143233312	G	0.5168	0.4275	A	7.603	0.005826	1.433	0.131	1.108	1.852	1	0.7401
4	rs6858365	12172669	T	0.02521	0.008414	C	7.602	0.00583	3.048	0.4253	1.324	7.014	1	0.7401
2	rs11886793	103072220	G	0.3487	0.2686	T	7.6	0.005837	1.458	0.1375	1.113	1.909	1	0.7404
14	rs17616128	41766444	T	0.3109	0.2343	C	7.596	0.005851	1.474	0.1417	1.117	1.946	1	0.7416
20	rs6016710	40808844	C	0.2563	0.3417	T	7.591	0.005864	0.6638	0.1497	0.495	0.8902	1	0.7421
7	rs6947941	99156446	T	0.1441	0.09158	G	7.59	0.00587	1.67	0.188	1.155	2.413	1	0.7421
11	rs12291120	80132486	A	0.2227	0.1569	G	7.59	0.005871	1.54	0.1578	1.13	2.097	1	0.7421
6	rs1154029	153880741	T	0.5678	0.4773	C	7.589	0.005873	1.438	0.1327	1.109	1.866	1	0.7421
19	rs10412613	52712828	G	0.3908	0.3074	A	7.587	0.005879	1.445	0.1343	1.11	1.88	1	0.7421
3	rs13062241	14923230	C	0.3739	0.4638	T	7.585	0.005886	0.6905	0.1352	0.5298	0.9	1	0.7421
19	rs749818	46496793	C	0.3824	0.4723	A	7.585	0.005886	0.6916	0.1346	0.5312	0.9004	1	0.7421
17	rs11077986	80280865	G	0.3866	0.4766	A	7.583	0.005893	0.6921	0.1343	0.5319	0.9006	1	0.7424
3	rs4894277	135025212	A	0.5378	0.4482	G	7.576	0.005914	1.433	0.1313	1.108	1.853	1	0.744
19	rs4805033	33839554	G	0.5252	0.4358	A	7.575	0.005918	1.432	0.1311	1.107	1.851	1	0.744
2	rs2464989	6038606	G	0.1303	0.08088	A	7.575	0.00592	1.702	0.1954	1.16	2.496	1	0.744
18	rs1456610	41843945	A	0.3361	0.2573	G	7.57	0.005935	1.462	0.1388	1.114	1.919	1	0.7454
19	rs283165	22453422	C	0.2941	0.2194	T	7.568	0.005941	1.482	0.144	1.118	1.966	1	0.7454
16	rs2726039	28327463	A	0.2647	0.3505	G	7.567	0.005945	0.667	0.1482	0.4989	0.8918	1	0.7454
6	rs6935921	161108536	C	0.2395	0.3236	T	7.565	0.005951	0.6582	0.1531	0.4876	0.8886	1	0.7454
1	rs1779819	182178482	A	0.3697	0.2881	G	7.564	0.005953	1.45	0.1358	1.111	1.892	1	0.7454
11	rs2283240	17943876	T	0.5252	0.4359	C	7.561	0.005965	1.431	0.1311	1.107	1.851	1	0.7455
13	rs9551048	24636756	A	0.1525	0.2282	G	7.56	0.005966	0.6087	0.1823	0.4258	0.8702	1	0.7455
3	rs6768755	60286486	T	0.584	0.4941	C	7.56	0.005969	1.438	0.1328	1.108	1.865	1	0.7455
3	rs1965848	125866026	A	0.5126	0.4236	G	7.558	0.005975	1.431	0.131	1.107	1.85	1	0.7455
7	rs39062	29256568	A	0.4286	0.3431	G	7.557	0.005977	1.436	0.1324	1.108	1.862	1	0.7455
2	rs6738503	239489888	G	0.3571	0.4465	A	7.553	0.005993	0.6886	0.1365	0.527	0.8998	1	0.7464
18	rs2861867	36639649	G	0.3697	0.2882	A	7.552	0.005993	1.449	0.1358	1.111	1.891	1	0.7464
3	rs3772883	81802802	T	0.458	0.371	C	7.55	0.006002	1.432	0.1315	1.107	1.853	1	0.747
21	rs6517050	16211191	G	0.3475	0.437	T	7.547	0.006011	0.6859	0.138	0.5233	0.8989	1	0.7475
4	rs6844114	190745892	A	0.1429	0.09092	G	7.542	0.006028	1.666	0.1879	1.153	2.408	1	0.749
12	rs7963143	16934292	A	0.4538	0.3671	G	7.539	0.006036	1.432	0.1316	1.107	1.854	1	0.749
11	rs11226125	103912968	T	0.5798	0.49	C	7.537	0.006046	1.436	0.1326	1.108	1.863	1	0.749
2	rs7564177	152849625	T	0.4034	0.3195	G	7.536	0.006047	1.44	0.1336	1.108	1.871	1	0.749
2	rs3791251	167262353	G	0.04622	0.09982	C	7.533	0.006059	0.437	0.3102	0.2379	0.8027	1	0.749
10	rs16936947	36621986	A	0.06723	0.03426	G	7.532	0.00606	2.032	0.2636	1.212	3.406	1	0.749
7	rs139487685	107596043	G	0.01261	0.0028	A	7.531	0.006065	4.546	0.6059	1.387	14.91	1	0.749
8	rs150114293	39103683	A	0.01261	0.002801	G	7.529	0.006072	4.545	0.6059	1.386	14.9	1	0.749
11	rs139226873	56409276	G	0.01261	0.002801	T	7.529	0.006072	4.545	0.6059	1.386	14.9	1	0.749
16	rs55790011	3900713	C	0.01261	0.002801	G	7.529	0.006072	4.545	0.6059	1.386	14.9	1	0.749
7	rs13234640	3848455	T	0.02101	0.06501	C	7.527	0.006077	0.3086	0.4535	0.1269	0.7506	1	0.749
20	rs7274963	18290979	G	0.1134	0.1826	A	7.527	0.006078	0.5727	0.2057	0.3826	0.8571	1	0.749
13	rs9517095	98506121	A	0.4698	0.3815	G	7.523	0.006091	1.437	0.1329	1.108	1.864	1	0.7493
14	rs45496292	74422545	G	0.01261	0.002802	A	7.523	0.006091	4.543	0.6059	1.386	14.9	1	0.7493
8	rs965660	103597492	G	0.06303	0.1215	A	7.522	0.006096	0.4864	0.2684	0.2874	0.8231	1	0.7493
19	rs7253166	20858625	C	0.3403	0.2613	T	7.518	0.006107	1.458	0.1384	1.112	1.913	1	0.7493
8	rs111851716	144999874	A	0.0	0.03115	G	7.516	0.006116	0.0	inf	0.0	nan	1	0.7493
2	rs988583	198987935	A	0.08403	0.04612	C	7.514	0.006124	1.897	0.2376	1.191	3.023	1	0.7493
18	rs1365461	36102806	A	0.3319	0.4204	C	7.513	0.006126	0.6849	0.1389	0.5217	0.8991	1	0.7493
16	rs2268049	1371154	T	0.07143	0.1319	C	7.511	0.006133	0.5063	0.2531	0.3083	0.8314	1	0.7493
11	rs988659	20291315	A	0.2059	0.1429	G	7.509	0.006138	1.555	0.1624	1.131	2.138	1	0.7493
5	rs6896002	21588931	A	0.3739	0.4633	C	7.506	0.00615	0.6918	0.1352	0.5308	0.9017	1	0.7493
5	rs10040369	86059399	T	0.3445	0.2652	C	7.504	0.006155	1.456	0.1379	1.111	1.908	1	0.7493
22	rs112544	21346485	T	0.1933	0.273	C	7.501	0.006168	0.638	0.1654	0.4613	0.8823	1	0.7493
1	rs6427494	159738719	T	0.3866	0.4761	G	7.499	0.006174	0.6935	0.1343	0.533	0.9024	1	0.7493
11	rs7123970	9171775	G	0.2479	0.3322	A	7.497	0.006179	0.6626	0.1514	0.4925	0.8914	1	0.7493
1	rs6697388	203767822	G	0.105	0.1725	T	7.494	0.006191	0.5629	0.2128	0.3709	0.8541	1	0.7493
15	rs7165578	52779259	G	0.1239	0.1954	A	7.494	0.006192	0.5826	0.1997	0.3939	0.8617	1	0.7493
6	rs4708493	169175214	C	0.06303	0.03146	T	7.492	0.006196	2.071	0.2718	1.216	3.527	1	0.7493
7	rs4988515	45932600	T	0.07759	0.04122	C	7.491	0.006201	1.956	0.2497	1.199	3.192	1	0.7493
5	rs1560036	175260372	A	0.2773	0.3634	G	7.487	0.006213	0.6723	0.146	0.505	0.8951	1	0.7493
16	rs902552	86410738	A	0.4412	0.3554	G	7.485	0.00622	1.432	0.1319	1.106	1.855	1	0.7493
4	rs4689536	6738883	T	0.2773	0.2049	C	7.484	0.006224	1.489	0.1465	1.118	1.985	1	0.7493
13	rs9315204	33693837	T	0.3067	0.2311	C	7.48	0.006239	1.472	0.1422	1.114	1.945	1	0.7493
4	rs16886566	12028032	T	0.2941	0.381	C	7.479	0.006241	0.677	0.1435	0.5111	0.8969	1	0.7493
18	rs2849203	41814969	C	0.3445	0.2654	T	7.479	0.006241	1.455	0.1379	1.11	1.907	1	0.7493
19	rs148557515	4446402	A	0.0	0.03048	G	7.472	0.006266	0.0	inf	0.0	nan	1	0.7493
6	rs1794856	12216646	A	0.3109	0.3985	G	7.472	0.006268	0.6812	0.1413	0.5165	0.8985	1	0.7493
1	rs10494193	117544879	C	0.008403	0.0014	T	7.471	0.00627	6.044	0.7504	1.389	26.31	1	0.7493
1	rs148310730	169349811	A	0.008403	0.0014	G	7.471	0.00627	6.044	0.7504	1.389	26.31	1	0.7493
2	rs55849640	56145171	G	0.008403	0.0014	T	7.471	0.00627	6.044	0.7504	1.389	26.31	1	0.7493
4	rs151291552	8469935	T	0.008403	0.0014	C	7.471	0.00627	6.044	0.7504	1.389	26.31	1	0.7493
7	rs200382652	51097237	C	0.008403	0.0014	T	7.471	0.00627	6.044	0.7504	1.389	26.31	1	0.7493
15	rs61753848	65988709	T	0.008403	0.0014	C	7.471	0.00627	6.044	0.7504	1.389	26.31	1	0.7493
16	rs59002125	16276741	A	0.008403	0.0014	G	7.471	0.00627	6.044	0.7504	1.389	26.31	1	0.7493
17	rs139800287	7945725	G	0.008403	0.0014	A	7.471	0.00627	6.044	0.7504	1.389	26.31	1	0.7493
20	rs140510605	40161684	T	0.008403	0.0014	C	7.471	0.00627	6.044	0.7504	1.389	26.31	1	0.7493
1	rs34266482	67292666	A	0.008403	0.0014	C	7.469	0.006276	6.043	0.7504	1.388	26.31	1	0.7493
2	rs147259983	219204534	A	0.008403	0.0014	G	7.469	0.006276	6.043	0.7504	1.388	26.31	1	0.7493
7	rs200287019	47408702	C	0.008403	0.0014	T	7.469	0.006276	6.043	0.7504	1.388	26.31	1	0.7493
11	rs200803638	56310564	A	0.008403	0.0014	G	7.469	0.006276	6.043	0.7504	1.388	26.31	1	0.7493
15	rs150004289	90216446	A	0.008403	0.0014	G	7.469	0.006276	6.043	0.7504	1.388	26.31	1	0.7493
6	rs750377	114860722	T	0.2815	0.2086	C	7.469	0.006278	1.486	0.1458	1.117	1.978	1	0.7493
2	rs73945001	73675110	G	0.008403	0.001401	A	7.468	0.006282	6.042	0.7504	1.388	26.3	1	0.7493
5	rs10077494	161847002	C	0.008403	0.001401	T	7.468	0.006282	6.042	0.7504	1.388	26.3	1	0.7493
17	rs145209834	79804487	T	0.008403	0.001401	C	7.468	0.006282	6.042	0.7504	1.388	26.3	1	0.7493
10	rs853576	119820073	G	0.08824	0.04926	T	7.464	0.006293	1.868	0.2323	1.185	2.945	1	0.7493
22	rs143857582	37524843	T	0.008403	0.001401	C	7.464	0.006294	6.04	0.7504	1.388	26.29	1	0.7493
19	rs4802915	52766862	T	0.2059	0.1431	G	7.463	0.006298	1.553	0.1624	1.13	2.135	1	0.7493
14	rs4983182	27170890	A	0.2353	0.1682	G	7.463	0.006299	1.522	0.1547	1.124	2.061	1	0.7493
6	rs1634731	30955681	G	0.2395	0.1719	A	7.459	0.006313	1.518	0.1538	1.123	2.051	1	0.7499
20	rs16991866	6093177	G	0.1681	0.1116	A	7.459	0.006314	1.609	0.1757	1.14	2.271	1	0.7499
4	rs13142383	133561788	C	0.3151	0.4027	T	7.453	0.006333	0.6825	0.1408	0.5179	0.8993	1	0.7504
18	rs3826626	670888	C	0.008403	0.001403	T	7.452	0.006336	6.033	0.7504	1.386	26.26	1	0.7504
21	rs2824204	18429167	G	0.4202	0.3357	A	7.452	0.006338	1.434	0.1327	1.106	1.86	1	0.7504
2	rs150167013	3447577	C	0.02101	0.006426	T	7.451	0.00634	3.318	0.466	1.331	8.271	1	0.7504
16	rs28382827	66977895	T	0.02101	0.006427	C	7.449	0.006348	3.317	0.466	1.331	8.27	1	0.7504
7	rs17163201	90417457	T	0.105	0.1723	C	7.448	0.006349	0.5638	0.2128	0.3716	0.8556	1	0.7504
6	rs2326366	3978257	A	0.3613	0.4502	C	7.445	0.006361	0.6911	0.1362	0.5292	0.9024	1	0.7504
21	rs146895208	47581435	A	0.0	0.03036	T	7.445	0.006362	0.0	inf	0.0	nan	1	0.7504
2	rs843469	240105617	G	0.07143	0.1316	A	7.443	0.006368	0.5078	0.2531	0.3092	0.8339	1	0.7504
2	rs11691608	81933316	T	0.3151	0.2388	C	7.441	0.006376	1.466	0.1411	1.112	1.934	1	0.7504
1	rs6685120	18311140	G	0.3866	0.4757	A	7.44	0.006378	0.6945	0.1343	0.5337	0.9037	1	0.7504
17	rs34805215	72943418	A	0.02521	0.008506	G	7.44	0.00638	3.015	0.4253	1.31	6.938	1	0.7504
20	rs860968	12745271	G	0.3782	0.2965	T	7.44	0.00638	1.443	0.1351	1.107	1.88	1	0.7504
2	rs7588395	176490148	G	0.1218	0.192	A	7.439	0.006383	0.584	0.1995	0.395	0.8635	1	0.7504
6	rs34341363	82765836	G	0.1568	0.1022	A	7.438	0.006386	1.633	0.1816	1.144	2.331	1	0.7504
11	rs4963331	62794074	A	0.4118	0.3279	C	7.437	0.006391	1.435	0.1331	1.105	1.863	1	0.7505
20	rs7262469	4184858	C	0.4034	0.4926	A	7.433	0.006403	0.6964	0.1334	0.5362	0.9045	1	0.7513
8	rs2061133	63830366	A	0.1933	0.2726	G	7.432	0.006409	0.6393	0.1654	0.4623	0.8841	1	0.7515
3	rs9880478	59228745	C	0.09664	0.1622	T	7.428	0.006421	0.5526	0.2208	0.3585	0.8518	1	0.7523
14	rs2747005	86076064	G	0.3992	0.4883	A	7.425	0.006431	0.6962	0.1336	0.5358	0.9045	1	0.7523
1	rs7531293	33947467	C	0.3718	0.4614	T	7.424	0.006437	0.6908	0.1365	0.5286	0.9027	1	0.7523
9	rs2541161	131884802	T	0.3655	0.2849	C	7.422	0.006442	1.446	0.1361	1.107	1.888	1	0.7523
17	rs11653889	3627456	A	0.02941	0.01074	T	7.418	0.006457	2.792	0.3937	1.291	6.04	1	0.7523
6	rs151284340	52850270	C	0.01681	0.00453	T	7.418	0.006458	3.757	0.5221	1.35	10.45	1	0.7523
7	rs148125780	127669499	A	0.01681	0.00453	G	7.418	0.006458	3.757	0.5221	1.35	10.45	1	0.7523
22	rs200427054	43280404	T	0.01681	0.00453	G	7.418	0.006458	3.757	0.5221	1.35	10.45	1	0.7523
20	rs6052713	4624558	G	0.2143	0.2956	A	7.417	0.006461	0.65	0.1594	0.4756	0.8883	1	0.7523
3	rs199632820	53326467	C	0.01681	0.00453	T	7.416	0.006466	3.756	0.5221	1.35	10.45	1	0.7523
17	rs868052564	2577395	A	0.0	0.03025	G	7.416	0.006466	0.0	inf	0.0	nan	1	0.7523
13	rs540519	110922195	A	0.1513	0.2256	G	7.414	0.006473	0.6118	0.1822	0.4281	0.8744	1	0.7525
18	rs9807203	41899726	T	0.1008	0.1671	C	7.41	0.006487	0.559	0.2166	0.3656	0.8547	1	0.7534
10	rs3781550	117961273	G	0.1807	0.2585	A	7.409	0.00649	0.6324	0.1697	0.4535	0.8821	1	0.7534
20	rs6065524	41309611	T	0.2773	0.2052	G	7.408	0.006494	1.486	0.1465	1.115	1.981	1	0.7534
18	rs1788027	52942827	A	0.5378	0.4492	G	7.406	0.006501	1.427	0.1313	1.103	1.846	1	0.7537
17	rs8082524	33068380	A	0.3067	0.2315	G	7.399	0.006525	1.469	0.1422	1.112	1.941	1	0.7559
12	rs17299939	94603994	T	0.1092	0.177	C	7.397	0.006532	0.5703	0.2092	0.3785	0.8593	1	0.7561
13	rs9536272	53320600	G	0.521	0.4328	A	7.396	0.006536	1.426	0.131	1.103	1.843	1	0.7561
11	rs8995	63595072	C	0.5678	0.4785	A	7.395	0.006542	1.432	0.1327	1.104	1.857	1	0.7563
10	rs4582902	97529318	T	0.5588	0.47	C	7.39	0.006559	1.428	0.1318	1.103	1.85	1	0.7573
7	rs11761528	99118801	T	0.1429	0.09135	C	7.388	0.006565	1.658	0.1879	1.147	2.396	1	0.7573
2	rs1982200	25205427	C	0.339	0.4273	T	7.388	0.006566	0.6873	0.1387	0.5237	0.902	1	0.7573
12	rs703649	104086040	A	0.4832	0.3961	G	7.386	0.006572	1.425	0.131	1.102	1.843	1	0.7573
16	rs725514	82854894	G	0.563	0.4742	T	7.386	0.006574	1.429	0.1319	1.103	1.85	1	0.7573
2	rs2688890	50388475	A	0.5378	0.4493	G	7.384	0.006582	1.426	0.1313	1.103	1.845	1	0.7578
11	rs74547795	85431954	T	0.03361	0.0131	G	7.382	0.006588	2.621	0.3684	1.273	5.396	1	0.7578
2	rs4452212	137015991	A	0.521	0.4329	G	7.38	0.006594	1.425	0.131	1.102	1.842	1	0.7578
3	rs73079003	49832788	A	0.1903	0.1289	G	7.378	0.006601	1.588	0.1716	1.134	2.223	1	0.7578
15	rs16972486	75066008	T	0.02521	0.008543	C	7.378	0.006604	3.001	0.4252	1.304	6.906	1	0.7578
3	rs1132200	119150836	T	0.2185	0.1541	C	7.377	0.006605	1.535	0.1589	1.124	2.095	1	0.7578
22	rs130132	49097331	A	0.2689	0.1979	G	7.374	0.006616	1.491	0.148	1.115	1.992	1	0.7585
18	rs10502692	36040352	T	0.2627	0.1922	C	7.373	0.006622	1.498	0.1497	1.117	2.008	1	0.7587
20	rs1056141	6096632	A	0.1681	0.1118	G	7.369	0.006636	1.604	0.1757	1.137	2.264	1	0.7597
5	rs741146	148307111	T	0.437	0.352	G	7.367	0.006645	1.429	0.1321	1.103	1.851	1	0.7598
13	rs9565462	36242931	G	0.1723	0.1153	A	7.365	0.00665	1.597	0.174	1.135	2.246	1	0.7598
9	rs11788777	105790199	C	0.2143	0.1506	A	7.365	0.006651	1.539	0.16	1.125	2.106	1	0.7598
11	rs7108225	4928841	C	0.1513	0.09817	T	7.363	0.006659	1.637	0.1835	1.143	2.346	1	0.7602
18	rs17710595	28176711	A	0.4412	0.356	G	7.361	0.006665	1.428	0.1319	1.103	1.849	1	0.7603
14	rs4403996	105582524	G	0.4364	0.3512	A	7.36	0.006669	1.43	0.1326	1.103	1.855	1	0.7603
6	rs1893895	162440687	T	0.1008	0.1668	C	7.358	0.006677	0.5601	0.2166	0.3663	0.8564	1	0.7607
5	rs12300	154256175	A	0.1261	0.07816	G	7.352	0.0067	1.701	0.1982	1.154	2.509	1	0.7626
20	rs1146264	35489005	A	0.4118	0.5005	G	7.351	0.006703	0.6986	0.133	0.5384	0.9066	1	0.7626
4	rs1389331	134335871	T	0.4034	0.492	C	7.346	0.006721	0.6979	0.1334	0.5374	0.9064	1	0.7636
14	rs117656327	23450548	G	0.0	0.03205	C	7.346	0.006721	0.0	inf	0.0	nan	1	0.7636
3	rs959942	65148588	C	0.02521	0.008565	T	7.344	0.00673	2.994	0.4251	1.301	6.886	1	0.7641
20	rs295182	38363717	G	0.3782	0.297	A	7.34	0.006744	1.439	0.1351	1.104	1.876	1	0.7646
5	rs1805328	34911914	C	0.07143	0.03747	G	7.339	0.006748	1.976	0.2562	1.196	3.264	1	0.7646
7	rs12704984	77082896	C	0.584	0.4954	T	7.338	0.006753	1.43	0.1328	1.103	1.855	1	0.7646
12	rs11180137	75054487	A	0.08403	0.1465	G	7.338	0.006753	0.5344	0.235	0.3371	0.8471	1	0.7646
19	rs10411403	30215811	C	0.4655	0.3784	A	7.336	0.006758	1.431	0.1329	1.103	1.857	1	0.7646
7	rs10224002	151415041	G	0.3613	0.2815	A	7.333	0.006771	1.444	0.1364	1.105	1.887	1	0.7655
13	rs2151208	30674906	T	0.2563	0.187	C	7.33	0.006782	1.498	0.1503	1.116	2.011	1	0.7663
15	rs7178925	55397388	C	0.1975	0.1365	T	7.324	0.006803	1.557	0.165	1.127	2.152	1	0.7675
13	rs9506266	30708254	G	0.3908	0.3088	T	7.322	0.00681	1.436	0.1343	1.103	1.868	1	0.7675
3	rs9867172	29551939	T	0.06303	0.03171	C	7.322	0.006811	2.054	0.2717	1.206	3.499	1	0.7675
3	rs7638535	6182793	G	0.2899	0.2168	A	7.322	0.006812	1.475	0.1446	1.111	1.958	1	0.7675
4	rs4862310	185034183	T	0.3151	0.4019	G	7.318	0.006825	0.6848	0.1408	0.5197	0.9024	1	0.7685
17	rs113318717	79526379	A	0.0	0.02985	G	7.316	0.006833	0.0	inf	0.0	nan	1	0.7688
1	rs11206722	56506564	A	0.5	0.4128	C	7.315	0.006839	1.423	0.1309	1.101	1.839	1	0.769
11	rs10790152	116457650	G	0.4202	0.3364	A	7.314	0.006843	1.429	0.1327	1.102	1.854	1	0.769
4	rs1039938	93918343	T	0.4118	0.3286	C	7.308	0.006865	1.431	0.1331	1.102	1.857	1	0.7709
5	rs7727839	41190399	C	0.5252	0.4374	A	7.307	0.006869	1.423	0.1312	1.1	1.84	1	0.7709
12	rs989144	48483973	C	0.09244	0.1565	T	7.305	0.006875	0.5489	0.2252	0.3531	0.8535	1	0.7709
3	rs56084453	44762830	G	0.2605	0.1908	A	7.301	0.006893	1.494	0.1495	1.114	2.002	1	0.7722
17	rs4314	61561304	T	0.0	0.0298	C	7.3	0.006895	0.0	inf	0.0	nan	1	0.7722
14	rs7150406	92958612	A	0.1933	0.2718	G	7.296	0.006912	0.6419	0.1654	0.4642	0.8877	1	0.7734
6	rs12201934	55412503	C	0.1345	0.2057	T	7.294	0.00692	0.5997	0.1913	0.4122	0.8726	1	0.7734
14	rs878085	58405679	T	0.1975	0.2764	C	7.293	0.00692	0.6442	0.1641	0.4671	0.8886	1	0.7734
5	rs9314040	163977979	C	0.521	0.4334	T	7.291	0.006929	1.422	0.131	1.1	1.839	1	0.7738
9	rs3802487	125590647	A	0.1008	0.1664	G	7.286	0.00695	0.5616	0.2166	0.3673	0.8587	1	0.7749
3	rs17180771	19975139	T	0.2899	0.2169	C	7.285	0.006952	1.474	0.1446	1.11	1.956	1	0.7749
19	rs12462359	52535421	G	0.1261	0.196	T	7.285	0.006954	0.5917	0.1966	0.4024	0.8698	1	0.7749
2	rs2646179	175598518	T	0.5798	0.4915	C	7.284	0.006957	1.428	0.1326	1.101	1.851	1	0.7749
5	rs17053604	155967644	G	0.02101	0.006508	A	7.28	0.006973	3.276	0.4659	1.314	8.163	1	0.7761
5	rs13359189	99377324	C	0.03361	0.01318	T	7.277	0.006984	2.604	0.3683	1.265	5.36	1	0.7766
20	rs203544	1195784	C	0.4916	0.4049	T	7.276	0.006988	1.421	0.131	1.1	1.837	1	0.7766
8	rs2244476	14600390	G	0.3529	0.4406	A	7.275	0.006991	0.6927	0.1369	0.5297	0.9058	1	0.7766
11	rs1939236	128602827	G	0.2017	0.1402	A	7.272	0.007002	1.55	0.1636	1.124	2.135	1	0.7773
3	rs6442427	211745	C	0.2479	0.1799	T	7.271	0.007008	1.502	0.152	1.115	2.024	1	0.7774
6	rs760899	50693607	C	0.5588	0.4707	T	7.265	0.007031	1.424	0.1318	1.1	1.844	1	0.7784
15	rs2200490	65183950	A	0.5294	0.4418	C	7.264	0.007034	1.422	0.1311	1.099	1.838	1	0.7784
2	rs10184630	134172551	A	0.2899	0.217	G	7.264	0.007037	1.473	0.1446	1.11	1.955	1	0.7784
7	rs711459	109267610	C	0.08403	0.1461	T	7.262	0.007041	0.5361	0.235	0.3382	0.8498	1	0.7784
12	rs1635544	48380031	G	0.3487	0.4362	A	7.259	0.007055	0.6923	0.1372	0.529	0.9059	1	0.7784
6	rs3812163	7725760	T	0.3824	0.4703	A	7.258	0.007059	0.6971	0.1346	0.5354	0.9076	1	0.7784
2	rs17505481	3756073	A	0.3319	0.4189	G	7.255	0.007071	0.6893	0.1389	0.5251	0.905	1	0.7784
1	rs1022265	61196715	G	0.3655	0.2858	A	7.25	0.007091	1.44	0.1361	1.103	1.88	1	0.7784
6	rs12527818	93911119	C	0.395	0.3131	T	7.249	0.007092	1.432	0.134	1.101	1.862	1	0.7784
8	rs2668880	103956525	G	0.5256	0.4374	A	7.249	0.007094	1.425	0.1322	1.1	1.846	1	0.7784
2	rs764977	81757391	C	0.4407	0.3559	T	7.249	0.007095	1.426	0.1325	1.1	1.849	1	0.7784
17	rs7207403	47210506	C	0.5084	0.4213	A	7.248	0.007098	1.42	0.131	1.099	1.836	1	0.7784
4	rs1420884	161764629	A	0.07983	0.1409	C	7.247	0.007102	0.5289	0.2406	0.33	0.8475	1	0.7784
11	rs481855	100969360	C	0.2563	0.3396	T	7.246	0.007106	0.67	0.1497	0.4997	0.8985	1	0.7784
11	rs755901261	33689540	T	0.0	0.02959	C	7.245	0.00711	0.0	inf	0.0	nan	1	0.7784
21	rs2298857	42857981	A	0.2941	0.2209	G	7.243	0.007118	1.47	0.1439	1.108	1.949	1	0.7784
16	rs4782966	84474137	T	0.2857	0.3707	C	7.24	0.007131	0.679	0.1447	0.5114	0.9017	1	0.7784
18	rs325379	38307941	T	0.4407	0.3559	G	7.238	0.007137	1.426	0.1325	1.1	1.848	1	0.7784
2	rs10496583	123118913	A	0.1597	0.1054	C	7.236	0.007147	1.613	0.1794	1.135	2.293	1	0.7784
12	rs5005556	120029538	A	0.09664	0.05592	G	7.235	0.00715	1.806	0.2229	1.167	2.796	1	0.7784
17	rs2907465	61384439	A	0.2227	0.3035	G	7.234	0.007153	0.6574	0.157	0.4832	0.8944	1	0.7784
1	rs12406116	107444101	C	0.02101	0.06376	T	7.233	0.007158	0.3151	0.4535	0.1296	0.7665	1	0.7784
19	rs11668386	19531910	G	0.06723	0.1253	A	7.232	0.007163	0.5033	0.2603	0.3022	0.8382	1	0.7784
8	rs2059547	54193095	C	0.04202	0.09285	T	7.23	0.00717	0.4285	0.3246	0.2268	0.8096	1	0.7784
18	rs12605910	30466362	T	0.1637	0.2408	C	7.229	0.007174	0.6173	0.1811	0.4329	0.8804	1	0.7784
2	rs1023632	150065692	A	0.395	0.3132	G	7.228	0.007177	1.431	0.134	1.101	1.861	1	0.7784
10	rs8578	98353421	G	0.07983	0.1408	A	7.228	0.007178	0.5293	0.2406	0.3303	0.8482	1	0.7784
14	rs8008197	100243600	A	0.09244	0.1561	G	7.227	0.007181	0.5506	0.2252	0.3542	0.8562	1	0.7784
3	rs9878228	64120052	A	0.2857	0.3706	G	7.226	0.007184	0.6793	0.1447	0.5115	0.9021	1	0.7784
10	rs7080900	64128913	C	0.1933	0.2714	T	7.226	0.007185	0.6433	0.1654	0.4651	0.8896	1	0.7784
1	rs2781064	8926868	C	0.5504	0.4627	T	7.224	0.007195	1.422	0.1316	1.099	1.84	1	0.7784
5	rs257752	15823365	T	0.2311	0.3125	C	7.224	0.007195	0.6611	0.155	0.4879	0.8959	1	0.7784
7	rs10266732	141732665	T	0.008403	0.001434	C	7.222	0.007203	5.9	0.7504	1.355	25.68	1	0.7784
4	rs4420983	6733659	A	0.1513	0.2245	G	7.22	0.00721	0.6157	0.1822	0.4308	0.88	1	0.7784
12	rs10875969	50206723	A	0.5672	0.4794	G	7.217	0.007223	1.423	0.1321	1.099	1.844	1	0.7784
6	rs4534020	120805969	G	0.2857	0.2135	A	7.216	0.007226	1.474	0.1453	1.109	1.959	1	0.7784
10	rs2949369	126719704	T	0.584	0.4961	C	7.215	0.007229	1.426	0.1328	1.099	1.85	1	0.7784
1	rs649754	22906247	C	0.1261	0.1956	A	7.214	0.007234	0.5931	0.1966	0.4034	0.872	1	0.7784
17	rs11649742	8176415	T	0.1261	0.1956	C	7.214	0.007234	0.5931	0.1966	0.4034	0.872	1	0.7784
18	rs8096947	36779181	A	0.2815	0.2098	C	7.214	0.007236	1.476	0.1458	1.109	1.964	1	0.7784
14	rs7152165	97650049	A	0.3782	0.4658	G	7.213	0.007239	0.6974	0.1349	0.5353	0.9084	1	0.7784
8	rs6651164	123004940	G	0.2227	0.1583	A	7.212	0.00724	1.523	0.1578	1.118	2.075	1	0.7784
9	rs13297517	2900843	T	0.3782	0.2977	C	7.212	0.00724	1.435	0.1351	1.101	1.87	1	0.7784
13	rs17078934	24128199	T	0.2353	0.1692	C	7.212	0.007242	1.511	0.1547	1.116	2.046	1	0.7784
1	rs55882158	74671074	T	0.01261	0.002883	C	7.211	0.007247	4.416	0.6052	1.349	14.46	1	0.7784
5	rs12514212	11148537	T	0.4832	0.3971	C	7.211	0.007247	1.419	0.131	1.098	1.835	1	0.7784
6	rs61742778	147055043	A	0.01261	0.002883	G	7.211	0.007247	4.416	0.6052	1.349	14.46	1	0.7784
18	rs11875811	11655887	G	0.2185	0.1547	A	7.211	0.007247	1.527	0.1589	1.119	2.085	1	0.7784
3	rs7640062	64617699	G	0.4958	0.4093	A	7.21	0.007249	1.419	0.131	1.098	1.834	1	0.7784
4	rs201774943	168155233	T	0.01261	0.002884	C	7.207	0.007263	4.414	0.6052	1.348	14.45	1	0.7789
14	rs12884161	41483267	G	0.08403	0.1458	A	7.207	0.007263	0.5373	0.2351	0.339	0.8518	1	0.7789
3	rs1876506	42547127	C	0.02521	0.008649	T	7.204	0.007275	2.964	0.425	1.289	6.818	1	0.779
12	rs10849451	6524679	C	0.5636	0.4755	T	7.203	0.007277	1.425	0.1325	1.099	1.847	1	0.779
5	rs12521549	116184752	T	0.3235	0.2476	C	7.202	0.007284	1.454	0.1401	1.104	1.913	1	0.779
7	rs1986703	153301445	T	0.1134	0.1809	C	7.201	0.007287	0.5796	0.2057	0.3872	0.8674	1	0.779
2	rs3849370	106571717	C	0.09244	0.156	T	7.2	0.007288	0.5512	0.2252	0.3544	0.857	1	0.779
2	rs2030675	107679474	T	0.3866	0.3056	C	7.198	0.007299	1.432	0.1346	1.1	1.864	1	0.7797
9	rs7867311	11790536	C	0.3782	0.4657	A	7.195	0.007309	0.6977	0.1349	0.5356	0.9088	1	0.7802
5	rs12189093	19394510	T	0.08403	0.1458	C	7.194	0.007313	0.5376	0.2351	0.3391	0.8522	1	0.7802
22	rs55994715	44220864	G	0.1849	0.1263	C	7.191	0.007325	1.568	0.1692	1.126	2.185	1	0.7807
8	rs11990155	126645018	T	0.2101	0.1476	C	7.189	0.007336	1.536	0.1612	1.12	2.106	1	0.7807
1	rs10864330	8168564	T	0.4496	0.365	C	7.189	0.007337	1.421	0.1317	1.098	1.839	1	0.7807
19	rs12611374	28610780	C	0.2647	0.3482	T	7.188	0.007341	0.6739	0.1482	0.504	0.9009	1	0.7807
8	rs2376419	54194489	A	0.04202	0.09265	G	7.187	0.007342	0.4295	0.3246	0.2273	0.8115	1	0.7807
2	rs13397975	35305420	T	0.1597	0.2337	G	7.181	0.007368	0.6229	0.1783	0.4392	0.8834	1	0.783
20	rs17347022	47097755	C	0.2479	0.1803	T	7.179	0.007374	1.499	0.152	1.113	2.019	1	0.7831
4	rs6823165	182784916	T	0.4034	0.491	C	7.178	0.007379	0.7008	0.1334	0.5396	0.9101	1	0.7831
21	rs4920108	43891321	T	0.2647	0.195	C	7.177	0.007385	1.486	0.1487	1.11	1.989	1	0.7832
7	rs2975199	151016648	T	0.08824	0.1507	C	7.171	0.007409	0.5452	0.2299	0.3474	0.8556	1	0.785
17	rs11652975	72288399	T	0.4244	0.3412	C	7.17	0.007415	1.424	0.1325	1.098	1.846	1	0.785
1	rs12726261	91380440	C	0.1303	0.2002	T	7.168	0.00742	0.5983	0.1939	0.4091	0.8749	1	0.785
11	rs16905974	20314643	C	0.03361	0.01327	T	7.168	0.00742	2.586	0.3683	1.257	5.323	1	0.785
16	rs4787057	7724705	A	0.5756	0.4881	G	7.165	0.007435	1.423	0.1324	1.098	1.844	1	0.7858
8	rs16938857	75211071	C	0.008403	0.04411	T	7.164	0.007438	0.1837	0.7115	0.04554	0.7407	1	0.7858
8	rs11992458	54439839	A	0.06303	0.1197	G	7.163	0.007442	0.4949	0.2682	0.2926	0.8371	1	0.7858
3	rs6809018	104493257	T	0.1398	0.2115	G	7.161	0.007451	0.606	0.1891	0.4184	0.8779	1	0.7859
21	rs2142312	15909676	T	0.1653	0.2405	C	7.16	0.007453	0.6252	0.1771	0.4419	0.8846	1	0.7859
1	rs869080	18751864	G	0.2269	0.3076	A	7.156	0.007472	0.6607	0.156	0.4866	0.897	1	0.7864
5	rs11748836	153381848	T	0.1765	0.1195	C	7.156	0.007472	1.58	0.1723	1.127	2.214	1	0.7864
6	rs9365019	159423454	T	0.1134	0.1806	C	7.156	0.007472	0.5805	0.2057	0.3879	0.8689	1	0.7864
3	rs11924014	37370566	T	0.01261	0.002897	A	7.154	0.00748	4.394	0.6052	1.342	14.39	1	0.7867
6	rs201237	10020243	G	0.3025	0.3877	A	7.151	0.007492	0.6849	0.1423	0.5182	0.9053	1	0.7875
1	rs12567266	4726454	T	0.1639	0.2383	C	7.148	0.007503	0.6266	0.1764	0.4434	0.8854	1	0.7877
22	rs134871	42652716	C	0.4076	0.4951	T	7.148	0.007505	0.7017	0.1332	0.5405	0.9109	1	0.7877
10	rs117244352	72298745	T	0.0	0.03148	C	7.147	0.007508	0.0	inf	0.0	nan	1	0.7877
3	rs838268	189849198	T	0.3445	0.4311	C	7.145	0.007516	0.6935	0.1376	0.5296	0.9083	1	0.788
8	rs4907391	142684445	G	0.1261	0.1952	A	7.14	0.007538	0.5947	0.1966	0.4045	0.8743	1	0.7898
8	rs6993453	93584392	C	0.2017	0.1407	T	7.139	0.007543	1.543	0.1636	1.12	2.127	1	0.7898
22	rs566039	27642581	C	0.2373	0.319	A	7.129	0.007587	0.6643	0.1542	0.491	0.8987	1	0.7939
12	rs17103134	67391409	T	0.03636	0.08742	G	7.127	0.007595	0.3939	0.3616	0.1939	0.8003	1	0.7942
6	rs9351099	87183511	T	0.08824	0.04992	C	7.126	0.007599	1.842	0.2323	1.168	2.904	1	0.7942
1	rs150330307	160160801	C	0.05462	0.02636	T	7.122	0.007613	2.134	0.2908	1.207	3.774	1	0.7944
13	rs1325372	108633711	C	0.09244	0.1555	T	7.122	0.007615	0.553	0.2252	0.3557	0.8598	1	0.7944
20	rs6065682	42628687	G	0.416	0.3335	A	7.12	0.007624	1.423	0.1329	1.097	1.847	1	0.7944
4	rs12510292	133535054	G	0.3277	0.4137	T	7.119	0.007627	0.6909	0.1393	0.5258	0.9079	1	0.7944
6	rs17085911	155389334	G	0.08403	0.04686	A	7.118	0.007633	1.866	0.2376	1.171	2.972	1	0.7944
5	rs2546741	173233656	C	0.5	0.4139	T	7.117	0.007636	1.416	0.1309	1.095	1.83	1	0.7944
11	rs2653565	8893193	T	0.2983	0.3831	C	7.117	0.007636	0.6845	0.1429	0.5173	0.9058	1	0.7944
4	rs17515274	82905378	A	0.2983	0.3831	G	7.116	0.007639	0.6845	0.1429	0.5173	0.9058	1	0.7944
12	rs6487883	30321589	T	0.521	0.4344	C	7.113	0.007653	1.416	0.131	1.095	1.831	1	0.7952
7	rs12533251	99115677	A	0.1429	0.09216	G	7.103	0.007693	1.642	0.1879	1.136	2.373	1	0.7987
20	rs1555141	5782559	A	0.2815	0.3654	G	7.101	0.007702	0.6804	0.1454	0.5117	0.9047	1	0.7987
11	rs9919560	11590971	A	0.3613	0.2827	C	7.1	0.007706	1.436	0.1364	1.099	1.876	1	0.7987
17	rs1043809	19239432	C	0.1176	0.1853	T	7.101	0.007706	0.5863	0.2027	0.3941	0.8723	1	0.7987
8	rs6470739	130570669	A	0.3151	0.2404	G	7.1	0.00771	1.454	0.1411	1.102	1.917	1	0.7987
1	rs10436957	15768304	A	0.1345	0.2046	G	7.098	0.007718	0.6038	0.1914	0.4149	0.8785	1	0.799
4	rs2113966	21179758	G	0.06723	0.1246	A	7.092	0.007744	0.5065	0.2603	0.3041	0.8436	1	0.7992
17	rs17762258	55903829	G	0.09244	0.1554	A	7.092	0.007744	0.5537	0.2252	0.3561	0.8608	1	0.7992
14	rs1952270	29918662	T	0.2227	0.1588	C	7.091	0.007745	1.518	0.1578	1.114	2.068	1	0.7992
21	rs219749	37848438	C	0.4076	0.3258	T	7.09	0.007752	1.424	0.1333	1.096	1.849	1	0.7992
6	rs8192591	32185796	T	0.07143	0.03789	C	7.09	0.007753	1.954	0.2561	1.182	3.227	1	0.7992
4	rs13102223	30991363	C	0.3067	0.2329	T	7.088	0.00776	1.457	0.1422	1.103	1.925	1	0.7992
9	rs2025318	14346131	T	0.2895	0.3756	G	7.086	0.007767	0.6773	0.1472	0.5075	0.9039	1	0.7992
16	rs7203398	53189672	C	0.322	0.2465	A	7.086	0.007767	1.452	0.1409	1.102	1.914	1	0.7992
19	rs7260214	9026651	T	0.1597	0.2332	C	7.086	0.007768	0.6248	0.1783	0.4406	0.8861	1	0.7992
1	rs7519478	159743845	C	0.3613	0.4479	T	7.083	0.00778	0.6973	0.1362	0.534	0.9106	1	0.7992
19	rs751049058	52496567	A	0.0	0.02896	G	7.083	0.007782	0.0	inf	0.0	nan	1	0.7992
19	rs4801754	48764857	A	0.5798	0.4928	G	7.081	0.007791	1.421	0.1326	1.096	1.842	1	0.7992
3	rs4856346	81502655	T	0.3739	0.2944	G	7.081	0.007792	1.431	0.1355	1.098	1.867	1	0.7992
1	rs11810781	158729713	C	0.3109	0.2367	T	7.08	0.007793	1.455	0.1417	1.102	1.92	1	0.7992
18	rs965992	7222638	C	0.1303	0.1997	T	7.08	0.007794	0.6001	0.1939	0.4104	0.8777	1	0.7992
17	rs12948043	41615830	C	0.3445	0.2673	T	7.079	0.0078	1.441	0.1379	1.099	1.888	1	0.7992
12	rs270873	94370895	T	0.05882	0.1139	C	7.077	0.007806	0.4861	0.277	0.2825	0.8366	1	0.7992
8	rs7825763	35041361	A	0.04622	0.09768	G	7.077	0.007807	0.4476	0.3102	0.2437	0.8223	1	0.7992
5	rs17116411	154142057	T	0.1303	0.08219	G	7.074	0.007821	1.672	0.1954	1.14	2.453	1	0.7998
22	rs3788662	45981447	T	0.5168	0.4306	C	7.073	0.007824	1.414	0.131	1.094	1.829	1	0.7998
20	rs292898	38309107	C	0.3277	0.252	T	7.072	0.007832	1.447	0.1397	1.1	1.902	1	0.7998
3	rs7612552	65235610	A	0.1555	0.1025	G	7.07	0.007837	1.613	0.1814	1.13	2.301	1	0.7998
3	rs16824723	154934868	A	0.1526	0.2349	G	7.069	0.007841	0.5867	0.2029	0.3942	0.8732	1	0.7998
3	rs80238762	39180100	A	0.02521	0.008731	G	7.069	0.007842	2.936	0.4248	1.277	6.751	1	0.7998
9	rs10125438	119598710	A	0.2311	0.1661	G	7.065	0.007862	1.508	0.1557	1.112	2.047	1	0.8013
2	rs1915222	50438701	C	0.2101	0.2888	T	7.063	0.00787	0.6549	0.1604	0.4783	0.8969	1	0.8016
8	rs7836805	38063235	A	0.2949	0.2218	C	7.062	0.007875	1.467	0.145	1.104	1.949	1	0.8016
7	rs977663	53105335	T	0.1345	0.08557	G	7.058	0.007891	1.66	0.1928	1.138	2.422	1	0.8027
11	rs7117257	5614275	C	0.1261	0.1947	T	7.054	0.007909	0.5965	0.1966	0.4057	0.877	1	0.804
5	rs4868515	174785110	C	0.09664	0.1602	T	7.051	0.007922	0.5608	0.2208	0.3638	0.8645	1	0.8045
6	rs16872954	95102401	T	0.1092	0.06589	G	7.047	0.007941	1.739	0.211	1.15	2.629	1	0.8045
10	rs11186122	92077274	C	0.5588	0.4721	A	7.046	0.007943	1.417	0.1318	1.094	1.834	1	0.8045
2	rs6750969	143868223	G	0.2839	0.2124	A	7.046	0.007944	1.47	0.1461	1.104	1.958	1	0.8045
4	rs13142831	114797011	C	0.3655	0.2869	A	7.044	0.007955	1.432	0.1361	1.097	1.87	1	0.8045
4	rs11735477	164393117	A	0.2288	0.164	T	7.043	0.007959	1.512	0.1569	1.112	2.057	1	0.8045
16	rs2071915	426432	T	0.5427	0.4555	C	7.042	0.00796	1.419	0.1325	1.094	1.84	1	0.8045
8	rs1026804	81518320	C	0.2269	0.1626	T	7.042	0.007962	1.511	0.1567	1.112	2.055	1	0.8045
14	rs210381	54107791	A	0.4076	0.4944	G	7.042	0.007962	0.7035	0.1332	0.5419	0.9133	1	0.8045
16	rs751214	54542033	C	0.2395	0.1735	A	7.042	0.007963	1.5	0.1538	1.11	2.027	1	0.8045
1	rs1415564	95947234	T	0.1008	0.1651	C	7.03	0.008015	0.5672	0.2167	0.371	0.8673	1	0.8093
2	rs7575946	3754240	G	0.3559	0.4424	A	7.025	0.008039	0.6965	0.1372	0.5323	0.9113	1	0.8113
5	rs661408	146055403	C	0.06356	0.1199	T	7.021	0.008056	0.4981	0.2683	0.2944	0.8428	1	0.8124
22	rs5756012	36347646	A	0.1387	0.08903	C	7.02	0.00806	1.647	0.1903	1.134	2.392	1	0.8124
11	rs199784204	551826	C	0.008403	0.001464	T	7.017	0.008072	5.781	0.7504	1.328	25.16	1	0.8132
22	rs2899258	36355358	G	0.1387	0.08904	T	7.015	0.008083	1.647	0.1903	1.134	2.391	1	0.8135
13	rs8002632	29222286	A	0.2647	0.3471	G	7.014	0.008086	0.677	0.1482	0.5064	0.9052	1	0.8135
10	rs7069425	8840705	C	0.1387	0.209	T	7.012	0.008097	0.6094	0.1889	0.4208	0.8825	1	0.8139
3	rs6764363	312349	C	0.3824	0.3026	T	7.011	0.008099	1.427	0.1348	1.095	1.858	1	0.8139
9	rs4979489	117768680	T	0.3697	0.2909	C	7.009	0.008111	1.43	0.1358	1.096	1.866	1	0.8146
9	rs12349316	19556835	T	0.1681	0.113	C	7.006	0.008124	1.586	0.1757	1.124	2.238	1	0.8153
6	rs2206272	50765352	A	0.3277	0.4129	G	7.001	0.008149	0.693	0.1393	0.5274	0.9106	1	0.8169
3	rs4856863	67470690	A	0.5546	0.4682	G	6.999	0.008155	1.414	0.1317	1.093	1.831	1	0.8169
19	rs247778	19842053	A	0.3824	0.3027	G	6.992	0.008188	1.426	0.1348	1.095	1.857	1	0.8169
12	rs10850234	109914695	C	0.1975	0.2746	A	6.991	0.008194	0.6501	0.1641	0.4713	0.8967	1	0.8169
7	rs13237658	16994809	T	0.1486	0.223	C	6.989	0.008203	0.6083	0.1899	0.4192	0.8826	1	0.8169
4	rs13121637	164380632	C	0.2311	0.1664	T	6.987	0.008208	1.505	0.1557	1.109	2.042	1	0.8169
6	rs4945516	114791568	G	0.479	0.3944	A	6.983	0.008227	1.412	0.1311	1.092	1.825	1	0.8169
13	rs9516520	95672858	C	0.1723	0.1166	T	6.98	0.008241	1.577	0.174	1.122	2.218	1	0.8169
20	rs41293138	31619515	A	0.01681	0.004696	G	6.98	0.008241	3.623	0.5214	1.304	10.07	1	0.8169
4	rs1509620	95563972	A	0.3151	0.241	G	6.979	0.008246	1.449	0.1411	1.099	1.911	1	0.8169
2	rs13409478	134081421	C	0.3109	0.2372	T	6.977	0.008258	1.451	0.1417	1.099	1.915	1	0.8169
7	rs7779983	21654602	C	0.5756	0.4892	T	6.976	0.008261	1.416	0.1324	1.093	1.836	1	0.8169
10	rs17009617	50453933	A	0.1092	0.06606	G	6.975	0.008264	1.734	0.211	1.147	2.622	1	0.8169
4	rs13434489	177907949	A	0.01261	0.002943	C	6.975	0.008266	4.325	0.6052	1.321	14.16	1	0.8169
11	rs319027	89249010	T	0.04202	0.01847	C	6.974	0.008268	2.331	0.3301	1.221	4.452	1	0.8169
12	rs751290561	112187061	T	0.0	0.02849	C	6.974	0.008271	0.0	inf	0.0	nan	1	0.8169
7	rs28479036	149806177	G	0.06838	0.126	A	6.972	0.008278	0.5091	0.2605	0.3056	0.8483	1	0.8169
3	rs345065	8862925	T	0.395	0.3146	C	6.97	0.008289	1.422	0.134	1.094	1.849	1	0.8169
12	rs838333	114998551	G	0.07563	0.1344	A	6.97	0.00829	0.5272	0.2466	0.3251	0.8548	1	0.8169
3	rs17060183	59191320	G	0.0	0.02847	A	6.969	0.008292	0.0	inf	0.0	nan	1	0.8169
2	rs17647806	182780874	T	0.08824	0.05024	C	6.967	0.008303	1.83	0.2323	1.16	2.884	1	0.8169
6	rs9503859	3970823	T	0.3655	0.4515	C	6.963	0.008321	0.7	0.1358	0.5364	0.9136	1	0.8169
16	rs117587884	57091999	A	0.0	0.0289	G	6.96	0.008334	0.0	inf	0.0	nan	1	0.8169
6	rs9368699	31802541	C	0.07563	0.0411	T	6.956	0.008353	1.909	0.2494	1.171	3.112	1	0.8169
10	rs7090712	129289558	C	0.4407	0.3575	T	6.956	0.008354	1.416	0.1325	1.092	1.836	1	0.8169
8	rs12679739	48931357	G	0.2437	0.3244	A	6.956	0.008355	0.671	0.1522	0.4979	0.9043	1	0.8169
20	rs6079823	15422629	C	0.1639	0.2372	T	6.955	0.008356	0.6303	0.1765	0.4459	0.8908	1	0.8169
18	rs948355	10466018	C	0.4622	0.3784	T	6.955	0.008357	1.412	0.1314	1.091	1.826	1	0.8169
1	rs12756603	22981876	G	0.07983	0.1394	A	6.953	0.008367	0.5356	0.2406	0.3342	0.8583	1	0.8169
10	rs11011159	37665513	C	0.03782	0.08615	T	6.952	0.008373	0.4169	0.3424	0.2131	0.8155	1	0.8169
19	rs45591734	52618506	T	0.0	0.02838	C	6.947	0.008394	0.0	inf	0.0	nan	1	0.8169
12	rs2579247	20232244	G	0.03782	0.01593	A	6.946	0.008402	2.427	0.3475	1.228	4.796	1	0.8169
6	rs16883016	19969480	A	0.09664	0.05654	G	6.943	0.008415	1.785	0.2229	1.153	2.763	1	0.8169
13	rs6491353	98136968	G	0.1008	0.05972	A	6.943	0.008416	1.766	0.2186	1.15	2.71	1	0.8169
8	rs12543494	24400773	C	0.03361	0.08022	T	6.942	0.008419	0.3988	0.3612	0.1965	0.8095	1	0.8169
1	rs2232455	6662057	A	0.0	0.02931	G	6.94	0.008427	0.0	inf	0.0	nan	1	0.8169
11	rs12418067	36310677	T	0.1975	0.1378	C	6.94	0.008429	1.539	0.1649	1.114	2.127	1	0.8169
10	rs2147439	11911704	A	0.02521	0.008812	G	6.94	0.008431	2.909	0.4247	1.265	6.688	1	0.8169
14	rs3783300	30070659	A	0.3403	0.4255	C	6.938	0.008437	0.6965	0.138	0.5314	0.9129	1	0.8169
14	rs4899366	71150421	A	0.3782	0.2991	G	6.936	0.008448	1.425	0.1351	1.093	1.857	1	0.8169
2	rs385665	40406967	G	0.2311	0.1667	A	6.934	0.008459	1.503	0.1557	1.108	2.039	1	0.8169
2	rs3770313	80790287	C	0.3445	0.4298	T	6.934	0.008459	0.6973	0.1376	0.5324	0.9132	1	0.8169
18	rs17744022	30016917	A	0.1429	0.09265	C	6.933	0.00846	1.632	0.1879	1.129	2.359	1	0.8169
5	rs11738947	124593936	T	0.2983	0.2261	C	6.933	0.008462	1.455	0.1433	1.099	1.927	1	0.8169
22	rs4821506	36994063	T	0.1555	0.2276	C	6.932	0.008465	0.6249	0.1802	0.4389	0.8895	1	0.8169
2	rs11563220	234835170	T	0.008403	0.001482	C	6.932	0.008466	5.708	0.7482	1.317	24.74	1	0.8169
3	rs148716747	186395473	A	0.008403	0.001482	G	6.932	0.008466	5.708	0.7482	1.317	24.74	1	0.8169
5	rs199710815	76128739	T	0.008403	0.001482	C	6.932	0.008466	5.708	0.7482	1.317	24.74	1	0.8169
5	rs182592775	133997162	T	0.008403	0.001482	C	6.932	0.008466	5.708	0.7482	1.317	24.74	1	0.8169
7	rs145588023	148288054	C	0.008403	0.001482	T	6.932	0.008466	5.708	0.7482	1.317	24.74	1	0.8169
8	rs9792239	18536593	C	0.008403	0.001482	T	6.932	0.008466	5.708	0.7482	1.317	24.74	1	0.8169
11	rs61751340	5012646	A	0.008403	0.001482	G	6.932	0.008466	5.708	0.7482	1.317	24.74	1	0.8169
12	rs117331652	1702929	G	0.008403	0.001482	T	6.932	0.008466	5.708	0.7482	1.317	24.74	1	0.8169
12	rs17118224	53097191	T	0.008403	0.001482	C	6.932	0.008466	5.708	0.7482	1.317	24.74	1	0.8169
13	rs138493654	39587409	A	0.008403	0.001482	C	6.932	0.008466	5.708	0.7482	1.317	24.74	1	0.8169
15	rs146047218	78475108	A	0.008403	0.001482	T	6.932	0.008466	5.708	0.7482	1.317	24.74	1	0.8169
16	rs117563656	20792417	T	0.008403	0.001482	C	6.932	0.008466	5.708	0.7482	1.317	24.74	1	0.8169
18	rs147724274	46808512	T	0.008403	0.001482	G	6.932	0.008466	5.708	0.7482	1.317	24.74	1	0.8169
19	rs147619980	38861397	T	0.008403	0.001482	C	6.932	0.008466	5.708	0.7482	1.317	24.74	1	0.8169
2	rs4848632	121562595	A	0.4958	0.411	G	6.93	0.008474	1.409	0.131	1.09	1.822	1	0.8169
3	rs140855092	15270563	T	0.008403	0.001483	C	6.93	0.008474	5.707	0.7482	1.317	24.74	1	0.8169
5	rs28383481	131729380	A	0.008403	0.001483	G	6.93	0.008474	5.707	0.7482	1.317	24.74	1	0.8169
8	rs149628772	12958149	T	0.008403	0.001483	G	6.93	0.008474	5.707	0.7482	1.317	24.74	1	0.8169
11	rs138061928	126147035	G	0.008403	0.001483	T	6.93	0.008474	5.707	0.7482	1.317	24.74	1	0.8169
12	rs11380	6601475	A	0.008403	0.001483	G	6.93	0.008474	5.707	0.7482	1.317	24.74	1	0.8169
12	rs78374723	53096894	T	0.008403	0.001483	C	6.929	0.008482	5.706	0.7482	1.317	24.73	1	0.8169
13	rs16974304	110163438	A	0.008403	0.001483	G	6.927	0.008489	5.705	0.7482	1.316	24.73	1	0.8169
20	rs145225110	31876616	C	0.008403	0.001483	T	6.927	0.008489	5.705	0.7482	1.316	24.73	1	0.8169
6	rs200361985	56029264	A	0.008403	0.001483	G	6.926	0.008497	5.704	0.7482	1.316	24.72	1	0.8169
14	rs137961578	50655380	G	0.008403	0.001483	C	6.926	0.008497	5.704	0.7482	1.316	24.72	1	0.8169
18	rs8086057	47083106	C	0.008403	0.001483	T	6.926	0.008497	5.704	0.7482	1.316	24.72	1	0.8169
13	rs17592438	103385534	T	0.2185	0.1558	C	6.925	0.008501	1.515	0.1588	1.109	2.068	1	0.8169
4	rs1369028	158366623	A	0.1555	0.2276	G	6.924	0.008502	0.6248	0.1803	0.4387	0.8897	1	0.8169
2	rs143283662	85570442	T	0.0	0.03052	C	6.921	0.008517	0.0	inf	0.0	nan	1	0.8174
12	rs11068043	116925539	A	0.1111	0.184	C	6.919	0.008527	0.5545	0.2274	0.3551	0.8658	1	0.8174
16	rs193911	49520603	G	0.1134	0.1793	A	6.918	0.008534	0.5857	0.2058	0.3913	0.8766	1	0.8174
15	rs934537	55424856	C	0.2143	0.1522	T	6.917	0.008536	1.519	0.16	1.11	2.078	1	0.8174
7	rs4987097	17383061	C	0.1303	0.08263	A	6.913	0.008558	1.663	0.1954	1.134	2.438	1	0.8174
2	rs4539783	231339731	G	0.4076	0.3267	A	6.913	0.008559	1.417	0.1333	1.092	1.841	1	0.8174
9	rs17440439	132005835	T	0.1134	0.06941	G	6.911	0.008566	1.716	0.2078	1.142	2.578	1	0.8174
2	rs2381757	146422643	T	0.3824	0.3032	C	6.91	0.008573	1.423	0.1348	1.092	1.853	1	0.8174
3	rs146412623	97887833	A	0.01261	0.002965	G	6.908	0.008582	4.293	0.6045	1.313	14.04	1	0.8174
6	rs28701813	14572304	C	0.01261	0.002965	T	6.908	0.008582	4.293	0.6045	1.313	14.04	1	0.8174
5	rs6884141	101816104	A	0.1618	0.241	G	6.906	0.008589	0.6079	0.1913	0.4178	0.8844	1	0.8174
3	rs77308703	49736537	T	0.01261	0.002965	C	6.906	0.008591	4.292	0.6045	1.313	14.04	1	0.8174
6	rs144950678	150239348	T	0.01261	0.002965	A	6.906	0.008591	4.292	0.6045	1.313	14.04	1	0.8174
9	rs961831	22362104	G	0.1176	0.07273	T	6.906	0.008592	1.7	0.2042	1.139	2.536	1	0.8174
8	rs73713681	142477563	T	0.1176	0.1841	C	6.9	0.008619	0.5909	0.2025	0.3973	0.8789	1	0.8174
17	rs11078306	15383769	T	0.2773	0.2074	G	6.9	0.008621	1.466	0.1465	1.1	1.954	1	0.8174
8	rs2336409	809079	C	0.2899	0.373	A	6.899	0.008623	0.6863	0.1441	0.5174	0.9103	1	0.8174
6	rs6918447	149027559	A	0.3782	0.2993	G	6.899	0.008625	1.424	0.1351	1.092	1.855	1	0.8174
3	rs73129977	80923147	G	0.01261	0.002967	A	6.899	0.008626	4.289	0.6045	1.312	14.03	1	0.8174
9	rs10811002	18637737	T	0.437	0.3546	C	6.899	0.008626	1.412	0.1321	1.09	1.83	1	0.8174
11	rs3781836	121448338	A	0.05042	0.1023	G	6.898	0.008628	0.466	0.2978	0.26	0.8353	1	0.8174
1	rs17805981	232744422	G	0.3067	0.2338	A	6.897	0.008634	1.45	0.1422	1.097	1.916	1	0.8174
17	rs16949426	14290540	G	0.2269	0.306	A	6.895	0.008643	0.6657	0.156	0.4903	0.9038	1	0.8174
20	rs4239689	34950604	G	0.2353	0.315	A	6.894	0.008646	0.669	0.1541	0.4947	0.9049	1	0.8174
7	rs858506	99820050	T	0.1303	0.1986	C	6.894	0.008647	0.6041	0.1939	0.4131	0.8835	1	0.8174
8	rs13267264	23689103	G	0.2415	0.1757	A	6.894	0.008647	1.494	0.1539	1.105	2.021	1	0.8174
6	rs142375687	167571027	T	0.0	0.02818	C	6.894	0.008649	0.0	inf	0.0	nan	1	0.8174
1	rs1343192	108613888	T	0.2269	0.306	C	6.892	0.008658	0.6657	0.156	0.4903	0.9038	1	0.8174
10	rs10786769	105562717	G	0.4706	0.3868	A	6.892	0.008659	1.409	0.1312	1.089	1.822	1	0.8174
5	rs2079103	131864506	A	0.2479	0.3285	C	6.891	0.008661	0.6738	0.1514	0.5008	0.9065	1	0.8174
8	rs2380622	70950759	C	0.4034	0.3229	A	6.89	0.008666	1.417	0.1336	1.091	1.842	1	0.8174
4	rs34049746	8082472	C	0.01261	0.00297	T	6.888	0.00868	4.285	0.6045	1.31	14.01	1	0.8174
2	rs4853848	2899681	G	0.2521	0.3329	A	6.885	0.008693	0.6753	0.1505	0.5028	0.9071	1	0.8174
3	rs303860	11883445	G	0.1218	0.1889	A	6.884	0.008698	0.5958	0.1995	0.403	0.8809	1	0.8174
6	rs11155297	143825104	T	0.2227	0.3014	G	6.883	0.008704	0.6641	0.157	0.4882	0.9035	1	0.8174
8	rs7017120	2366909	T	0.05882	0.113	G	6.883	0.008704	0.4908	0.277	0.2852	0.8446	1	0.8174
12	rs190837666	4768306	T	0.0	0.02814	C	6.882	0.008706	0.0	inf	0.0	nan	1	0.8174
13	rs4942068	42184792	C	0.2479	0.1815	T	6.882	0.008708	1.486	0.152	1.103	2.002	1	0.8174
15	rs7172578	96038806	C	0.5126	0.4276	T	6.882	0.008709	1.408	0.131	1.089	1.82	1	0.8174
12	rs11175601	65346888	A	0.3992	0.485	G	6.881	0.008714	0.7055	0.1336	0.543	0.9167	1	0.8174
8	rs28504323	142476611	A	0.1176	0.184	G	6.88	0.008717	0.5913	0.2025	0.3976	0.8795	1	0.8174
20	rs6012463	47146053	C	0.2605	0.1926	T	6.879	0.008723	1.476	0.1495	1.102	1.979	1	0.8174
9	rs41305451	102677589	C	0.1597	0.1065	T	6.878	0.008725	1.594	0.1794	1.122	2.266	1	0.8174
10	rs12784975	98380137	C	0.09664	0.1592	T	6.876	0.008735	0.5648	0.2208	0.3664	0.8706	1	0.8174
4	rs3113765	181535808	G	0.3403	0.4251	A	6.875	0.00874	0.6976	0.138	0.5323	0.9144	1	0.8174
9	rs143877651	139748282	G	0.03782	0.016	T	6.875	0.00874	2.418	0.3476	1.223	4.779	1	0.8174
7	rs12532441	62360358	C	0.4958	0.4113	T	6.873	0.008749	1.407	0.131	1.089	1.819	1	0.8174
3	rs4680534	159698945	C	0.2605	0.3418	T	6.873	0.00875	0.6784	0.1489	0.5066	0.9083	1	0.8174
18	rs1941184	29038123	C	0.4622	0.3789	A	6.873	0.008751	1.409	0.1314	1.089	1.823	1	0.8174
13	rs1847022	97720443	T	0.1723	0.1169	C	6.87	0.008765	1.572	0.174	1.118	2.21	1	0.818
20	rs6133261	5760038	G	0.3824	0.3034	A	6.87	0.008767	1.421	0.1348	1.091	1.851	1	0.818
13	rs9573570	76064409	G	0.2815	0.2113	A	6.869	0.008772	1.462	0.1458	1.099	1.946	1	0.818
8	rs28439396	142476555	G	0.1176	0.1839	A	6.865	0.008789	0.5917	0.2025	0.3978	0.88	1	0.8186
12	rs11180162	75081042	C	0.1176	0.1839	T	6.865	0.008789	0.5917	0.2025	0.3978	0.88	1	0.8186
6	rs2224211	85563069	G	0.3529	0.2762	A	6.862	0.008805	1.43	0.1372	1.093	1.871	1	0.8193
8	rs7838471	24659652	G	0.2185	0.1561	A	6.862	0.008807	1.512	0.1588	1.107	2.064	1	0.8193
16	rs7197907	82577585	A	0.542	0.4566	G	6.861	0.008812	1.408	0.1314	1.089	1.822	1	0.8193
2	rs146256742	109088343	G	0.01261	0.002979	A	6.856	0.008832	4.273	0.6045	1.307	13.97	1	0.8196
5	rs396045	25841613	A	0.395	0.3152	G	6.856	0.008832	1.418	0.134	1.09	1.844	1	0.8196
15	rs1053909	92715571	A	0.2227	0.3012	G	6.856	0.008833	0.6646	0.1571	0.4885	0.9042	1	0.8196
19	rs10424274	39851986	G	0.008403	0.001488	A	6.856	0.008834	5.687	0.7504	1.307	24.76	1	0.8196
8	rs10955167	99374877	G	0.1345	0.2032	A	6.855	0.008841	0.609	0.1913	0.4185	0.8861	1	0.8196
20	rs856404	51263786	G	0.3571	0.2801	A	6.854	0.008846	1.428	0.1368	1.092	1.867	1	0.8196
1	rs1342709	147277764	C	0.4328	0.3509	T	6.853	0.00885	1.411	0.1322	1.089	1.829	1	0.8196
10	rs342386	84611100	C	0.3403	0.2646	T	6.852	0.008854	1.434	0.1383	1.093	1.88	1	0.8196
3	rs9843580	87733256	A	0.375	0.4768	G	6.85	0.008863	0.6583	0.1609	0.4803	0.9023	1	0.8197
5	rs4958401	154648174	G	0.1737	0.2479	T	6.85	0.008865	0.638	0.1731	0.4545	0.8957	1	0.8197
6	rs28362681	32370879	T	0.04202	0.09107	C	6.848	0.008873	0.4378	0.3246	0.2317	0.8271	1	0.8197
9	rs11243755	135257703	T	0.1176	0.1838	C	6.847	0.008879	0.5921	0.2025	0.3981	0.8806	1	0.8197
2	rs7603107	149865389	C	0.02101	0.006726	T	6.845	0.008887	3.169	0.4655	1.272	7.891	1	0.8197
10	rs16918975	65626926	G	0.08403	0.04739	A	6.845	0.008888	1.844	0.2375	1.158	2.937	1	0.8197
1	rs2336016	108854166	A	0.2731	0.355	G	6.845	0.00889	0.6828	0.1467	0.5121	0.9102	1	0.8197
4	rs7356507	5860906	G	0.3067	0.3902	A	6.844	0.008896	0.6914	0.1418	0.5237	0.913	1	0.8197
7	rs1637001	99808151	G	0.1303	0.1984	A	6.842	0.008903	0.6053	0.1939	0.4139	0.8851	1	0.82
3	rs10935162	135018895	A	0.1356	0.2048	G	6.84	0.008911	0.6091	0.1915	0.4185	0.8864	1	0.8203
20	rs6015934	59800060	G	0.2983	0.3814	A	6.834	0.008942	0.6897	0.1429	0.5212	0.9126	1	0.8225
2	rs11673716	154273475	G	0.2437	0.1781	A	6.834	0.008946	1.487	0.1528	1.102	2.007	1	0.8225
6	rs9403708	145807214	C	0.08824	0.05052	T	6.83	0.008966	1.819	0.2323	1.154	2.867	1	0.8233
3	rs6801461	142871062	T	0.3067	0.2341	C	6.828	0.008972	1.447	0.1422	1.095	1.912	1	0.8233
3	rs2555499	168245830	T	0.2373	0.3171	C	6.828	0.008974	0.67	0.1543	0.4952	0.9065	1	0.8233
9	rs7856656	37421065	T	0.4244	0.3431	C	6.828	0.008974	1.412	0.1325	1.089	1.83	1	0.8233
19	rs10426376	35233027	T	0.1765	0.1206	C	6.826	0.008985	1.563	0.1723	1.115	2.191	1	0.8238
4	rs4481278	139748640	C	0.2353	0.3146	T	6.823	0.008998	0.6704	0.1541	0.4957	0.9067	1	0.8239
1	rs3811448	154516578	A	0.1737	0.257	G	6.823	0.008999	0.6077	0.1926	0.4166	0.8864	1	0.8239
19	rs9749349	1329639	A	0.4661	0.3826	G	6.823	0.009002	1.409	0.1318	1.088	1.824	1	0.8239
19	rs7259871	46390280	C	0.2983	0.2266	T	6.82	0.009012	1.451	0.1433	1.096	1.922	1	0.8242
14	rs12588659	100587813	A	0.03361	0.07971	C	6.819	0.009022	0.4016	0.3615	0.1977	0.8156	1	0.8242
16	rs12918754	84967089	G	0.4359	0.3534	A	6.818	0.009023	1.414	0.1332	1.089	1.835	1	0.8242
12	rs2431011	96101271	C	0.1975	0.1383	T	6.818	0.009024	1.533	0.1649	1.11	2.119	1	0.8242
4	rs11099935	154974131	C	0.1471	0.2174	T	6.816	0.009036	0.6207	0.1843	0.4325	0.8909	1	0.8248
10	rs2935653	126730491	C	0.5672	0.4819	T	6.808	0.009073	1.409	0.1321	1.088	1.826	1	0.827
7	rs10225143	147426374	A	0.3655	0.2881	G	6.807	0.009079	1.424	0.1361	1.09	1.859	1	0.827
6	rs2093525	169556108	G	0.2185	0.1563	A	6.807	0.009082	1.509	0.1588	1.105	2.061	1	0.827
1	rs479938	34238852	G	0.1681	0.1137	A	6.806	0.009086	1.575	0.1757	1.116	2.223	1	0.827
10	rs2992333	26727454	G	0.3109	0.3943	A	6.806	0.009087	0.6931	0.1413	0.5255	0.9142	1	0.827
12	rs28772589	110845040	T	0.07203	0.03865	C	6.805	0.00909	1.931	0.2567	1.167	3.193	1	0.827
6	rs576496	153881380	T	0.411	0.3303	C	6.802	0.009108	1.415	0.1337	1.089	1.839	1	0.8279
3	rs2366408	159696099	T	0.2605	0.3414	G	6.801	0.009111	0.6797	0.1489	0.5077	0.9101	1	0.8279
14	rs9658655	93398031	C	0.105	0.06325	G	6.8	0.009117	1.738	0.2147	1.141	2.648	1	0.828
2	rs10153889	1397415	G	0.06723	0.03542	A	6.799	0.009121	1.963	0.2635	1.171	3.289	1	0.828
6	rs3129305	32959180	G	0.03361	0.07978	C	6.796	0.009137	0.4012	0.3625	0.1972	0.8164	1	0.8286
11	rs186343423	6007271	T	0.02101	0.006755	C	6.795	0.00914	3.156	0.4654	1.268	7.856	1	0.8286
1	rs33966768	78998759	C	0.3263	0.2518	T	6.795	0.009143	1.439	0.1404	1.093	1.895	1	0.8286
2	rs12619501	165581707	C	0.3235	0.4073	A	6.792	0.009157	0.696	0.1398	0.5292	0.9154	1	0.8293
12	rs33958906	40707861	T	0.004673	0.03936	C	6.791	0.00916	0.1146	1.003	0.01603	0.8189	1	0.8293
3	rs4680582	160135286	A	0.1933	0.2688	G	6.79	0.009168	0.6518	0.1655	0.4712	0.9015	1	0.8293
3	rs9288817	105439522	A	0.1303	0.1981	G	6.789	0.009171	0.6063	0.194	0.4146	0.8868	1	0.8293
2	rs1430166	134089004	T	0.3067	0.2343	C	6.786	0.009186	1.445	0.1422	1.094	1.91	1	0.8302
8	rs10954965	34331257	C	0.1218	0.1883	T	6.785	0.009191	0.598	0.1995	0.4045	0.8842	1	0.8302
14	rs12883315	52358917	A	0.542	0.4571	G	6.783	0.009204	1.406	0.1314	1.087	1.819	1	0.8309
12	rs12314920	104074151	G	0.3193	0.4029	A	6.78	0.009216	0.6954	0.1403	0.5282	0.9154	1	0.8309
10	rs12244713	90830468	T	0.01681	0.004777	C	6.779	0.009222	3.561	0.5212	1.282	9.891	1	0.8309
3	rs17040196	14745857	A	0.3361	0.4202	G	6.777	0.009232	0.6987	0.1384	0.5326	0.9165	1	0.8309
11	rs60912271	121519662	C	0.01681	0.004778	T	6.777	0.009233	3.561	0.5212	1.282	9.889	1	0.8309
20	rs142436071	25187224	A	0.01681	0.004778	C	6.777	0.009233	3.561	0.5212	1.282	9.889	1	0.8309
5	rs1016104	147138729	A	0.2669	0.3484	G	6.777	0.009234	0.6811	0.1484	0.5092	0.911	1	0.8309
12	rs3851665	127726384	A	0.3025	0.2306	G	6.776	0.009239	1.447	0.1427	1.094	1.914	1	0.8309
1	rs41296177	89655720	T	0.01681	0.004779	C	6.773	0.009253	3.56	0.5212	1.282	9.886	1	0.8317
8	rs10505346	119963843	T	0.2437	0.1783	G	6.772	0.009259	1.485	0.1528	1.1	2.003	1	0.8317
17	rs7223926	42578882	G	0.3277	0.4115	A	6.766	0.009289	0.6973	0.1393	0.5307	0.9162	1	0.8333
6	rs7746284	55284772	C	0.4244	0.3434	T	6.766	0.00929	1.409	0.1325	1.087	1.827	1	0.8333
5	rs835136	14926057	A	0.1849	0.1278	G	6.766	0.009291	1.548	0.1692	1.111	2.156	1	0.8333
19	rs2686768	44995990	C	0.5252	0.4407	T	6.764	0.0093	1.404	0.1311	1.086	1.815	1	0.8334
6	rs9258208	29704545	T	0.0625	0.1191	C	6.764	0.009303	0.4931	0.2774	0.2863	0.8495	1	0.8334
1	rs301798	8488565	G	0.2311	0.3097	A	6.76	0.009322	0.67	0.155	0.4944	0.9079	1	0.8336
3	rs28593245	137320213	C	0.3992	0.4842	A	6.759	0.00933	0.7077	0.1336	0.5447	0.9196	1	0.8336
14	rs1365524	87770671	T	0.4916	0.4079	G	6.758	0.009331	1.403	0.131	1.086	1.814	1	0.8336
9	rs10989064	103111965	T	0.2983	0.3809	C	6.757	0.00934	0.6911	0.1429	0.5223	0.9145	1	0.8336
1	rs12354293	96013073	A	0.1807	0.2547	G	6.756	0.009344	0.6454	0.1698	0.4627	0.9002	1	0.8336
3	rs143013858	52557527	A	0.0	0.02831	G	6.755	0.009351	0.0	inf	0.0	nan	1	0.8336
1	rs12026602	11518397	C	0.4958	0.412	T	6.754	0.009354	1.403	0.131	1.086	1.814	1	0.8336
4	rs11937136	28503413	T	0.0	0.02759	G	6.749	0.00938	0.0	inf	0.0	nan	1	0.8336
9	rs10975851	6846877	C	0.1387	0.0898	T	6.749	0.009381	1.632	0.1903	1.124	2.369	1	0.8336
10	rs7918427	119531719	G	0.1261	0.193	A	6.748	0.009384	0.6032	0.1966	0.4102	0.8868	1	0.8336
2	rs7568054	190497896	A	0.5042	0.4202	G	6.747	0.009389	1.403	0.1309	1.085	1.813	1	0.8336
3	rs6777718	124903161	T	0.3277	0.2536	G	6.747	0.009391	1.435	0.1397	1.091	1.886	1	0.8336
9	rs12347123	13759474	G	0.1218	0.07644	T	6.747	0.009393	1.676	0.2011	1.13	2.486	1	0.8336
16	rs12447331	65382833	A	0.1092	0.06661	G	6.746	0.009394	1.718	0.211	1.137	2.598	1	0.8336
4	rs1559715	55073673	A	0.2521	0.3321	G	6.746	0.009395	0.678	0.1505	0.5048	0.9107	1	0.8336
13	rs4773884	95975185	G	0.2773	0.2081	A	6.746	0.009398	1.46	0.1465	1.095	1.946	1	0.8336
18	rs6508069	48924702	T	0.3025	0.3852	G	6.745	0.009401	0.6923	0.1423	0.5238	0.9151	1	0.8336
3	rs6769025	87766543	C	0.1441	0.09402	T	6.745	0.009403	1.622	0.188	1.122	2.344	1	0.8336
9	rs301468	4645935	G	0.3908	0.4756	A	6.743	0.009412	0.7071	0.1341	0.5437	0.9197	1	0.8336
10	rs2628153	132063909	A	0.5546	0.4698	G	6.741	0.009424	1.405	0.1317	1.086	1.819	1	0.8336
2	rs12329047	36560011	C	0.4496	0.3676	T	6.74	0.009429	1.405	0.1317	1.086	1.819	1	0.8336
6	rs6924193	67157506	C	0.1429	0.2122	T	6.738	0.00944	0.6189	0.1866	0.4294	0.8921	1	0.8336
9	rs2077403	34437469	A	0.06303	0.1175	G	6.737	0.009441	0.5051	0.2682	0.2986	0.8544	1	0.8336
2	rs71421651	233410388	T	0.01681	0.004793	C	6.737	0.009442	3.549	0.5212	1.278	9.856	1	0.8336
13	rs9596751	53583231	G	0.01681	0.05544	A	6.737	0.009442	0.2913	0.5058	0.1081	0.7849	1	0.8336
16	rs148110587	48577065	T	0.02101	0.006785	C	6.737	0.009445	3.141	0.4654	1.262	7.821	1	0.8336
17	rs9889777	49336793	A	0.3261	0.4111	C	6.737	0.009446	0.6933	0.1419	0.525	0.9156	1	0.8336
4	rs7667388	161756548	C	0.2143	0.2914	T	6.735	0.009455	0.6634	0.1592	0.4855	0.9063	1	0.8336
2	rs4146005	22780029	G	0.3697	0.2924	A	6.735	0.009456	1.42	0.1358	1.088	1.853	1	0.8336
6	rs28362682	32372863	T	0.04202	0.09053	A	6.734	0.009457	0.4406	0.3246	0.2332	0.8325	1	0.8336
8	rs17063065	2568679	T	0.1429	0.2121	C	6.733	0.009466	0.619	0.1866	0.4294	0.8923	1	0.8337
6	rs9293851	72437006	G	0.5042	0.42	A	6.732	0.009472	1.404	0.1315	1.085	1.817	1	0.8337
3	rs6782678	65717427	T	0.2563	0.3365	G	6.731	0.009473	0.6797	0.1497	0.5068	0.9115	1	0.8337
2	rs3732240	71366957	A	0.03782	0.01614	C	6.73	0.00948	2.395	0.3474	1.212	4.731	1	0.8339
7	rs10271006	42356814	G	0.3866	0.3081	A	6.729	0.009486	1.415	0.1346	1.087	1.842	1	0.834
10	rs17156139	44845097	T	0.2563	0.1896	C	6.727	0.009498	1.473	0.1503	1.097	1.978	1	0.8341
5	rs465731	75950707	G	0.4622	0.3797	A	6.726	0.009502	1.404	0.1314	1.085	1.816	1	0.8341
8	rs11777747	142466821	T	0.105	0.1684	C	6.726	0.009503	0.5797	0.2128	0.382	0.8797	1	0.8341
3	rs11130310	52674667	T	0.5546	0.4699	C	6.723	0.009519	1.405	0.1317	1.085	1.819	1	0.8351
2	rs11891955	76599289	A	0.2521	0.1859	G	6.721	0.00953	1.476	0.1511	1.098	1.985	1	0.8352
15	rs12917321	26687025	C	0.4068	0.492	T	6.719	0.009538	0.7081	0.1338	0.5448	0.9204	1	0.8352
2	rs13397093	76522519	T	0.2773	0.2082	C	6.718	0.009543	1.459	0.1466	1.095	1.944	1	0.8352
7	rs740182	26576535	C	0.4025	0.4877	T	6.717	0.009549	0.7078	0.134	0.5443	0.9203	1	0.8352
12	rs2540477	96437554	G	0.1471	0.2168	A	6.717	0.009549	0.6228	0.1843	0.434	0.8939	1	0.8352
11	rs1219446	121804892	C	0.5756	0.4908	A	6.716	0.009557	1.407	0.1324	1.086	1.824	1	0.8352
10	rs7068057	128880582	T	0.2269	0.3049	C	6.715	0.009562	0.6692	0.156	0.4929	0.9086	1	0.8352
1	rs12048213	111821434	T	0.1849	0.259	G	6.714	0.009565	0.6487	0.1683	0.4665	0.9022	1	0.8352
3	rs10510849	60563160	A	0.1303	0.1976	G	6.713	0.009573	0.6081	0.1939	0.4158	0.8893	1	0.8352
2	rs10496979	146138077	A	0.1723	0.1175	G	6.711	0.00958	1.564	0.174	1.112	2.199	1	0.8352
5	rs1156008	151575731	T	0.416	0.5007	C	6.71	0.009586	0.7101	0.1328	0.5474	0.9212	1	0.8352
13	rs1328648	36723016	C	0.2815	0.363	T	6.71	0.009586	0.6876	0.1454	0.5172	0.9143	1	0.8352
3	rs4687751	53883910	C	0.2605	0.3408	T	6.71	0.009589	0.6815	0.1489	0.509	0.9124	1	0.8352
8	rs13278529	40333321	G	0.2101	0.1494	T	6.708	0.009597	1.514	0.1612	1.104	2.076	1	0.8352
17	rs143796236	79495969	T	0.03782	0.01615	C	6.708	0.009597	2.395	0.3479	1.211	4.736	1	0.8352
11	rs3740909	125889526	T	0.1387	0.08994	C	6.707	0.009606	1.629	0.1902	1.122	2.365	1	0.8353
9	rs13290882	86497334	A	0.3277	0.2538	G	6.706	0.009608	1.433	0.1397	1.09	1.884	1	0.8353
13	rs17085391	70368382	T	0.0641	0.1193	C	6.704	0.00962	0.5057	0.2684	0.2989	0.8558	1	0.8353
4	rs2433320	95370805	A	0.4916	0.4083	G	6.704	0.009622	1.402	0.131	1.084	1.812	1	0.8353
3	rs6550376	35967682	T	0.1933	0.1352	G	6.701	0.009637	1.533	0.1663	1.107	2.124	1	0.8353
7	rs12706544	123305444	C	0.2983	0.2272	A	6.699	0.009644	1.446	0.1433	1.092	1.915	1	0.8353
19	rs144048376	8979223	C	0.1261	0.07989	G	6.699	0.009646	1.661	0.1981	1.127	2.45	1	0.8353
19	rs56231962	21131664	T	0.1933	0.1352	G	6.699	0.009648	1.533	0.1663	1.107	2.124	1	0.8353
6	rs9492605	130796396	A	0.1724	0.117	C	6.698	0.009651	1.572	0.1763	1.113	2.221	1	0.8353
21	rs2822654	15765902	C	0.3866	0.4711	A	6.696	0.009662	0.7075	0.1343	0.5437	0.9206	1	0.8353
3	rs1882898	60310376	A	0.2983	0.3805	G	6.695	0.009667	0.6923	0.1429	0.5232	0.916	1	0.8353
14	rs8015798	60675089	A	0.05462	0.02694	G	6.695	0.00967	2.087	0.2907	1.18	3.689	1	0.8353
1	rs1890784	14863561	A	0.105	0.1682	C	6.695	0.009671	0.5804	0.2128	0.3825	0.8808	1	0.8353
11	rs11033492	36222477	G	0.3613	0.2848	A	6.694	0.009672	1.421	0.1364	1.087	1.856	1	0.8353
8	rs13268040	111991956	A	0.08403	0.04769	G	6.693	0.009679	1.832	0.2375	1.15	2.918	1	0.8353
12	rs11115644	83607274	A	0.1134	0.07	C	6.692	0.009684	1.7	0.2075	1.132	2.553	1	0.8353
9	rs1220044	25839353	A	0.5168	0.4329	G	6.692	0.009685	1.401	0.131	1.084	1.811	1	0.8353
18	rs8094412	14105853	A	0.2217	0.1586	C	6.691	0.009691	1.511	0.1607	1.103	2.071	1	0.8354
9	rs10814578	37565522	C	0.4202	0.3399	T	6.689	0.009699	1.407	0.1327	1.085	1.825	1	0.8354
2	rs1427446	49480306	T	0.339	0.4229	C	6.689	0.009704	0.6998	0.1387	0.5332	0.9184	1	0.8354
20	rs6136322	1870755	C	0.08333	0.1438	T	6.687	0.009712	0.5413	0.241	0.3375	0.8682	1	0.8354
9	rs7856692	116866605	A	0.2331	0.3117	G	6.686	0.009715	0.6709	0.1554	0.4947	0.9096	1	0.8354
2	rs10933344	231447717	G	0.2941	0.376	A	6.686	0.009716	0.6914	0.1435	0.5219	0.9159	1	0.8354
14	rs1033769	96034350	T	0.1303	0.1975	C	6.685	0.009723	0.6087	0.1939	0.4162	0.8902	1	0.8355
19	rs148183266	21606230	G	0.02101	0.06185	A	6.684	0.009727	0.3255	0.4569	0.1329	0.797	1	0.8355
6	rs12194169	9493302	T	0.105	0.06353	G	6.683	0.009734	1.73	0.2147	1.136	2.635	1	0.8357
12	rs10850957	118526648	C	0.4664	0.384	T	6.681	0.009744	1.402	0.1313	1.084	1.813	1	0.836
8	rs10503714	21850656	G	0.06303	0.1172	A	6.68	0.009751	0.5065	0.2682	0.2994	0.8568	1	0.8362
11	rs10897061	60199046	A	0.3992	0.3202	G	6.678	0.009762	1.411	0.1338	1.085	1.834	1	0.8363
12	rs1397571	71663435	C	0.5168	0.4329	T	6.678	0.009762	1.401	0.131	1.084	1.811	1	0.8363
6	rs6928140	148940600	G	0.2179	0.2956	A	6.675	0.009776	0.6639	0.1596	0.4856	0.9078	1	0.8367
8	rs7006192	1987720	C	0.3025	0.2311	T	6.673	0.009786	1.443	0.1427	1.091	1.909	1	0.8367
15	rs80338868	44949354	T	0.02941	0.01128	C	6.673	0.009789	2.655	0.3932	1.229	5.738	1	0.8367
19	rs10414549	35797150	A	0.2269	0.3046	G	6.673	0.009789	0.67	0.156	0.4935	0.9097	1	0.8367
11	rs7932813	7708281	G	0.2605	0.1935	A	6.672	0.009795	1.468	0.1495	1.095	1.967	1	0.8367
2	rs290876	118258797	T	0.07983	0.04466	C	6.671	0.009797	1.856	0.2432	1.152	2.989	1	0.8367
1	rs1108870	222578271	A	0.1303	0.1974	G	6.67	0.009806	0.609	0.1939	0.4165	0.8907	1	0.837
7	rs322812	127744787	C	0.5042	0.4207	T	6.668	0.009815	1.4	0.131	1.083	1.81	1	0.8372
19	rs10403459	44213380	C	0.3655	0.2888	T	6.668	0.009818	1.419	0.1361	1.087	1.852	1	0.8372
8	rs7013893	91563137	A	0.2773	0.3583	G	6.666	0.009828	0.6873	0.146	0.5163	0.9151	1	0.8372
11	rs12271537	7707101	C	0.2605	0.1936	T	6.665	0.009834	1.468	0.1495	1.095	1.967	1	0.8372
4	rs12510407	137997845	C	0.2143	0.1532	T	6.663	0.009846	1.507	0.16	1.101	2.062	1	0.8372
18	rs12458149	33724053	G	0.09244	0.05401	A	6.661	0.009852	1.784	0.2274	1.143	2.786	1	0.8372
8	rs2977790	6716312	T	0.5714	0.487	C	6.661	0.009853	1.405	0.1322	1.084	1.82	1	0.8372
8	rs17192765	106106951	G	0.1933	0.268	A	6.661	0.009853	0.6545	0.1654	0.4732	0.9051	1	0.8372
14	rs12884405	85540136	G	0.1949	0.2701	A	6.659	0.009863	0.6542	0.1656	0.4729	0.9051	1	0.8372
11	rs4944118	76404415	A	0.2101	0.1496	G	6.658	0.009872	1.511	0.1611	1.102	2.073	1	0.8372
8	rs10503858	29792105	C	0.08403	0.04777	T	6.657	0.009877	1.829	0.2375	1.148	2.913	1	0.8372
7	rs632846	15758208	A	0.2647	0.3449	G	6.656	0.00988	0.6838	0.1482	0.5115	0.9142	1	0.8372
3	rs146089422	31871578	T	0.01271	0.003036	C	6.656	0.009881	4.228	0.6083	1.283	13.93	1	0.8372
6	rs2764092	7302507	A	0.1933	0.2679	G	6.652	0.009903	0.6547	0.1654	0.4734	0.9054	1	0.8372
6	rs1884172	144017778	T	0.2815	0.2123	C	6.652	0.009906	1.454	0.1458	1.092	1.934	1	0.8372
11	rs10837541	41021965	A	0.1555	0.1038	G	6.65	0.009917	1.59	0.1813	1.114	2.268	1	0.8372
6	rs4716055	9853919	G	0.1975	0.1389	T	6.648	0.009924	1.525	0.1649	1.104	2.107	1	0.8372
19	rs8101756	41502522	C	0.1695	0.2419	T	6.649	0.009924	0.6395	0.1748	0.454	0.9008	1	0.8372
19	rs79266675	6141593	A	0.05042	0.02422	T	6.647	0.009931	2.139	0.3021	1.184	3.867	1	0.8372
5	rs10474240	86061783	T	0.4748	0.3923	C	6.646	0.009935	1.4	0.1311	1.083	1.81	1	0.8372
10	rs11013233	23295903	C	0.06303	0.03274	T	6.646	0.009935	1.987	0.2716	1.167	3.384	1	0.8372
5	rs146301345	32784907	A	0.02101	0.006836	G	6.643	0.009953	3.118	0.4652	1.253	7.76	1	0.8372
13	rs7335629	41579868	C	0.02521	0.009005	T	6.64	0.009972	2.846	0.4245	1.238	6.54	1	0.8372
16	rs1994895	17850249	A	0.2101	0.1497	G	6.637	0.009989	1.51	0.1611	1.101	2.071	1	0.8372
7	rs6958341	144566296	C	0.2143	0.2907	A	6.636	0.009991	0.6653	0.1592	0.487	0.909	1	0.8372
1	rs12120571	245470001	T	0.08403	0.1428	C	6.636	0.009996	0.5506	0.2351	0.3473	0.8728	1	0.8372
11	rs570333	78975286	C	0.3782	0.4622	T	6.636	0.009996	0.7076	0.1349	0.5432	0.9218	1	0.8372
8	rs13266182	13963152	C	0.5798	0.4955	T	6.634	0.01001	1.405	0.1326	1.083	1.822	1	0.8372
19	rs12162258	21123919	A	0.1933	0.1354	G	6.632	0.01002	1.53	0.1663	1.104	2.119	1	0.8372
6	rs28397289	31197407	T	0.09244	0.1529	C	6.627	0.01005	0.5644	0.2252	0.363	0.8775	1	0.8372
17	rs8071936	64999003	G	0.04622	0.02151	T	6.627	0.01005	2.205	0.3151	1.189	4.088	1	0.8372
18	rs2851757	25313101	T	0.1345	0.0868	C	6.626	0.01005	1.634	0.1927	1.12	2.385	1	0.8372
3	rs1709621	183976906	A	0.1176	0.07346	G	6.624	0.01006	1.682	0.2042	1.127	2.509	1	0.8372
5	rs111622873	100311353	G	0.1765	0.1213	A	6.624	0.01006	1.553	0.1723	1.108	2.176	1	0.8372
8	rs2167107	83888761	G	0.1429	0.2115	A	6.625	0.01006	0.6214	0.1866	0.4311	0.8957	1	0.8372
18	rs12955300	76415963	T	0.3067	0.2351	C	6.625	0.01006	1.439	0.1422	1.089	1.902	1	0.8372
2	rs843718	54508110	G	0.4076	0.3284	A	6.623	0.01007	1.407	0.1333	1.084	1.827	1	0.8372
2	rs10187079	66211610	A	0.4244	0.3443	G	6.622	0.01007	1.404	0.1325	1.083	1.821	1	0.8372
2	rs11692975	211897927	T	0.2727	0.3612	C	6.622	0.01007	0.6632	0.1607	0.484	0.9087	1	0.8372
2	rs17838596	196877557	C	0.01261	0.003047	T	6.621	0.01008	4.177	0.6039	1.279	13.64	1	0.8372
3	rs61729402	52366368	G	0.01261	0.003047	A	6.621	0.01008	4.177	0.6039	1.279	13.64	1	0.8372
3	rs61749019	52417991	A	0.01261	0.003047	G	6.621	0.01008	4.177	0.6039	1.279	13.64	1	0.8372
4	rs144604709	148968172	A	0.01261	0.003047	G	6.621	0.01008	4.177	0.6039	1.279	13.64	1	0.8372
9	rs138200991	138714802	A	0.01261	0.003047	G	6.621	0.01008	4.177	0.6039	1.279	13.64	1	0.8372
13	rs417155	62875397	G	0.1933	0.2677	A	6.621	0.01008	0.6553	0.1654	0.4738	0.9063	1	0.8372
3	rs138055453	52535766	T	0.01261	0.003048	C	6.619	0.01009	4.176	0.6039	1.279	13.64	1	0.8372
11	rs7113975	93711185	A	0.1218	0.1874	G	6.619	0.01009	0.6017	0.1995	0.407	0.8897	1	0.8372
11	rs11606923	134183850	C	0.02101	0.006848	T	6.62	0.01009	3.112	0.4652	1.25	7.745	1	0.8372
22	rs79966207	50722408	C	0.2563	0.1901	T	6.619	0.01009	1.469	0.1503	1.094	1.972	1	0.8372
2	rs114349107	171070982	A	0.01261	0.003048	G	6.617	0.0101	4.175	0.6039	1.278	13.64	1	0.8372
10	rs10901596	128021575	G	0.5378	0.454	A	6.617	0.0101	1.4	0.1313	1.082	1.81	1	0.8372
11	rs2511781	131198745	T	0.5042	0.421	C	6.616	0.0101	1.398	0.1309	1.082	1.808	1	0.8372
16	rs13380603	76881625	T	0.1849	0.2584	C	6.616	0.01011	0.6508	0.1683	0.468	0.905	1	0.8372
2	rs73987681	196912179	C	0.01261	0.003049	G	6.614	0.01012	4.174	0.6039	1.278	13.63	1	0.8372
10	rs7073160	1710677	A	0.1933	0.2677	G	6.613	0.01012	0.6555	0.1654	0.474	0.9065	1	0.8372
12	rs2270788	123414349	C	0.1639	0.1108	T	6.613	0.01012	1.573	0.1775	1.111	2.227	1	0.8372
13	rs9565839	36651830	A	0.1509	0.2215	C	6.614	0.01012	0.6245	0.1847	0.4348	0.8969	1	0.8372
17	rs12150220	5485367	T	0.3908	0.4748	A	6.614	0.01012	0.7095	0.1341	0.5455	0.9227	1	0.8372
18	rs16950087	46442183	T	0.008403	0.04187	C	6.613	0.01012	0.1939	0.7115	0.04809	0.7823	1	0.8372
1	rs2275029	94473845	C	0.2415	0.1769	T	6.612	0.01013	1.482	0.1539	1.096	2.004	1	0.8372
2	rs12616415	196923798	G	0.01261	0.00305	A	6.612	0.01013	4.173	0.6039	1.278	13.63	1	0.8372
3	rs61734653	52381865	G	0.01261	0.00305	A	6.612	0.01013	4.173	0.6039	1.278	13.63	1	0.8372
5	rs4266385	83718078	C	0.08403	0.04786	T	6.612	0.01013	1.825	0.2375	1.146	2.907	1	0.8372
7	rs1880512	96215832	C	0.2415	0.3203	T	6.609	0.01014	0.6759	0.1533	0.5004	0.9128	1	0.8381
6	rs7770094	1088964	A	0.1765	0.2491	G	6.607	0.01016	0.646	0.1713	0.4617	0.9038	1	0.8385
6	rs9400742	115036813	A	0.2311	0.168	G	6.607	0.01016	1.488	0.1557	1.097	2.019	1	0.8385
18	rs9807444	12300936	C	0.07563	0.1324	T	6.602	0.01018	0.536	0.2466	0.3305	0.8691	1	0.8387
1	rs12031260	118537074	G	0.1092	0.06697	A	6.602	0.01019	1.709	0.2109	1.13	2.584	1	0.8387
3	rs17613797	29685871	G	0.04202	0.08989	A	6.601	0.01019	0.444	0.3246	0.235	0.839	1	0.8387
4	rs17031394	155219662	C	0.2437	0.179	G	6.602	0.01019	1.477	0.1528	1.095	1.993	1	0.8387
5	rs6865029	90799333	C	0.1513	0.1005	A	6.601	0.01019	1.595	0.1834	1.114	2.286	1	0.8387
6	rs341168	158830239	C	0.2627	0.3428	T	6.601	0.01019	0.6832	0.1491	0.51	0.9151	1	0.8387
6	rs3777878	133821417	A	0.07563	0.04176	C	6.596	0.01022	1.878	0.2493	1.152	3.061	1	0.8397
[truncated: 162,396 more rows]
